# Supplementary material for: A circadian rhythm-related gene signature associated with tumor immunity, cisplatin efficacy, and prognosis in bladder cancer
Source: Aging (Albany NY). 2021 Dec 3;13(23):25153–79. doi: 10.18632/aging.203733 (PMC8714136; doi:10.18632/aging.203733)
Supplement: Supplementary Figures [file aging-13-203733-s001.pdf]

SUPPLEMENTARY FIGURES

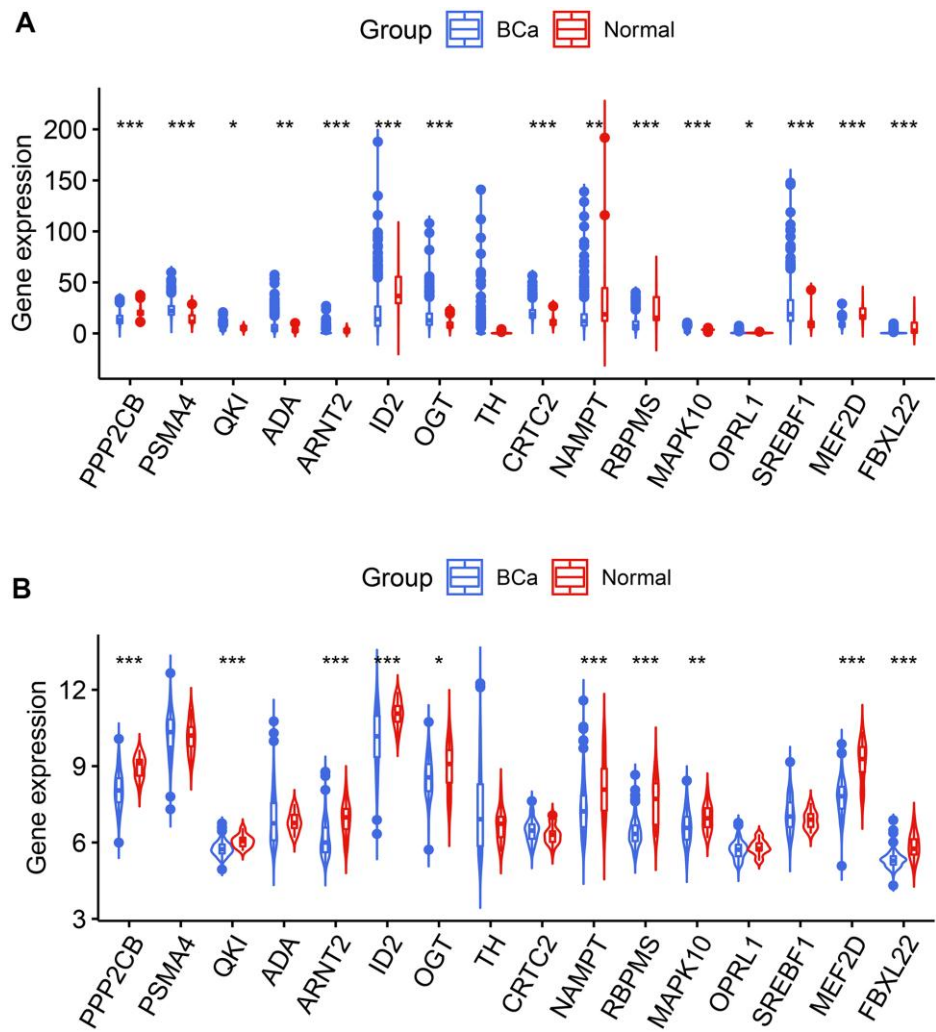

**Supplementary Figure 1.** The expression differences of the 16 CRRS genes between adjacent normal and BCa samples in the TCGA cohort (A) and GSE32894 cohort (B) via Wilcoxon signed-rank tests.

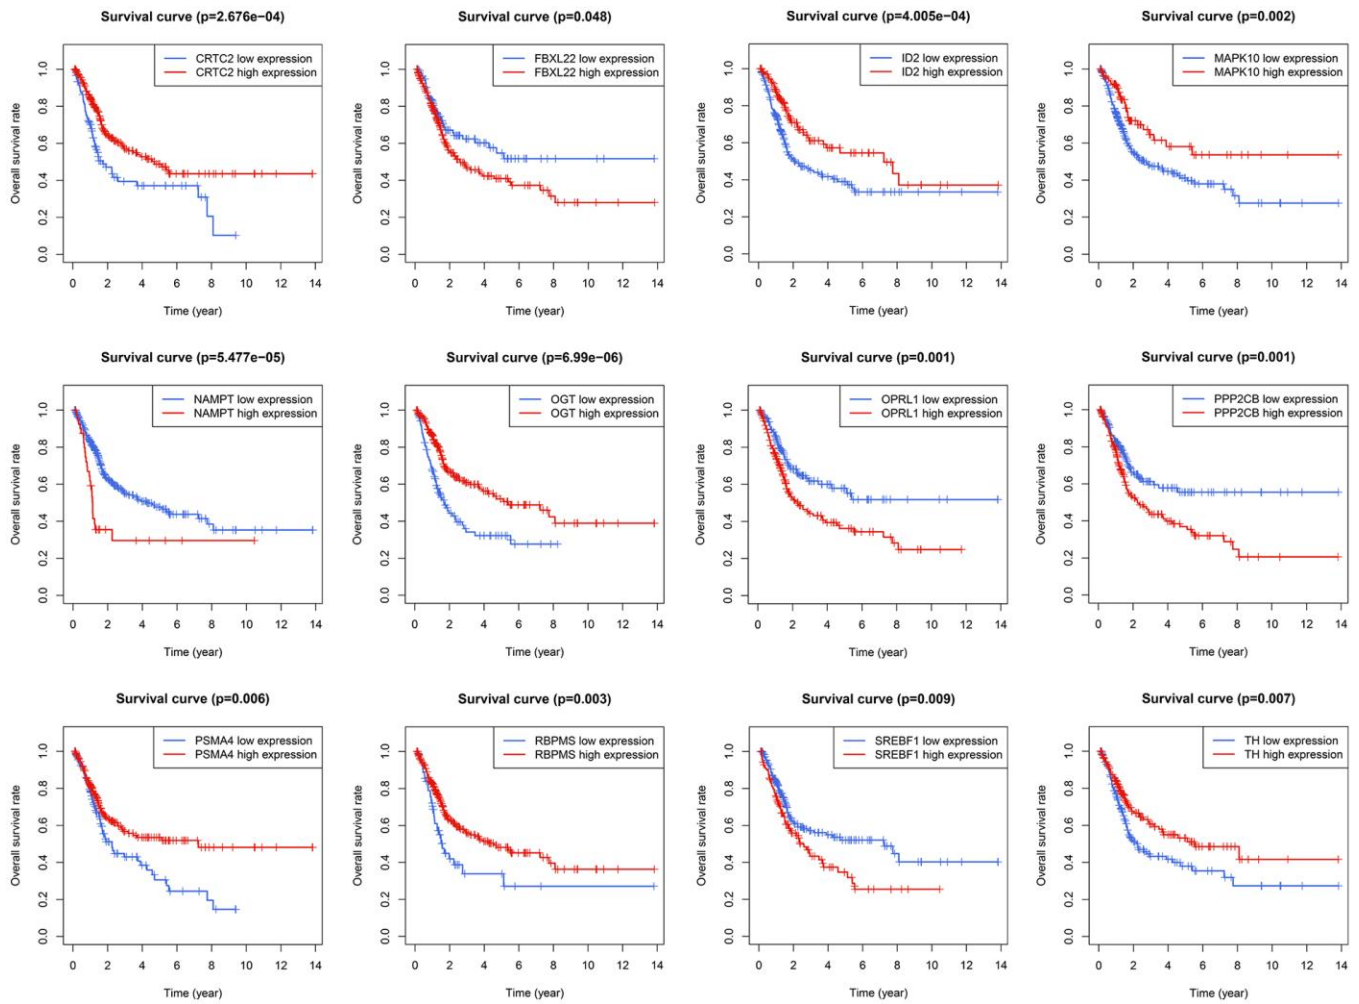

Supplementary Figure 2. The prognostic values of the 16 CRRS genes in the TCGA cohort.

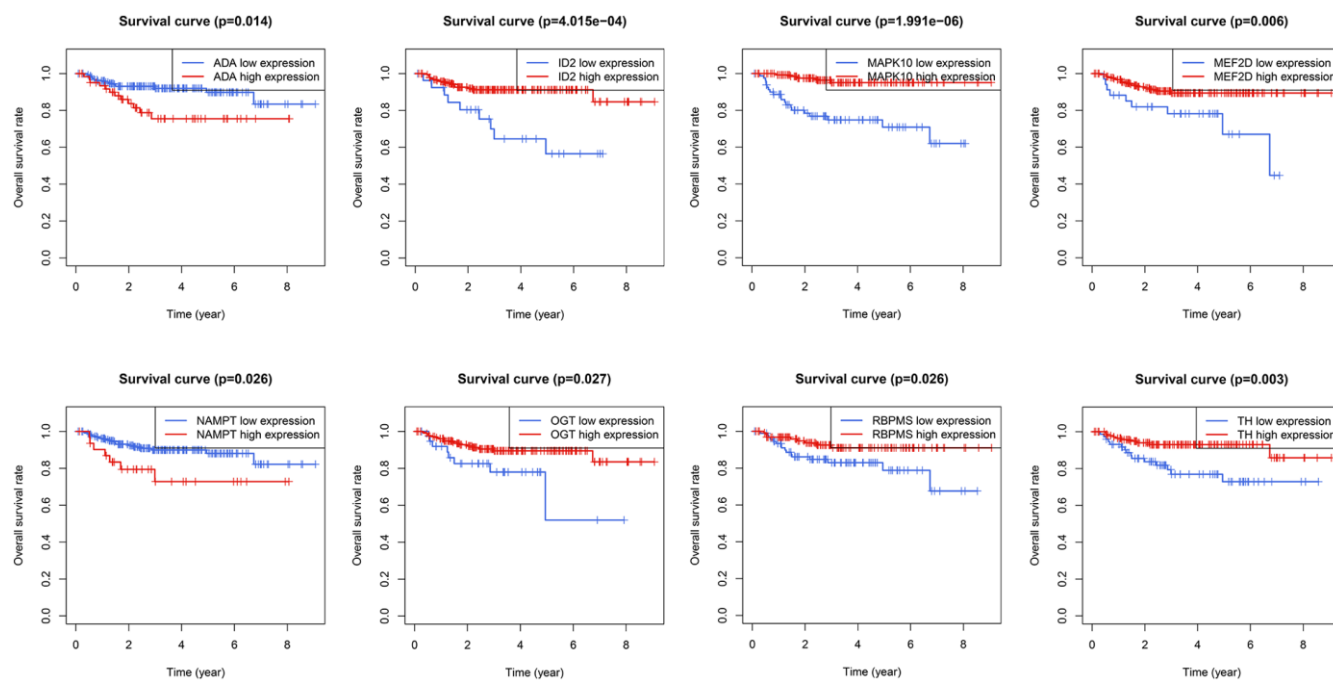

**Supplementary Figure 3. The prognostic values of the 16 CRRS genes in the GSE32894 cohort.**

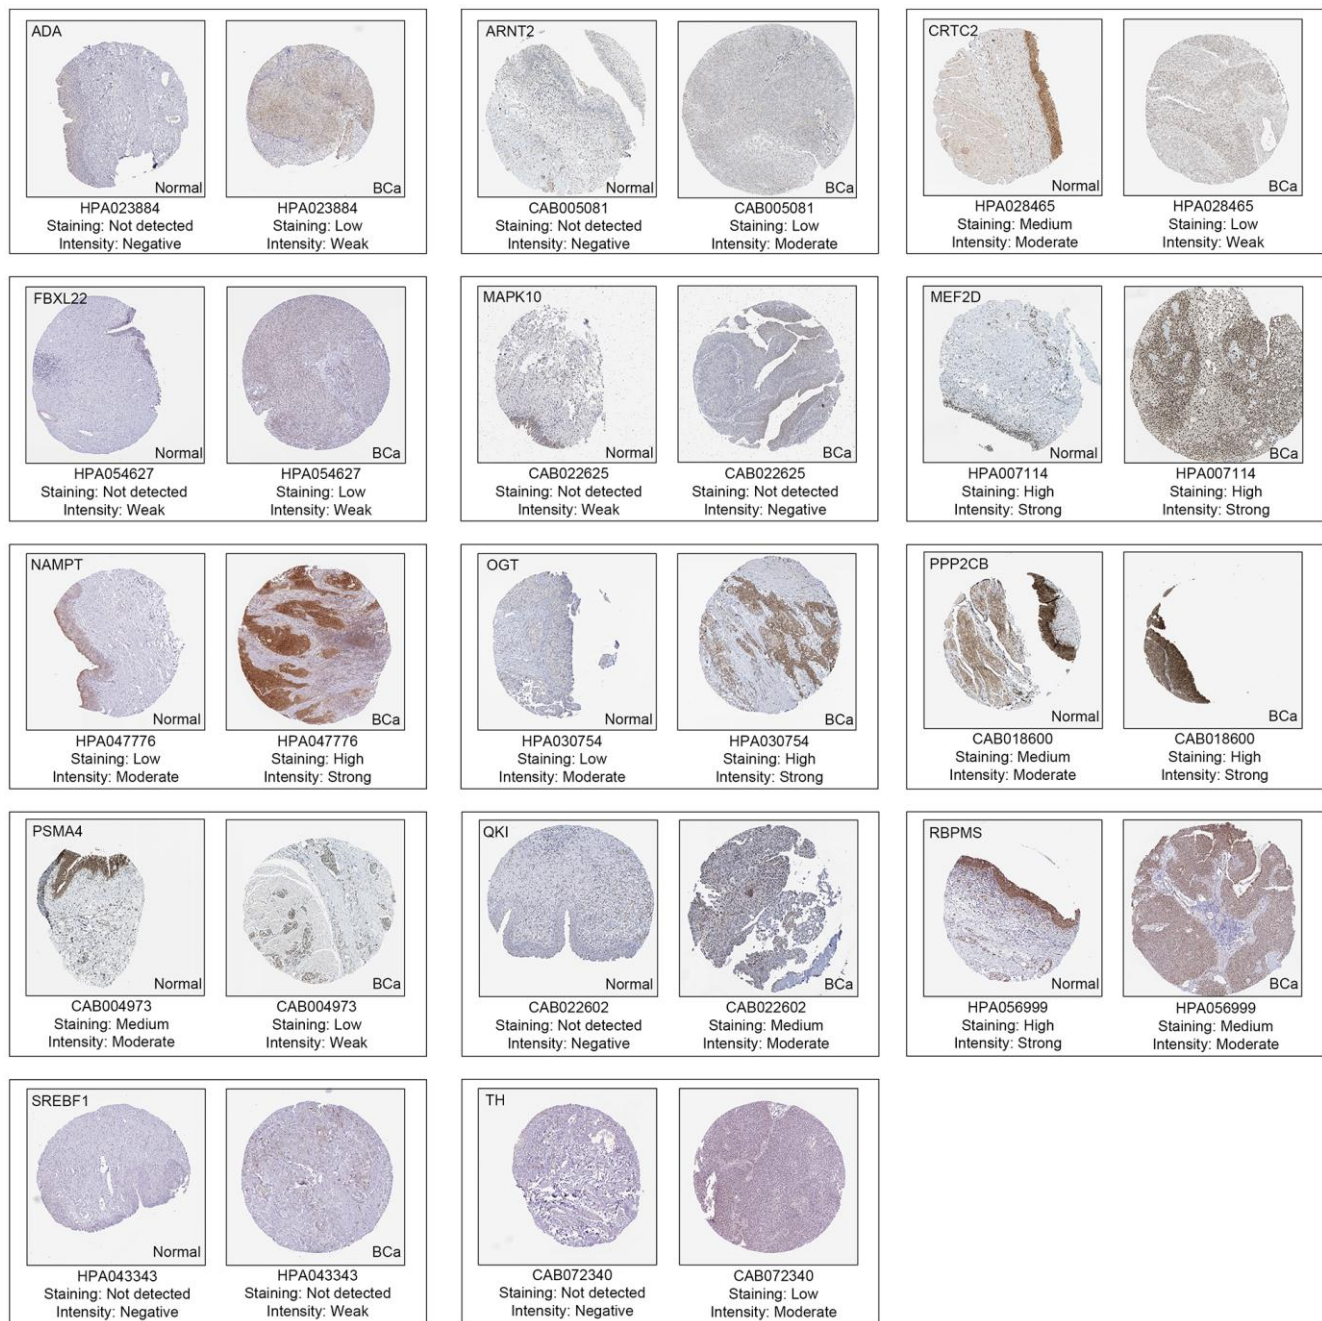

**Supplementary Figure 4. The immunohistochemical staining of the CRRS genes in human normal and BCa tissues.**

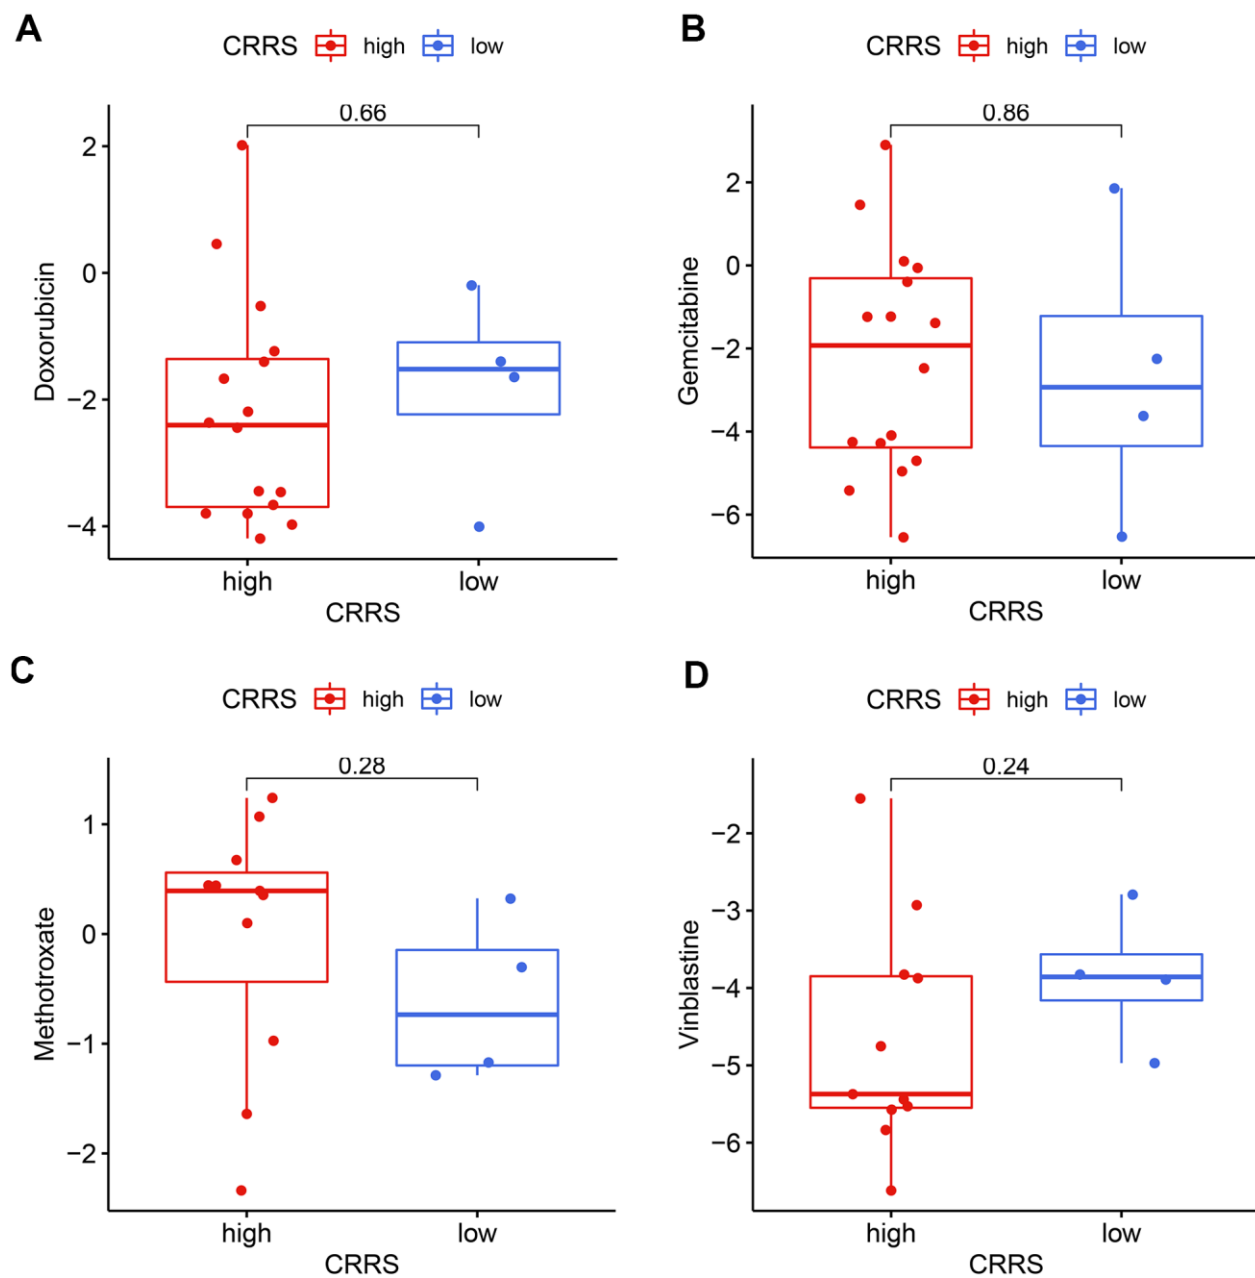

**Supplementary Figure 5.** The association between CRRS and the IC50 values of doxorubicin (A), gemcitabine (B), methotrexate (C), and vinblastine (D) in the BCa cell lines.
