# Supplementary material for: A circadian rhythm-related gene signature associated with tumor immunity, cisplatin efficacy, and prognosis in bladder cancer
Source: publisher site journal article supplement (doi:10.18632/aging.203733), 2021-12-03
Supplement: Supplementary file [file aging-v13i23-203733-supplementary-material-SD15.pdf]

**Supplementary Table 17. The GSEA results in the subgroup with low CRRS.**

| NAME                                       | GS<br> follow link to<br>MSigDB            | GS<br>DETAILS | SIZE | ES          | NES         | NOM p-val   | FDR q-val  | FWER<br>p-val | RANK<br>AT<br>MAX | LEADING<br>EDGE                      |
|--------------------------------------------|--------------------------------------------|---------------|------|-------------|-------------|-------------|------------|---------------|-------------------|--------------------------------------|
| HALLMARK_<br>OXIDATIVE_<br>PHOSPHORYLATION | HALLMARK_<br>OXIDATIVE_<br>PHOSPHORYLATION | Details ...   | 185  | -0.32739022 | -1.4821173  | 0.004026846 | 0.0662548  | 0.288         | 3605              | tags=27%,<br>list=18%,<br>signal=33% |
| HALLMARK_<br>BILE_ACID_<br>METABOLISM      | HALLMARK_<br>BILE_ACID_<br>METABOLISM      | Details ...   | 112  | -0.29618245 | -1.2587848  | 0.09154929  | 0.29479158 | 0.937         | 4446              | tags=33%,<br>list=23%,<br>signal=43% |
| HALLMARK_<br>PEROXISOME                    | HALLMARK_<br>PEROXISOME                    | Details ...   | 104  | -0.29905438 | -1.2510827  | 0.10557185  | 0.20794153 | 0.95          | 4667              | tags=33%,<br>list=24%,<br>signal=43% |
| HALLMARK_<br>DNA_REPAIR                    | HALLMARK_<br>DNA_REPAIR                    | Details ...   | 148  | -0.26814818 | -1.1834313  | 0.15096954  | 0.2667444  | 0.994         | 5692              | tags=38%,<br>list=29%,<br>signal=53% |
| HALLMARK_<br>FATTY_ACID_<br>METABOLISM     | HALLMARK_<br>FATTY_ACID_<br>METABOLISM     | Details ...   | 156  | -0.26005426 | -1.1436396  | 0.2021858   | 0.28168854 | 0.998         | 2758              | tags=21%,<br>list=14%,<br>signal=24% |
| HALLMARK_<br>ADIPOGENESIS                  | HALLMARK_<br>ADIPOGENESIS                  | Details ...   | 197  | -0.2361732  | -1.0680834  | 0.30717185  | 0.3783189  | 1             | 2588              | tags=19%,<br>list=13%,<br>signal=22% |
| HALLMARK_<br>SPERMATOGENESIS               | HALLMARK_<br>SPERMATOGENESIS               | Details ...   | 132  | -0.14034766 | -0.61015123 | 0.9958506   | 0.9962178  | 1             | 5174              | tags=23%,<br>list=26%,<br>signal=31% |
