# Supplementary material for: A circadian rhythm-related gene signature associated with tumor immunity, cisplatin efficacy, and prognosis in bladder cancer
Source: Aging (Albany NY). 2021 Dec 3;13(23):25153–79. doi: 10.18632/aging.203733 (PMC8714136; doi:10.18632/aging.203733)
Supplement: Supplementary Table 1 [file aging-13-203733-s002.xls]

## Sheet: genesets
Supplementary Table 1. The circadian rhythm-related gene sets collected from MSigDB.
BIOCARTA_CIRCADIAN_PATHWAY	> Circadian Rhythms	ARNTL	CLOCK	CRY1	CRY2	CSNK1E	PER1
WP_EXERCISEINDUCED_CIRCADIAN_REGULATION	> Exercise-induced Circadian Regulation	ARNTL	AZIN1	BTG1	CBX3	CEBPB	CLDN5	CLOCK	CRY1	CRY2	DAZAP2	DNAJA1	EIF4G2	ERC2	ETV6	G0S2	GFRA1	GSTM3	GSTP1	H2BC15	HERPUD1	HLA-DMA	HSPA8	IDI1	KLF9	MIR6883	MYF6	NCKAP1	NCOA4	NR1D2	PER1	PER2	PIGF	PPP1R3C	PPP2CB	PSMA4	PURA	QKI	RBPMS	SF3A3	STBD1	SUMO1	SUMO3	TAB2	TOB1	TUBB3	UCP3	UGP2	VAPA
WP_CIRCADIAN_RHYTHM_RELATED_GENES	> Circadian rhythm related genes	AANAT	ADA	ADCY1	ADIPOQ	ADORA1	ADORA2A	AGRP	AHCY	AHR	ARNT	ARNT2	ARNTL	ARNTL2	ATF4	ATF5	ATOH7	AVP	BHLHE40	BHLHE41	BTBD9	BTRC	CARTPT	CAVIN3	CCAR2	CDK4	CHRM1	CHRNB2	CIART	CIPC	CLDN4	CLOCK	CPT1A	CREB1	CREM	CRH	CRTC1	CRX	CRY1	CRY2	CSNK1D	CSNK1E	CST3	CUL1	DBP	DDC	DDX5	DHX9	DRD1
REACTOME_CIRCADIAN_CLOCK	> Circadian Clock	ARNTL	ARNTL2	ATF2	AVP	BHLHE40	BHLHE41	BTRC	CARM1	CHD9	CLOCK	CPT1A	CREB1	CREBBP	CREM	CRTC1	CRTC2	CRTC3	CRY1	CRY2	CSNK1D	CSNK1E	CUL1	DBP	ELOVL3	EP300	F7	FBXL3	HDAC3	HELZ2	HIF1A	KLF15	MED1	MEF2C	MEF2D	NAMPT	NCOA1	NCOA2	NCOA6	NCOR1	NFIL3	NOCT	NPAS2	NR1D1	NR3C1	NRIP1	PER1	PER2	PPARA
REACTOME_BMAL1_CLOCK_NPAS2_ACTIVATES_CIRCADIAN_GENE_EXPRESSION	> BMAL1:CLOCK,NPAS2 activates circadian gene expression	ARNTL	ARNTL2	AVP	BHLHE40	BHLHE41	CARM1	CHD9	CLOCK	CREBBP	DBP	F7	HELZ2	KLF15	MED1	NAMPT	NCOA1	NCOA2	NCOA6	NOCT	NPAS2	PPARA	RXRA	SERPINE1	SMARCD3	TBL1X	TBL1XR1	TGS1
PID_CIRCADIAN_PATHWAY	> Circadian rhythm pathway	ARNTL	ATR	BHLHE40	CHEK1	CLOCK	CRY1	CRY2	CSNK1E	DELEC1	NONO	NPAS2	NR1D1	PER1	PER2	TIMELESS	WDR5
KEGG_CIRCADIAN_RHYTHM_MAMMAL	> Circadian rhythm - mammal	ARNTL	BHLHE40	BHLHE41	CLOCK	CRY1	CRY2	CSNK1D	CSNK1E	NPAS2	NR1D1	PER1	PER2	PER3
GOBP_REGULATION_OF_CIRCADIAN_SLEEP_WAKE_CYCLE	> Any process that modulates the frequency, rate or extent of the circadian sleep/wake cycle. [GOC:jl]	ADA	ADORA1	ADORA2A	ADRB1	CHRNB2	CRH	CSF2	DRD2	DRD3	GHRH	GHRHR	GHRL	HCRTR2	MTNR1B	NLGN1	NMU	NPS	NPY2R	NR1D1	PER3	PTGDS
GOBP_REGULATION_OF_CIRCADIAN_RHYTHM	> Any process that modulates the frequency, rate or extent of a circadian rhythm. A circadian rhythm is a biological process in an organism that recurs with a regularity of approximately 24 hours. [GOC:dph, GOC:jl, GOC:tb]	ADA	ADCY1	ADORA1	ADORA2A	ADRB1	ARNTL	ARNTL2	ATG7	ATOH7	BHLHE40	BTRC	CCAR2	CDK1	CHRNB2	CIPC	CLOCK	CREB1	CREM	CRH	CRTC1	CRY1	CRY2	CSF2	CSNK1D	CSNK1E	DRD2	DRD3	DRD4	EZH2	FBXL12	FBXL17	FBXL21P	FBXL22	FBXL3	FBXL6	FBXL8	FBXW11	FBXW7	GHRH	GHRHR	GHRL	GNA11	GNAQ	GSK3B	HCRTR2	HDAC3	HNF4A	HNRNPD
GOBP_POSITIVE_REGULATION_OF_CIRCADIAN_RHYTHM	> Any process that activates or increases the frequency, rate or extent of a circadian rhythm behavior. [GOC:go_curators]	ADORA2A	ARNTL	ARNTL2	BTRC	CRH	FBXW11	GHRH	GHRHR	GHRL	MTNR1B	NKX2-1	NLGN1	NPS	NPY2R	RORA	RORC	THRAP3
GOBP_NEGATIVE_REGULATION_OF_CIRCADIAN_RHYTHM	> Any process that stops, prevents, or reduces the frequency, rate or extent of a circadian rhythm behavior. [GOC:go_curators]	ADA	ADORA1	CIPC	CRH	CRY1	CRY2	DRD2	GHRL	PASD1	PER2	PIWIL2	SFPQ	SIN3A	SUV39H1	SUV39H2
GOBP_ENTRAINMENT_OF_CIRCADIAN_CLOCK	> The synchronization of a circadian rhythm to environmental time cues such as light. [GOC:jid]	ARNTL2	ATOH7	BHLHE40	CRTC1	CRY1	CRY2	FBXL12	FBXL17	FBXL21P	FBXL22	FBXL3	FBXL6	FBXL8	GNA11	GNAQ	ID2	MTA1	NR2F6	OPN5	PDE6B	PER1	PER2	PER3	PHLPP1	PML	PPP1CA	PPP1CB	PPP1CC	RBM4	RBM4B	SIK1	SOX14	TP53	USP2
GOBP_CIRCADIAN_SLEEP_WAKE_CYCLE_SLEEP	> The part of the circadian sleep/wake cycle where the organism is asleep. [GOC:ai]	ADA	ADORA1	ADORA2A	ADRB1	BTBD9	CHRNB2	CRH	CSF2	DRD2	DRD3	GHRH	GHRHR	GHRL	MTNR1B	NMU	NPY2R	PER3	PTGDS	SRD5A1	STAR
GOBP_CIRCADIAN_SLEEP_WAKE_CYCLE_REM_SLEEP	> A stage in the circadian sleep cycle during which dreams occur and the body undergoes marked changes including rapid eye movement, loss of reflexes, and increased pulse rate and brain activity. [GOC:jl, ISBN:0395825172]	CHRNB2	CRH	GHRH	GHRL	SRD5A1	STAR
GOBP_CIRCADIAN_SLEEP_WAKE_CYCLE_NON_REM_SLEEP	> All sleep stages in the circadian sleep/wake cycle other than REM sleep. These stages are characterized by a slowing of brain waves and other physiological functions. [GOC:jl, http://www.sleepquest.com]	ADA	ADORA1	BTBD9	GHRHR	GHRL	MTNR1B	NPY2R
CIRCADIAN_RHYTHM_RELATED_GENES	> NA	ARNTL	CLOCK	CRY1	CRY2	CSNK1E	PER1	AZIN1	BTG1	CBX3	CEBPB	CLDN5	DAZAP2	DNAJA1	EIF4G2	ERC2	ETV6	G0S2	GFRA1	GSTM3	GSTP1	H2BC15	HERPUD1	HLA-DMA	HSPA8	IDI1	KLF9	MIR6883	MYF6	NCKAP1	NCOA4	NR1D2	PER2	PIGF	PPP1R3C	PPP2CB	PSMA4	PURA	QKI	RBPMS	SF3A3	STBD1	SUMO1	SUMO3	TAB2	TOB1	TUBB3	UCP3	UGP2
[truncated: 206 more columns]
