# Supplementary material for: A circadian rhythm-related gene signature associated with tumor immunity, cisplatin efficacy, and prognosis in bladder cancer
Source: Aging (Albany NY). 2021 Dec 3;13(23):25153–79. doi: 10.18632/aging.203733 (PMC8714136; doi:10.18632/aging.203733)
Supplement: Supplementary Table 3 [file aging-13-203733-s004.xls]

## Sheet: edgerOut_circadian
Supplementary Table 3. 122 circadian genes were differentially-expressed between adjacent normal and BCa samples.
gene	ensembol	logFC	logCPM	PValue	FDR
ARNTL	ENSG00000133794	-0.203791	2.91045	0.261	0.365
CLOCK	ENSG00000134852	-0.597442	5.00098	2.72e-05	0.000172
CRY1	ENSG00000008405	-0.436904	4.13756	0.00214	0.00721
CRY2	ENSG00000121671	-1.64429	4.7498	1.26e-45	3.83e-43
CSNK1E	ENSG00000213923	0.299245	7.27041	0.0381	0.0774
PER1	ENSG00000179094	-2.05053	5.79679	1.86e-23	1.2e-21
AZIN1	ENSG00000155096	0.134246	7.48969	0.454	0.562
BTG1	ENSG00000133639	-0.71009	7.2053	2.79e-05	0.000176
CBX3	ENSG00000122565	0.987202	7.75759	3.6e-15	1.16e-13
CEBPB	ENSG00000172216	-0.29131	6.55023	0.182	0.275
CLDN5	ENSG00000184113	-2.39128	3.95602	1.1e-19	5.34e-18
DAZAP2	ENSG00000183283	-0.0796291	7.98554	0.486	0.592
DNAJA1	ENSG00000086061	0.0784726	7.6318	0.681	0.762
EIF4G2	ENSG00000110321	-0.29217	9.73569	0.0137	0.0336
ERC2	ENSG00000187672	0.563736	-0.176885	0.275	0.381
ETV6	ENSG00000139083	0.178762	6.16068	0.254	0.357
G0S2	ENSG00000123689	-0.163466	4.501	0.636	0.725
GFRA1	ENSG00000151892	-3.17331	2.00776	5.21e-19	2.39e-17
GSTM3	ENSG00000134202	0.189838	6.96608	0.767	0.833
GSTP1	ENSG00000084207	0.371267	9.59343	0.13	0.209
HERPUD1	ENSG00000051108	-0.24894	6.47138	0.113	0.187
HLA-DMA	ENSG00000204257	0.130378	6.20735	0.716	0.792
HSPA8	ENSG00000109971	-0.185961	9.87124	0.295	0.402
IDI1	ENSG00000067064	-0.0762357	5.79307	0.644	0.732
KLF9	ENSG00000119138	-2.65838	5.06383	3.08e-36	4.75e-34
MYF6	ENSG00000111046	0.37503	-3.81882	0.653	0.739
NCKAP1	ENSG00000061676	-0.463324	7.44661	0.00135	0.0049
NCOA4	ENSG00000266412	-0.552318	7.2177	5.71e-05	0.000328
NR1D2	ENSG00000174738	-0.230603	5.44029	0.129	0.208
PER2	ENSG00000132326	-2.16146	4.25711	6.41e-43	1.46e-40
PIGF	ENSG00000151665	0.397506	3.80095	0.00807	0.0216
PPP1R3C	ENSG00000119938	-0.986421	4.88627	0.00904	0.0237
PPP2CB	ENSG00000104695	-0.785485	5.95597	2.2e-09	3.44e-08
PSMA4	ENSG00000041357	0.642473	7.30379	1.93e-06	1.64e-05
PURA	ENSG00000185129	-0.837085	4.81548	2.31e-12	5.58e-11
QKI	ENSG00000112531	-0.516019	6.10608	0.000904	0.0035
RBPMS	ENSG00000157110	-1.71831	6.32657	3.57e-18	1.51e-16
SF3A3	ENSG00000183431	0.202064	6.55473	0.076	0.136
STBD1	ENSG00000118804	-0.968599	2.16904	7.36e-07	6.9e-06
SUMO1	ENSG00000116030	0.328577	6.5633	0.00227	0.00757
SUMO3	ENSG00000184900	0.49775	6.64494	0.000517	0.00218
TAB2	ENSG00000055208	-0.517584	6.19063	1.5e-05	0.000102
TOB1	ENSG00000141232	-0.635502	7.0234	0.00891	0.0234
TUBB3	ENSG00000258947	2.43324	2.73534	8.58e-07	7.93e-06
UCP3	ENSG00000175564	0.49738	0.606337	0.0518	0.0995
UGP2	ENSG00000169764	-0.656646	6.57748	3.48e-09	5.25e-08
VAPA	ENSG00000101558	-0.115541	7.41449	0.373	0.483
ZFR	ENSG00000056097	-0.272138	6.30309	0.0153	0.0368
AANAT	ENSG00000129673	0.646949	-1.69677	0.0859	0.15
ADA	ENSG00000196839	1.02103	4.2185	0.00407	0.0123
ADCY1	ENSG00000164742	0.593609	2.90548	0.148	0.232
ADIPOQ	ENSG00000181092	-1.57045	1.49403	0.0535	0.102
ADORA1	ENSG00000163485	0.894541	1.21685	0.0276	0.0595
ADORA2A	ENSG00000128271	0.0286188	-2.18707	0.963	0.981
AGRP	ENSG00000159723	1.70927	-3.03206	4.09e-05	0.000245
AHCY	ENSG00000101444	0.89665	7.7527	1.25e-07	1.4e-06
AHR	ENSG00000106546	0.191703	7.89956	0.478	0.584
ARNT	ENSG00000143437	-0.281876	5.72221	0.0232	0.0517
ARNT2	ENSG00000172379	-1.0728	3.6013	0.000491	0.00209
ARNTL2	ENSG00000029153	1.12861	5.58649	0.000915	0.00354
ATF4	ENSG00000128272	-0.41336	8.2427	0.00122	0.00452
ATF5	ENSG00000169136	0.75554	5.94461	0.000759	0.00301
ATOH7	ENSG00000179774	1.54802	-2.03542	0.00164	0.00575
AVP	ENSG00000101200	2.31357	-3.05724	0.0375	0.0764
BHLHE40	ENSG00000134107	-0.710902	8.3885	0.00259	0.00842
BHLHE41	ENSG00000123095	0.331336	6.24686	0.358	0.468
BTBD9	ENSG00000183826	-0.352784	4.41345	0.00566	0.0161
BTRC	ENSG00000166167	-0.178457	4.57875	0.138	0.22
CAVIN3	ENSG00000170955	-0.714693	4.43897	0.0109	0.0277
CCAR2	ENSG00000158941	0.177426	6.488	0.189	0.283
CDK4	ENSG00000135446	0.759396	6.43295	6.28e-05	0.000357
CHRM1	ENSG00000168539	-0.0890705	-3.10688	0.786	0.847
CHRNB2	ENSG00000160716	2.91005	-0.388018	0.000144	0.00073
CIART	ENSG00000159208	-0.256715	2.219	0.391	0.501
CIPC	ENSG00000198894	-1.16001	4.63241	1.82e-19	8.68e-18
CLDN4	ENSG00000189143	-0.861261	9.58415	0.00524	0.0151
CPT1A	ENSG00000110090	-0.447664	6.10869	0.0531	0.102
CREB1	ENSG00000118260	-0.293011	5.17122	0.00577	0.0164
CREM	ENSG00000095794	-1.40186	4.43536	3.03e-19	1.42e-17
CRH	ENSG00000147571	1.68587	5.57544	0.221	0.319
CRTC1	ENSG00000105662	-0.298314	4.19743	0.0444	0.0876
CRX	ENSG00000105392	0.359107	-3.89618	0.665	0.748
CSNK1D	ENSG00000141551	-0.0934618	7.3894	0.306	0.413
CST3	ENSG00000101439	-0.128254	8.517	0.491	0.596
CUL1	ENSG00000055130	-0.102751	6.29962	0.316	0.424
DBP	ENSG00000105516	0.12246	3.71024	0.647	0.734
DDC	ENSG00000132437	3.43307	-0.0292804	0.00517	0.015
DDX5	ENSG00000108654	-0.374891	9.22792	0.00063	0.00258
DHX9	ENSG00000135829	0.136336	7.54611	0.232	0.332
DRD1	ENSG00000184845	-0.319391	1.56369	0.473	0.58
DRD2	ENSG00000149295	-0.122767	-1.77863	0.735	0.807
DRD4	ENSG00000069696	0.705989	0.113006	0.0395	0.0796
DYRK1A	ENSG00000157540	-0.205627	6.17756	0.0796	0.141
EGR1	ENSG00000120738	-3.36975	8.11882	3.26e-52	1.73e-49
EGR3	ENSG00000179388	-3.66714	3.77195	1.13e-45	3.5e-43
EP300	ENSG00000100393	-0.185983	6.43052	0.209	0.306
EZH2	ENSG00000106462	1.78398	4.94741	3.75e-12	8.77e-11
F7	ENSG00000057593	0.192843	-1.8656	0.83	0.883
FAS	ENSG00000026103	-0.305969	3.91813	0.257	0.36
FBXL3	ENSG00000005812	-0.452757	5.34532	0.000337	0.00152
FBXW11	ENSG00000072803	-0.554988	5.25238	5.89e-07	5.67e-06
GFPT1	ENSG00000198380	0.616049	6.65905	0.000612	0.00252
GHRH	ENSG00000118702	5.32477	1.88752	0.0462	0.0905
GHRL	ENSG00000157017	-0.362212	-0.85453	0.139	0.22
GNA11	ENSG00000088256	-0.420534	6.42582	0.000156	0.000784
GNAQ	ENSG00000156052	-0.955281	6.21259	1.49e-09	2.39e-08
GSK3B	ENSG00000082701	0.456697	6.06983	0.00014	0.000714
HCRTR1	ENSG00000121764	0.55034	-2.26814	0.183	0.275
HCRTR2	ENSG00000137252	1.30496	-3.34983	0.238	0.339
HDAC1	ENSG00000116478	0.387623	7.46171	0.00156	0.00552
HDAC2	ENSG00000196591	0.412624	6.99478	0.00335	0.0104
HDAC3	ENSG00000171720	0.21138	5.84767	0.0661	0.121
HEBP1	ENSG00000013583	0.00268084	5.50069	0.99	1
HNF1B	ENSG00000275410	1.13993	4.04063	0.082	0.144
HNRNPD	ENSG00000138668	0.163714	7.91195	0.194	0.288
HNRNPU	ENSG00000153187	-0.00517624	8.69586	0.939	0.963
HOMER1	ENSG00000152413	-0.222026	3.83049	0.255	0.358
HS3ST2	ENSG00000122254	0.230754	0.314964	0.66	0.745
HTR7	ENSG00000148680	0.684222	2.1422	0.239	0.34
ID2	ENSG00000115738	-1.06666	5.60787	2.56e-05	0.000163
ID3	ENSG00000117318	-0.40656	6.52148	0.134	0.214
ID4	ENSG00000172201	-0.892253	4.87492	0.0145	0.0352
IL6	ENSG00000136244	-3.43734	3.94619	2.32e-20	1.18e-18
JUN	ENSG00000177606	-2.12106	8.06967	5.65e-26	4.37e-24
JUND	ENSG00000130522	-1.36477	7.54661	3.69e-15	1.19e-13
KCND2	ENSG00000184408	1.22736	1.7695	0.00458	0.0135
KCNH7	ENSG00000184611	2.19491	-2.72235	0.00329	0.0103
KCNMA1	ENSG00000156113	-4.0924	3.94421	4.06e-59	3.17e-56
KDM5A	ENSG00000073614	-0.0684534	5.89931	0.577	0.674
KLF10	ENSG00000155090	-1.10304	6.04819	4.4e-08	5.4e-07
KMT2A	ENSG00000118058	-0.692339	5.83258	1.17e-08	1.59e-07
LEP	ENSG00000174697	-0.833628	0.413846	0.148	0.232
LGR4	ENSG00000205213	-0.220428	4.83539	0.335	0.445
MAGED1	ENSG00000179222	0.674069	7.7156	0.00332	0.0104
MAGEL2	ENSG00000254585	0.952933	0.0539823	0.117	0.192
MAPK10	ENSG00000109339	-0.732665	4.45625	0.00856	0.0227
MAPK8	ENSG00000107643	0.0716243	4.83979	0.591	0.686
MAPK9	ENSG00000050748	-0.25995	5.2446	0.0152	0.0366
METTL3	ENSG00000165819	0.576604	5.26586	3.74e-05	0.000226
MTA1	ENSG00000182979	0.443819	6.07849	0.000736	0.00294
MTNR1A	ENSG00000168412	1.01543	-3.95522	0.211	0.309
MTNR1B	ENSG00000134640	4.47693	-1.94552	8.56e-05	0.000468
MTTP	ENSG00000138823	-3.02183	-1.24957	9.32e-21	4.92e-19
MYBBP1A	ENSG00000132382	0.720815	6.53488	4.25e-06	3.33e-05
NAGLU	ENSG00000108784	0.372283	5.57774	0.018	0.0419
NAMPT	ENSG00000105835	-1.42687	7.30917	2.08e-10	3.82e-09
NCOA2	ENSG00000140396	-0.261	5.51807	0.101	0.171
NCOR1	ENSG00000141027	-0.502115	6.43313	0.000281	0.0013
NFIL3	ENSG00000165030	-1.9532	5.14026	1.56e-25	1.18e-23
NGFR	ENSG00000064300	-0.943267	3.49492	0.0274	0.0592
NKX2-1	ENSG00000136352	4.64472	0.522187	0.00256	0.00836
NLGN1	ENSG00000169760	-2.97582	0.651694	1.33e-18	5.82e-17
NOCT	ENSG00000151014	-0.476273	2.82343	0.0381	0.0773
NONO	ENSG00000147140	0.492746	8.56052	8.86e-05	0.000482
NOS2	ENSG00000007171	0.0587942	2.00138	1	1
NPAS2	ENSG00000170485	0.156272	5.87006	0.602	0.696
NR1D1	ENSG00000126368	-0.203222	4.73475	0.358	0.468
NR1H3	ENSG00000025434	-0.065816	4.88274	0.726	0.8
NR2F6	ENSG00000160113	0.91621	6.60188	7.36e-06	5.43e-05
NRIP1	ENSG00000180530	0.339778	5.90872	0.176	0.267
NTRK1	ENSG00000198400	0.395377	-0.439343	0.476	0.583
NTRK3	ENSG00000140538	-3.90573	0.637932	1.15e-34	1.54e-32
OGT	ENSG00000147162	0.697571	7.17108	0.000812	0.00319
OPN3	ENSG00000054277	0.955839	2.78296	0.00197	0.00671
OPN4	ENSG00000122375	-1.06177	-2.82876	0.0173	0.0406
OPRL1	ENSG00000125510	0.873529	1.60112	0.00517	0.015
PASD1	ENSG00000166049	3.25526	-0.478234	0.0775	0.138
PER3	ENSG00000049246	-1.51911	4.14309	4.9e-12	1.12e-10
PHLPP1	ENSG00000081913	-0.16147	4.89972	0.39	0.5
PML	ENSG00000140464	0.679303	6.85239	0.00111	0.00416
PPARA	ENSG00000186951	-0.774796	4.41346	7.38e-06	5.44e-05
PPARG	ENSG00000132170	0.600373	7.00282	0.153	0.239
PPARGC1A	ENSG00000109819	-1.91483	1.30574	4.81e-05	0.000283
PPP1CA	ENSG00000172531	0.804912	7.95827	2.14e-07	2.28e-06
PPP1CB	ENSG00000213639	-0.947747	8.16129	3.33e-16	1.18e-14
PPP1CC	ENSG00000186298	-0.057821	7.2052	0.595	0.689
PRF1	ENSG00000180644	0.607196	3.66027	0.229	0.329
PRKAA1	ENSG00000132356	-0.0041512	6.09579	0.953	0.973
PRKAA2	ENSG00000162409	-2.69016	1.97093	9.46e-18	3.85e-16
PRKCG	ENSG00000126583	1.50156	-1.96946	0.0792	0.14
PRKDC	ENSG00000253729	0.590909	7.85325	0.00406	0.0123
PRKG2	ENSG00000138669	0.204341	1.22831	0.553	0.652
PRMT5	ENSG00000100462	0.405549	5.67189	0.0252	0.0553
PROK1	ENSG00000143125	-1.25044	-1.36871	0.014	0.0343
PROK2	ENSG00000163421	-1.07717	-2.04579	0.0217	0.049
PROKR2	ENSG00000101292	2.64171	-3.09884	0.0608	0.113
PROX1	ENSG00000117707	-1.04611	2.00774	0.0153	0.0368
PSPC1	ENSG00000121390	0.224711	5.42892	0.0723	0.13
PTEN	ENSG00000171862	-0.459382	6.24914	0.000362	0.00161
PTGDS	ENSG00000107317	-2.2886	5.46165	1.42e-10	2.68e-09
RAI1	ENSG00000108557	0.0598793	6.15067	0.768	0.834
RBM4	ENSG00000173933	0.0870146	3.80293	0.467	0.574
RBM4B	ENSG00000173914	0.52876	4.27061	2.16e-05	0.000141
RELB	ENSG00000104856	0.0821584	5.10086	0.739	0.81
ROCK2	ENSG00000134318	-1.29323	5.91907	6.1e-27	5.16e-25
RORA	ENSG00000069667	-1.37138	3.22599	3.17e-09	4.84e-08
RORB	ENSG00000198963	-2.36355	0.216519	4.35e-10	7.61e-09
RORC	ENSG00000143365	0.208412	3.18032	0.755	0.824
RPS27A	ENSG00000143947	-0.158297	9.16536	0.245	0.347
SERPINE1	ENSG00000106366	0.0355205	8.16803	0.993	1
SETX	ENSG00000107290	-0.612275	6.06884	9.48e-07	8.66e-06
SFPQ	ENSG00000116560	0.108667	8.31113	0.233	0.334
SFTPC	ENSG00000168484	-1.447	-2.0347	0.0526	0.101
SIK1	ENSG00000142178	-1.58061	2.95317	0.000367	0.00163
SIN3A	ENSG00000169375	-0.359054	6.03117	0.000156	0.000786
SIRT1	ENSG00000096717	-1.01023	4.25939	9.03e-14	2.54e-12
SIX3	ENSG00000138083	1.96683	1.38193	0.0153	0.0368
SKP1	ENSG00000113558	-0.388636	7.61106	0.000163	0.000813
SLC6A4	ENSG00000108576	0.946159	0.740473	0.0978	0.166
SLC9A3	ENSG00000066230	0.229678	0.579619	0.624	0.714
SOX14	ENSG00000168875	7.9949	0.642918	0.00463	0.0137
SREBF1	ENSG00000072310	1.17665	7.65179	1.57e-05	0.000106
STAR	ENSG00000147465	0.380668	-0.664596	0.489	0.595
SUV39H1	ENSG00000101945	0.998363	4.0746	7.49e-07	7.02e-06
SUV39H2	ENSG00000152455	0.737693	3.71144	9.57e-06	6.86e-05
TH	ENSG00000180176	2.51638	3.65244	0.00315	0.00993
THRAP3	ENSG00000054118	-0.134787	7.13412	0.123	0.201
TIMELESS	ENSG00000111602	1.52471	5.94821	1.01e-14	3.13e-13
TNFRSF11A	ENSG00000141655	0.201226	2.6989	0.607	0.7
TOP1	ENSG00000198900	0.150862	6.74496	0.278	0.384
TOP2A	ENSG00000131747	2.07867	7.44738	1.65e-11	3.57e-10
TP53	ENSG00000141510	0.379157	6.31053	0.0885	0.153
TPH1	ENSG00000129167	-0.413609	-0.768533	0.211	0.308
TPH2	ENSG00000139287	1.19476	-4.0026	0.188	0.281
TYMS	ENSG00000176890	1.58857	5.52897	4.24e-08	5.22e-07
UBA52	ENSG00000221983	0.0931052	9.09246	0.538	0.638
UBC	ENSG00000150991	-0.757943	9.47375	2.84e-11	5.92e-10
UBE3A	ENSG00000114062	-0.356987	6.02523	0.00241	0.00793
USP2	ENSG00000036672	-1.99216	1.65342	2.13e-12	5.16e-11
UTS2	ENSG00000049247	1.98141	0.124111	0.0255	0.0556
UTS2R	ENSG00000181408	1.72832	-3.09133	0.0609	0.114
ZFHX3	ENSG00000140836	-0.263276	5.85558	0.182	0.274
ATF2	ENSG00000115966	-0.162	5.09845	0.174	0.265
CARM1	ENSG00000142453	0.109557	5.74541	0.414	0.523
CHD9	ENSG00000177200	-0.608847	5.16688	5.67e-05	0.000326
CREBBP	ENSG00000005339	-0.407228	6.31938	0.000786	0.00311
CRTC2	ENSG00000160741	0.671449	6.08944	4.13e-08	5.1e-07
CRTC3	ENSG00000140577	-0.903805	5.40936	1.32e-18	5.8e-17
ELOVL3	ENSG00000119915	2.12311	-0.111661	7.23e-05	0.000404
HELZ2	ENSG00000130589	0.758595	6.24499	0.0024	0.00792
HIF1A	ENSG00000100644	0.145782	7.61298	0.565	0.664
KLF15	ENSG00000163884	-1.29009	2.39326	0.000119	0.000622
MED1	ENSG00000125686	0.0850481	5.43527	0.622	0.713
MEF2C	ENSG00000081189	-1.89728	3.90089	4.98e-19	2.29e-17
MEF2D	ENSG00000116604	-1.28986	5.81677	8.64e-35	1.16e-32
NCOA1	ENSG00000084676	-0.498505	5.79588	0.00036	0.0016
NCOA6	ENSG00000198646	0.499606	6.41359	0.00142	0.00513
NR3C1	ENSG00000113580	-0.817304	5.11216	0.00113	0.00424
RXRA	ENSG00000186350	-0.145387	7.40655	0.414	0.524
SMARCD3	ENSG00000082014	-1.00273	4.034	5.17e-06	3.97e-05
TBL1X	ENSG00000101849	-1.29959	5.17704	1.03e-12	2.57e-11
TBL1XR1	ENSG00000177565	0.712896	7.44974	2.99e-05	0.000186
TGS1	ENSG00000137574	0.0129764	4.82633	0.948	0.97
UBB	ENSG00000170315	-0.113857	8.74157	0.457	0.565
USP46	ENSG00000109189	0.224013	4.78502	0.237	0.338
ATR	ENSG00000175054	0.467478	5.0173	0.000441	0.0019
CHEK1	ENSG00000149554	1.57427	4.58013	2.05e-12	4.97e-11
WDR5	ENSG00000196363	0.694691	5.83038	1.15e-05	8.05e-05
ADRB1	ENSG00000043591	0.559001	1.76796	0.312	0.42
CSF2	ENSG00000164400	2.86482	0.327569	0.00011	0.00058
GHRHR	ENSG00000106128	4.09924	-1.83808	0.00264	0.00856
NMU	ENSG00000109255	-0.205383	2.71339	0.586	0.682
ATG7	ENSG00000197548	0.459904	5.05729	0.00353	0.0109
CDK1	ENSG00000170312	2.35999	5.84362	1.49e-18	6.51e-17
FBXL12	ENSG00000127452	-0.0455711	4.52253	0.684	0.765
FBXL17	ENSG00000145743	-0.770519	4.38136	8.17e-09	1.15e-07
FBXL22	ENSG00000197361	-3.49396	1.82771	1.47e-55	9.83e-53
FBXL6	ENSG00000182325	1.75395	5.1931	1.06e-17	4.27e-16
FBXL8	ENSG00000135722	1.17331	2.80701	2.05e-08	2.67e-07
FBXW7	ENSG00000109670	-0.167196	4.33251	0.175	0.266
HNF4A	ENSG00000101076	3.40131	1.22517	0.000599	0.00247
KDM2A	ENSG00000173120	-0.0373171	7.25688	0.733	0.806
MTOR	ENSG00000198793	0.0926681	6.08827	0.458	0.566
OPN5	ENSG00000124818	-1.58254	-4.003	0.000497	0.00211
PDE6B	ENSG00000133256	-0.0981881	1.44409	0.733	0.805
PIWIL2	ENSG00000197181	0.454136	0.492115	0.5	0.605
SIAH2	ENSG00000181788	-0.132608	5.45396	0.312	0.42
SPSB4	ENSG00000175093	0.238009	-0.0849519	0.819	0.874
SRRD	ENSG00000100104	0.0994334	3.91349	0.471	0.578
TARDBP	ENSG00000120948	0.168035	6.99858	0.0267	0.0579
USP7	ENSG00000187555	-0.0838279	7.14877	0.538	0.638
USP9X	ENSG00000124486	-0.43731	7.02981	0.000452	0.00194
SRD5A1	ENSG00000145545	1.20601	4.67731	1.53e-05	0.000104
