# Supplementary material for: A circadian rhythm-related gene signature associated with tumor immunity, cisplatin efficacy, and prognosis in bladder cancer
Source: Aging (Albany NY). 2021 Dec 3;13(23):25153–79. doi: 10.18632/aging.203733 (PMC8714136; doi:10.18632/aging.203733)
Supplement: Supplementary Table 4 [file aging-13-203733-s005.xls]

## Sheet: uniCox
Supplementary Table 4. The univariate Cox regression of 1667 gene pairs.
id	HR	HR.95L	HR.95H	pvalue
CLOCK|CRY2	0.732746	0.498418	1.07724	0.113755
CLOCK|CLDN5	0.773879	0.563604	1.0626	0.113057
CLOCK|KLF9	0.665631	0.461065	0.960959	0.0298158
CLOCK|PER2	0.965184	0.696096	1.33829	0.831712
CLOCK|PPP1R3C	1.15898	0.840645	1.59786	0.367855
CLOCK|PURA	0.995992	0.717342	1.38288	0.980866
CLOCK|QKI	0.875111	0.586856	1.30495	0.512872
CLOCK|TUBB3	0.704271	0.491957	1.00821	0.0554564
CLOCK|ADA	0.779067	0.539695	1.12461	0.182546
CLOCK|ARNTL2	0.755618	0.49854	1.14526	0.186596
CLOCK|CREM	0.960336	0.690583	1.33546	0.809896
CLOCK|EGR3	0.913014	0.625978	1.33167	0.636519
CLOCK|ID4	1.3259	0.958843	1.83347	0.0880412
CLOCK|IL6	0.916213	0.659232	1.27337	0.602347
CLOCK|KMT2A	0.981611	0.714547	1.34849	0.908794
CLOCK|MAPK10	1.42642	1.01164	2.01126	0.0427681
CLOCK|OPN3	0.691262	0.487725	0.979738	0.0379863
CLOCK|PER3	0.99766	0.706055	1.4097	0.989402
CLOCK|PTGDS	0.747917	0.524105	1.0673	0.109387
CLOCK|SUV39H1	1.36304	0.944295	1.96748	0.0981493
CLOCK|SUV39H2	0.782853	0.545477	1.12353	0.184148
CLOCK|TH	1.03804	0.711474	1.5145	0.846399
CLOCK|CHD9	1.04004	0.740423	1.4609	0.820853
CLOCK|KLF15	1.47316	0.971921	2.23288	0.0678894
CLOCK|NR3C1	0.849192	0.615361	1.17188	0.319842
CLOCK|SMARCD3	0.868508	0.632259	1.19303	0.384117
CLOCK|TBL1X	0.999212	0.682357	1.4632	0.996766
CLOCK|CHEK1	0.73874	0.51917	1.05117	0.0924436
CLOCK|FBXL17	1.00378	0.730859	1.37863	0.981387
CLOCK|FBXL8	1.27714	0.919647	1.7736	0.144286
CLOCK|SRD5A1	0.890463	0.646523	1.22644	0.477533
CRY2|CLDN5	0.991536	0.694651	1.41531	0.962659
CRY2|KLF9	0.899212	0.652002	1.24015	0.517172
CRY2|PER2	1.05398	0.710321	1.56391	0.793994
CRY2|PPP1R3C	1.19504	0.869933	1.64166	0.271389
CRY2|QKI	1.00315	0.729682	1.3791	0.984564
CRY2|RBPMS	1.51253	1.06626	2.14557	0.0203616
CRY2|ADA	1.03158	0.749843	1.41918	0.848477
CRY2|ARNTL2	0.949257	0.688735	1.30833	0.75038
CRY2|CAVIN3	0.783907	0.525676	1.16899	0.232427
CRY2|CIPC	1.21444	0.881861	1.67246	0.234064
CRY2|CREM	1.07208	0.776221	1.48071	0.672695
CRY2|EZH2	1.04875	0.732804	1.5009	0.794687
CRY2|ID4	1.41195	1.0269	1.94138	0.0337234
CRY2|IL6	1.03268	0.717322	1.48667	0.862694
CRY2|MAPK10	1.74449	1.11955	2.7183	0.0139341
CRY2|NCOR1	1.09632	0.781658	1.53764	0.594199
CRY2|PTGDS	0.841702	0.602563	1.17575	0.312236
CRY2|RBM4B	1.12793	0.815805	1.55948	0.466412
CRY2|ROCK2	0.941674	0.647771	1.36892	0.752886
CRY2|SETX	1.4774	1.06024	2.0587	0.0211373
CRY2|SIRT1	1.12881	0.821689	1.55073	0.454557
CRY2|SUV39H1	1.16046	0.838989	1.60511	0.368547
CRY2|SUV39H2	0.914362	0.665777	1.25576	0.580215
CRY2|CRTC3	0.974643	0.709665	1.33856	0.873934
CRY2|HELZ2	1.38255	0.999027	1.91332	0.0506907
CRY2|NR3C1	0.81215	0.58614	1.12531	0.211131
CRY2|SMARCD3	1.04148	0.723742	1.49872	0.826749
CRY2|TBL1X	1.18167	0.858847	1.62582	0.305216
CRY2|CHEK1	0.857815	0.624373	1.17854	0.343979
CRY2|FBXL17	1.14164	0.773079	1.6859	0.505426
CRY2|SRD5A1	0.917937	0.663021	1.27086	0.605943
BTG1|NCOA4	0.825923	0.585637	1.1648	0.275577
BTG1|PSMA4	0.816632	0.593829	1.12303	0.212702
BTG1|TOB1	1.0812	0.77338	1.51154	0.647888
BTG1|ATF5	0.851941	0.606161	1.19738	0.356162
BTG1|CDK4	0.623886	0.452236	0.860686	0.00405542
BTG1|EGR1	0.729056	0.514539	1.03301	0.0755154
BTG1|ID2	1.344	0.921361	1.9605	0.124838
BTG1|JUN	0.525098	0.334111	0.825259	0.00522926
BTG1|MAGED1	0.728434	0.522564	1.01541	0.0615222
BTG1|MYBBP1A	0.746179	0.521521	1.06761	0.109158
BTG1|NR2F6	1.00318	0.725723	1.3867	0.984685
BTG1|OGT	1.12592	0.768612	1.64934	0.5426
BTG1|SREBF1	0.728575	0.529422	1.00264	0.0519244
BTG1|TOP2A	0.808044	0.588447	1.10959	0.187748
BTG1|TYMS	0.651289	0.464257	0.913667	0.013038
BTG1|CRTC2	0.914692	0.650787	1.28561	0.607667
BTG1|TBL1XR1	1.08294	0.73639	1.59259	0.685521
BTG1|WDR5	0.809274	0.567282	1.1545	0.243039
BTG1|CDK1	0.909395	0.62103	1.33166	0.625502
CBX3|NCOA4	0.832174	0.589914	1.17392	0.295319
CBX3|TOB1	1.11444	0.804962	1.54291	0.513869
CBX3|AHCY	0.663381	0.474554	0.927344	0.0163362
CBX3|BHLHE40	0.825643	0.575615	1.18427	0.297873
CBX3|EGR1	0.6537	0.475931	0.89787	0.00865838
CBX3|JUN	0.915598	0.664827	1.26096	0.589198
CBX3|JUND	1.18474	0.817941	1.71603	0.369817
CBX3|MAGED1	0.613955	0.439922	0.856836	0.00412449
CBX3|NR2F6	1.00364	0.710241	1.41825	0.983552
CBX3|PPP1CB	0.889489	0.646775	1.22328	0.471328
CLDN5|KLF9	0.837802	0.569795	1.23187	0.368247
CLDN5|PER2	1.04456	0.760512	1.43469	0.78775
CLDN5|PPP1R3C	1.28212	0.929069	1.76934	0.130467
CLDN5|PURA	1.09875	0.79993	1.50919	0.560898
CLDN5|QKI	0.985777	0.700454	1.38732	0.934514
CLDN5|STBD1	1.17883	0.823984	1.68648	0.367908
CLDN5|TUBB3	1.14369	0.797343	1.64049	0.465704
CLDN5|ADA	1.1111	0.79709	1.54882	0.534146
CLDN5|ARNT2	1.18054	0.812291	1.71574	0.384249
CLDN5|ARNTL2	0.821877	0.569311	1.18649	0.295028
CLDN5|CIPC	1.20004	0.857194	1.68001	0.288096
CLDN5|CREM	1.04448	0.750305	1.45399	0.796522
CLDN5|EGR3	0.966459	0.669486	1.39516	0.855479
CLDN5|EZH2	1.35973	0.938415	1.97021	0.104369
CLDN5|ID4	1.48451	1.0751	2.04983	0.0164034
CLDN5|IL6	1.0564	0.755855	1.47645	0.748041
CLDN5|KMT2A	1.02078	0.74232	1.4037	0.899298
CLDN5|MAPK10	1.38411	0.998093	1.91943	0.0513524
CLDN5|METTL3	1.40914	0.965879	2.05581	0.0751077
CLDN5|NCOR1	1.09053	0.752885	1.57959	0.646644
CLDN5|OPN3	0.907433	0.658907	1.2497	0.551929
CLDN5|PER3	1.17288	0.846896	1.62433	0.337175
CLDN5|PPARA	1.07058	0.768146	1.49209	0.6872
CLDN5|PTGDS	0.745768	0.488307	1.13897	0.174563
CLDN5|RBM4B	1.24612	0.879467	1.76564	0.215873
CLDN5|ROCK2	1.09742	0.746271	1.6138	0.636581
CLDN5|SETX	1.05217	0.721044	1.53536	0.791977
CLDN5|SIK1	1.31559	0.901531	1.91982	0.154911
CLDN5|SIRT1	1.01003	0.714234	1.42833	0.954977
CLDN5|SUV39H1	1.27186	0.90187	1.79363	0.170348
CLDN5|SUV39H2	1.1498	0.82387	1.60468	0.411773
CLDN5|TH	1.30957	0.897658	1.9105	0.161617
CLDN5|CHD9	0.978751	0.712554	1.34439	0.894492
CLDN5|CRTC3	1.04653	0.736974	1.48612	0.799343
CLDN5|HELZ2	1.24429	0.874167	1.77112	0.224989
CLDN5|KLF15	1.42627	0.96987	2.09744	0.0711558
CLDN5|NR3C1	1.07649	0.783889	1.47831	0.648795
CLDN5|SMARCD3	0.977626	0.711657	1.343	0.88892
CLDN5|TBL1X	1.19126	0.8438	1.68181	0.319886
CLDN5|CHEK1	1.01617	0.727143	1.42008	0.925163
CLDN5|FBXL17	1.18301	0.861031	1.6254	0.299799
CLDN5|FBXL8	1.24106	0.902543	1.70656	0.183853
CLDN5|SRD5A1	1.18886	0.864475	1.63496	0.287268
GFRA1|AGRP	1.18664	0.86317	1.63134	0.291959
GFRA1|ATOH7	1.43461	1.04149	1.97612	0.0271928
GFRA1|CHRNB2	0.989855	0.698661	1.40241	0.954253
GFRA1|DDC	0.833929	0.581342	1.19626	0.323882
GFRA1|KCNMA1	0.747704	0.506266	1.10428	0.143912
GFRA1|MTNR1B	1.27711	0.875563	1.86281	0.204089
GFRA1|MTTP	0.965058	0.684227	1.36115	0.839365
GFRA1|NKX2-1	1.15156	0.802427	1.65261	0.443863
GFRA1|NLGN1	1.09625	0.786436	1.52813	0.587615
GFRA1|OPN4	1.00532	0.686374	1.47247	0.978273
GFRA1|PPARGC1A	0.93088	0.665029	1.30301	0.676362
GFRA1|PRKAA2	1.07292	0.774439	1.48643	0.67219
GFRA1|PROK1	0.946962	0.683366	1.31223	0.743354
GFRA1|PROK2	0.856604	0.61905	1.18532	0.35029
GFRA1|PROX1	1.24835	0.908738	1.71488	0.170923
GFRA1|RORB	0.98769	0.703129	1.38741	0.943047
GFRA1|SIK1	1.13689	0.807945	1.59975	0.46161
GFRA1|SIX3	1.20176	0.872225	1.65579	0.261041
GFRA1|TH	1.4171	1.02282	1.96336	0.0361157
GFRA1|USP2	0.809303	0.540053	1.21279	0.305279
GFRA1|ELOVL3	0.863815	0.607	1.22929	0.416085
GFRA1|CSF2	1.31124	0.944223	1.8209	0.105794
GFRA1|HNF4A	0.769814	0.553612	1.07045	0.119889
KLF9|PER2	1.00021	0.694398	1.44071	0.999087
KLF9|PPP1R3C	1.28613	0.935054	1.76902	0.121837
KLF9|PURA	1.36923	0.934402	2.00641	0.106976
KLF9|QKI	0.959483	0.697268	1.32031	0.799538
KLF9|RBPMS	1.30884	0.943953	1.81478	0.106515
KLF9|ADA	1.11264	0.810013	1.52833	0.509887
KLF9|ARNTL2	1.26435	0.917896	1.74158	0.151112
KLF9|CIPC	1.1682	0.849997	1.60553	0.337945
KLF9|CREM	1.39483	0.995782	1.9538	0.0529437
KLF9|EZH2	1.45735	1.05327	2.01645	0.0230115
KLF9|FBXW11	1.03216	0.728625	1.46214	0.858604
KLF9|ID4	1.56888	1.12939	2.17939	0.0072411
KLF9|IL6	1.03873	0.696618	1.54885	0.852129
KLF9|KMT2A	1.14857	0.806234	1.63628	0.44299
KLF9|MAPK10	1.95553	1.32436	2.88752	0.000744174
KLF9|METTL3	1.35331	0.978034	1.87259	0.0678617
KLF9|NCOR1	1.14612	0.831203	1.58035	0.405385
KLF9|OPN3	0.961827	0.653847	1.41488	0.843325
KLF9|PML	1.47358	1.02945	2.10931	0.0341282
KLF9|PTGDS	1.00254	0.721237	1.39356	0.987946
KLF9|RBM4B	1.36009	0.990299	1.86797	0.0574661
KLF9|ROCK2	1.13017	0.815807	1.56566	0.461851
KLF9|SETX	1.27784	0.926484	1.76243	0.135045
KLF9|SIRT1	1.20052	0.871655	1.65345	0.263166
KLF9|SUV39H1	1.40025	1.01946	1.92328	0.0376206
KLF9|SUV39H2	1.0941	0.794076	1.50747	0.582363
KLF9|TH	1.08478	0.73405	1.6031	0.682982
KLF9|CHD9	1.2126	0.816626	1.80058	0.339239
KLF9|CRTC3	1.08009	0.783428	1.48909	0.638185
KLF9|HELZ2	1.31785	0.957007	1.81474	0.0908828
KLF9|KLF15	1.55031	0.977644	2.45844	0.0623424
KLF9|NR3C1	0.959398	0.680845	1.35191	0.812757
KLF9|SMARCD3	1.19454	0.832435	1.71415	0.334709
KLF9|TBL1X	1.42935	1.03859	1.96713	0.0283554
KLF9|CHEK1	1.14673	0.832614	1.57936	0.40184
KLF9|FBXL17	1.51789	1.032	2.23256	0.0340093
KLF9|FBXL8	1.31222	0.902702	1.90751	0.15455
KLF9|SRD5A1	1.09215	0.781146	1.52699	0.606189
NCOA4|PSMA4	1.09551	0.744781	1.61141	0.643131
NCOA4|TOB1	1.28089	0.9318	1.76076	0.127295
NCOA4|AHCY	1.05633	0.715117	1.56034	0.78308
NCOA4|BHLHE40	0.965786	0.650711	1.43342	0.862815
NCOA4|CDK4	0.738042	0.527245	1.03312	0.0767112
NCOA4|EGR1	0.861897	0.626592	1.18557	0.360934
NCOA4|ID2	1.68872	1.07491	2.65303	0.0230026
NCOA4|JUN	0.754395	0.52267	1.08886	0.132247
NCOA4|MAGED1	0.979399	0.711756	1.34768	0.898295
NCOA4|NR2F6	1.12011	0.813558	1.54216	0.486913
NCOA4|PPP1CB	1.11912	0.770033	1.62647	0.555187
NCOA4|SREBF1	0.722833	0.515453	1.01365	0.0599189
NCOA4|TOP2A	1.03082	0.724484	1.46668	0.866039
PER2|PPP1R3C	1.18436	0.85745	1.63592	0.304542
PER2|PURA	1.2078	0.879246	1.65912	0.24381
PER2|QKI	0.869545	0.586018	1.29025	0.48751
PER2|STBD1	1.03563	0.712137	1.50607	0.854625
PER2|TUBB3	0.811006	0.575014	1.14385	0.232502
PER2|ADA	0.842567	0.581753	1.22031	0.364709
PER2|ARNT2	1.43618	0.957495	2.15416	0.0801213
PER2|ARNTL2	0.879334	0.583392	1.3254	0.539046
PER2|CREM	0.985138	0.699963	1.3865	0.931569
PER2|EGR3	0.896611	0.627774	1.28057	0.548445
PER2|ID4	1.2863	0.922527	1.79353	0.137676
PER2|IL6	0.855153	0.619461	1.18052	0.341519
PER2|KMT2A	1.28621	0.934156	1.77094	0.122942
PER2|MAPK10	1.48656	1.0543	2.09604	0.023721
PER2|OPN3	0.834838	0.601973	1.15778	0.279299
PER2|PER3	1.17148	0.839408	1.63491	0.352055
PER2|PPARA	1.24297	0.858366	1.7999	0.249549
PER2|PTGDS	0.787147	0.54856	1.1295	0.193938
PER2|SUV39H2	0.874921	0.607998	1.25903	0.471792
PER2|TH	1.21673	0.837198	1.76831	0.303762
PER2|CHD9	1.00583	0.731133	1.38375	0.971484
PER2|KLF15	1.23605	0.858878	1.77886	0.253896
PER2|MEF2C	0.820499	0.552833	1.21776	0.326083
PER2|NR3C1	0.864907	0.619679	1.20718	0.393576
PER2|SMARCD3	0.98354	0.714583	1.35373	0.918895
PER2|CHEK1	0.951636	0.667005	1.35773	0.784549
PER2|FBXL17	1.16534	0.844935	1.60724	0.35093
PER2|FBXL8	1.36173	0.987247	1.87826	0.0598714
PER2|SRD5A1	0.974727	0.705062	1.34753	0.876893
PPP1R3C|PPP2CB	0.659776	0.452071	0.962912	0.031092
PPP1R3C|PURA	0.904702	0.65072	1.25781	0.551391
PPP1R3C|QKI	0.798117	0.581175	1.09604	0.163516
PPP1R3C|RBPMS	0.84827	0.60848	1.18256	0.331663
PPP1R3C|TAB2	0.62622	0.423797	0.925328	0.018797
PPP1R3C|TUBB3	0.824655	0.579257	1.17401	0.284723
PPP1R3C|UGP2	0.662713	0.448637	0.978939	0.0387434
PPP1R3C|ADA	0.790693	0.574216	1.08878	0.150197
PPP1R3C|ARNTL2	0.810235	0.588837	1.11488	0.196289
PPP1R3C|ATF5	0.704049	0.467103	1.06119	0.0936871
PPP1R3C|CAVIN3	0.799616	0.570083	1.12157	0.195187
PPP1R3C|CIPC	0.931037	0.677684	1.27911	0.659254
PPP1R3C|CREM	0.922537	0.670985	1.2684	0.619649
PPP1R3C|EGR3	0.760233	0.5381	1.07407	0.12001
PPP1R3C|EZH2	0.769186	0.554008	1.06794	0.117026
PPP1R3C|FBXW11	0.788327	0.56835	1.09344	0.154212
PPP1R3C|GFPT1	0.562337	0.383966	0.823571	0.00310587
PPP1R3C|GNAQ	0.611345	0.420396	0.889024	0.0100051
PPP1R3C|ID2	1.0615	0.730148	1.54322	0.754583
PPP1R3C|ID4	1.01319	0.737064	1.39276	0.935669
PPP1R3C|IL6	0.998508	0.711976	1.40035	0.993096
PPP1R3C|KLF10	0.650406	0.451973	0.935958	0.0205387
PPP1R3C|KMT2A	0.897952	0.649114	1.24218	0.515617
PPP1R3C|MAPK10	0.868446	0.597378	1.26251	0.459984
PPP1R3C|METTL3	0.800147	0.578209	1.10727	0.178568
PPP1R3C|MYBBP1A	0.733837	0.506573	1.06306	0.101718
PPP1R3C|NAMPT	0.731079	0.513702	1.04044	0.0819008
PPP1R3C|NCOR1	0.836671	0.606947	1.15334	0.276222
PPP1R3C|NFIL3	0.613014	0.423248	0.887862	0.0096177
PPP1R3C|OGT	0.878384	0.606308	1.27255	0.492963
PPP1R3C|OPN3	0.861846	0.61814	1.20163	0.380611
PPP1R3C|PER3	0.926818	0.660784	1.29996	0.659747
PPP1R3C|PML	0.859527	0.620428	1.19077	0.362741
PPP1R3C|PPARA	1.01141	0.711961	1.4368	0.949512
PPP1R3C|PRKDC	0.5898	0.404248	0.860521	0.00615592
PPP1R3C|PTGDS	0.784455	0.567047	1.08522	0.142627
PPP1R3C|RBM4B	0.840488	0.611213	1.15577	0.284968
PPP1R3C|ROCK2	0.846326	0.612614	1.1692	0.311578
PPP1R3C|SETX	0.936473	0.680401	1.28892	0.687162
PPP1R3C|SIK1	1.17518	0.797452	1.73181	0.414548
PPP1R3C|SIRT1	0.911143	0.663465	1.25128	0.565328
PPP1R3C|SUV39H1	0.832283	0.604768	1.14539	0.259834
PPP1R3C|SUV39H2	0.760157	0.553313	1.04433	0.0905857
PPP1R3C|TIMELESS	0.799538	0.567749	1.12596	0.200267
PPP1R3C|TOP2A	0.755219	0.503778	1.13216	0.174119
PPP1R3C|TYMS	0.706325	0.489178	1.01986	0.0635936
PPP1R3C|CHD9	1.01115	0.724053	1.4121	0.948098
PPP1R3C|CRTC2	0.727483	0.479571	1.10355	0.13452
PPP1R3C|CRTC3	0.886355	0.645314	1.21743	0.456276
PPP1R3C|HELZ2	0.771376	0.560837	1.06095	0.110453
PPP1R3C|MEF2C	0.918463	0.624556	1.35068	0.665559
PPP1R3C|MEF2D	0.731469	0.518562	1.03179	0.0748058
PPP1R3C|NR3C1	0.770954	0.561345	1.05883	0.108089
PPP1R3C|SMARCD3	0.944561	0.680564	1.31096	0.733085
PPP1R3C|TBL1X	0.917896	0.668125	1.26104	0.597033
PPP1R3C|TBL1XR1	0.661696	0.441322	0.992113	0.0456864
PPP1R3C|CHEK1	0.851292	0.619877	1.1691	0.319878
PPP1R3C|WDR5	0.722737	0.495151	1.05493	0.0924081
PPP1R3C|CDK1	0.780812	0.544167	1.12037	0.179266
PPP1R3C|FBXL17	0.851135	0.616029	1.17597	0.328455
PPP1R3C|FBXL6	0.770152	0.542479	1.09338	0.144102
PPP1R3C|FBXL8	0.955017	0.687036	1.32753	0.784156
PPP1R3C|SRD5A1	0.836841	0.608604	1.15067	0.272981
PPP2CB|RBPMS	1.34927	0.878648	2.07198	0.171055
PPP2CB|TAB2	1.19799	0.870616	1.64846	0.267343
PPP2CB|UGP2	1.47066	1.071	2.01947	0.0171312
PPP2CB|ATF5	1.21719	0.873491	1.69612	0.245646
PPP2CB|CAVIN3	0.996986	0.713305	1.39349	0.985901
PPP2CB|GFPT1	0.999916	0.718196	1.39214	0.999605
PPP2CB|GNAQ	1.12205	0.792232	1.58916	0.516692
PPP2CB|ID2	1.70025	1.23354	2.34354	0.00118708
PPP2CB|ID4	1.8036	1.15663	2.81246	0.00927081
PPP2CB|KLF10	1.16326	0.847051	1.59752	0.350114
PPP2CB|MYBBP1A	1.25844	0.916	1.72889	0.156036
PPP2CB|NAMPT	1.18275	0.859211	1.62811	0.303316
PPP2CB|NFIL3	0.795395	0.578962	1.09274	0.157751
PPP2CB|OGT	1.7141	1.2315	2.38582	0.00140182
PPP2CB|PML	1.61118	1.06299	2.44207	0.024587
PPP2CB|PRKDC	0.99987	0.728021	1.37323	0.999358
PPP2CB|PTGDS	1.0371	0.730429	1.47251	0.838627
PPP2CB|SREBF1	1.08443	0.774492	1.51839	0.636967
PPP2CB|TIMELESS	1.43999	1.01445	2.04403	0.0413275
PPP2CB|TOP2A	1.02436	0.699648	1.49978	0.901511
PPP2CB|TYMS	1.04919	0.756471	1.45517	0.773578
PPP2CB|CRTC2	1.75343	1.26293	2.43443	0.00079575
PPP2CB|TBL1XR1	1.50721	1.09478	2.07503	0.011901
PPP2CB|WDR5	1.20654	0.876867	1.66016	0.248898
PPP2CB|CDK1	1.20783	0.87825	1.66109	0.245467
PPP2CB|FBXL6	1.22782	0.872175	1.72848	0.239521
PSMA4|TOB1	0.987742	0.695881	1.40201	0.944974
PSMA4|ATF5	0.815504	0.582131	1.14243	0.235715
PSMA4|CDK4	0.612299	0.427993	0.875971	0.00725907
PSMA4|EGR1	0.637221	0.439782	0.923298	0.0172307
PSMA4|ID2	1.48464	1.04067	2.11803	0.0292672
PSMA4|KLF10	0.706261	0.501668	0.994292	0.0462871
PSMA4|MAGED1	0.822698	0.579318	1.16833	0.275446
PSMA4|MYBBP1A	0.644744	0.44409	0.93606	0.0210367
PSMA4|NAMPT	0.454683	0.321182	0.643673	8.82297e-06
PSMA4|NFIL3	0.822854	0.556489	1.21672	0.328555
PSMA4|NR2F6	1.17738	0.838247	1.6537	0.346174
PSMA4|OGT	1.08014	0.719809	1.62085	0.709686
PSMA4|PRKDC	0.620962	0.434204	0.888049	0.00904318
PSMA4|SREBF1	0.670903	0.488563	0.921296	0.0136423
PSMA4|TOP2A	0.758865	0.548678	1.04957	0.0953976
PSMA4|TYMS	0.770678	0.552052	1.07588	0.12595
PSMA4|CRTC2	1.20867	0.855055	1.70852	0.283172
PSMA4|TBL1XR1	1.01133	0.700287	1.46052	0.952101
PSMA4|WDR5	0.767502	0.527875	1.11591	0.165846
PURA|TUBB3	0.773265	0.544369	1.09841	0.151049
PURA|ADA	0.763345	0.523177	1.11376	0.161218
PURA|ARNT2	1.1862	0.794676	1.77063	0.403445
PURA|ARNTL2	0.741067	0.482577	1.13802	0.170928
PURA|CREM	1.02394	0.719276	1.45766	0.895528
PURA|EGR3	0.87158	0.61242	1.24041	0.445232
PURA|ID4	1.21253	0.86452	1.70064	0.264202
PURA|IL6	0.91538	0.661432	1.26683	0.593815
PURA|KMT2A	0.985792	0.70928	1.3701	0.932103
PURA|MAPK10	1.64779	1.17725	2.30641	0.00360167
PURA|OPN3	0.641215	0.462878	0.888263	0.00752789
PURA|PER3	0.906135	0.655511	1.25258	0.550722
PURA|PTGDS	0.72724	0.501666	1.05425	0.0927365
PURA|SIK1	0.994703	0.693281	1.42718	0.976996
PURA|SUV39H2	0.866007	0.57768	1.29824	0.486161
PURA|TH	1.1962	0.813368	1.75922	0.362658
PURA|CHD9	0.819514	0.596509	1.12589	0.219347
PURA|KLF15	1.34622	0.919337	1.97132	0.126569
PURA|NR3C1	1.09378	0.785527	1.52301	0.595597
PURA|SMARCD3	0.939984	0.683405	1.29289	0.703544
PURA|CHEK1	0.733858	0.487029	1.10578	0.139069
PURA|FBXL17	0.89103	0.636528	1.24729	0.501381
PURA|FBXL8	1.14555	0.833238	1.57493	0.402774
PURA|SRD5A1	0.922477	0.665838	1.27803	0.627593
QKI|RBPMS	1.85275	1.32849	2.58388	0.000279395
QKI|ADA	0.959697	0.694194	1.32675	0.803398
QKI|ARNTL2	0.863171	0.616574	1.20839	0.391329
QKI|CAVIN3	1.18746	0.821906	1.71559	0.360076
QKI|CIPC	1.24865	0.905919	1.72103	0.174965
QKI|CREM	1.13132	0.817652	1.56532	0.456406
QKI|EZH2	1.35503	0.951936	1.92882	0.0916931
QKI|ID4	1.35298	0.984042	1.86024	0.0627526
QKI|IL6	1.12089	0.770759	1.63008	0.550325
QKI|KMT2A	1.29824	0.85084	1.9809	0.226012
QKI|MAPK10	2.26197	1.4132	3.6205	0.000671183
QKI|NCOR1	0.835898	0.574762	1.21568	0.348254
QKI|PTGDS	0.845264	0.605607	1.17976	0.323056
QKI|RBM4B	1.14964	0.836309	1.58037	0.390376
QKI|SIRT1	1.5357	1.11719	2.111	0.00822735
QKI|SUV39H1	1.37075	0.996209	1.88611	0.0527898
QKI|SUV39H2	1.01114	0.731935	1.39684	0.946438
QKI|TH	1.13334	0.747392	1.7186	0.555682
QKI|CRTC3	1.26133	0.917972	1.73311	0.152132
QKI|HELZ2	1.23168	0.878409	1.72704	0.226949
QKI|NR3C1	0.85512	0.619998	1.17941	0.340044
QKI|SMARCD3	0.951955	0.677701	1.3372	0.776419
QKI|TBL1X	1.38701	1.00483	1.91455	0.0466736
QKI|CHEK1	0.862391	0.627867	1.18451	0.360582
QKI|FBXL17	1.15006	0.76744	1.72343	0.498134
QKI|FBXL8	1.32278	0.887181	1.97224	0.16988
QKI|SRD5A1	0.969939	0.69691	1.34993	0.856396
RBPMS|TAB2	0.755924	0.511692	1.11673	0.159891
RBPMS|ADA	0.764835	0.555043	1.05392	0.101234
RBPMS|ARNTL2	0.715862	0.520988	0.983629	0.0392291
RBPMS|CAVIN3	0.611537	0.437362	0.855074	0.00403517
RBPMS|CIPC	0.876905	0.618691	1.24289	0.460434
RBPMS|CREM	0.778265	0.539245	1.12323	0.180514
RBPMS|EZH2	0.881135	0.641526	1.21024	0.4345
RBPMS|FBXW11	0.758101	0.551612	1.04189	0.0878148
RBPMS|GFPT1	0.828167	0.581902	1.17865	0.295056
RBPMS|GNAQ	0.733897	0.516969	1.04185	0.0835191
RBPMS|ID2	1.38514	0.968235	1.98155	0.0745418
RBPMS|ID4	1.26841	0.891995	1.80367	0.185613
RBPMS|KLF10	0.758569	0.527154	1.09157	0.136723
RBPMS|METTL3	0.78591	0.571709	1.08036	0.137847
RBPMS|MYBBP1A	0.999911	0.682671	1.46457	0.999635
RBPMS|NAMPT	0.908253	0.637973	1.29304	0.593362
RBPMS|NCOR1	0.628543	0.456123	0.866139	0.00453393
RBPMS|NFIL3	0.676729	0.468748	0.976991	0.0371413
RBPMS|PML	0.750315	0.543472	1.03588	0.0808571
RBPMS|PRKDC	0.726784	0.498243	1.06016	0.0975796
RBPMS|PTGDS	0.845102	0.615403	1.16054	0.298353
RBPMS|RBM4B	0.663718	0.476157	0.92516	0.0155617
RBPMS|ROCK2	0.619562	0.450447	0.852169	0.00324483
RBPMS|SETX	0.709651	0.515878	0.976208	0.0350347
RBPMS|SIRT1	0.767454	0.5386	1.09355	0.142926
RBPMS|SUV39H1	0.773186	0.560816	1.06598	0.116414
RBPMS|SUV39H2	0.617854	0.442373	0.862944	0.00473243
RBPMS|TIMELESS	0.927329	0.662423	1.29817	0.66025
RBPMS|TYMS	0.816274	0.56365	1.18212	0.282626
RBPMS|CRTC3	0.757021	0.525956	1.0896	0.134097
RBPMS|HELZ2	0.738572	0.536648	1.01648	0.0629306
RBPMS|MEF2D	0.77657	0.56084	1.07528	0.127797
RBPMS|NR3C1	0.795686	0.561863	1.12682	0.19795
RBPMS|TBL1X	0.781166	0.561089	1.08756	0.143524
RBPMS|CHEK1	0.689111	0.489912	0.969303	0.0324298
RBPMS|WDR5	0.683552	0.456047	1.02455	0.0654008
RBPMS|CDK1	0.892359	0.620295	1.28375	0.539365
RBPMS|FBXL6	0.769407	0.539201	1.0979	0.148433
RBPMS|SRD5A1	0.707677	0.499615	1.00239	0.0515888
STBD1|TUBB3	0.868853	0.632546	1.19344	0.385375
STBD1|ARNT2	1.37912	0.989207	1.92272	0.0579653
STBD1|EGR3	0.850534	0.619398	1.16792	0.317028
STBD1|IL6	0.9276	0.675041	1.27465	0.643033
STBD1|MAPK10	1.22395	0.885461	1.69185	0.221147
STBD1|OPN3	0.873538	0.623997	1.22287	0.430857
STBD1|OPRL1	0.776905	0.559747	1.07831	0.131245
STBD1|PER3	1.0642	0.761547	1.48715	0.715506
STBD1|PPARA	1.08117	0.771063	1.516	0.650897
STBD1|SIK1	1.06841	0.773272	1.4762	0.6883
STBD1|SIX3	1.27332	0.86168	1.88159	0.225225
STBD1|TH	1.28738	0.909	1.82327	0.154841
STBD1|CHD9	1.03368	0.699984	1.52647	0.867713
STBD1|KLF15	1.26897	0.91941	1.75143	0.147368
STBD1|MEF2C	0.809271	0.58932	1.11132	0.190961
STBD1|NR3C1	0.959397	0.657726	1.39943	0.829613
STBD1|SMARCD3	0.830688	0.559974	1.23228	0.356565
STBD1|CSF2	1.63011	1.08737	2.44375	0.0180087
STBD1|FBXL8	1.23313	0.842007	1.80593	0.281693
TAB2|UGP2	0.933334	0.670601	1.299	0.682516
TAB2|ATF5	0.967928	0.672663	1.3928	0.860634
TAB2|CAVIN3	0.951595	0.685322	1.32133	0.767038
TAB2|GFPT1	0.864758	0.622844	1.20063	0.385465
TAB2|GNAQ	1.06984	0.751586	1.52285	0.707858
TAB2|ID2	1.71516	1.24559	2.36175	0.000948072
TAB2|ID4	1.35294	0.906548	2.01913	0.138955
TAB2|KLF10	0.832518	0.603694	1.14808	0.263632
TAB2|MYBBP1A	1.07428	0.780614	1.47843	0.66009
TAB2|NAMPT	0.941383	0.684963	1.2938	0.709658
TAB2|NFIL3	0.86035	0.626567	1.18136	0.352496
TAB2|OGT	1.38776	1.00545	1.91545	0.0462604
TAB2|PML	1.50601	1.02401	2.21488	0.0374757
TAB2|PRKDC	0.618112	0.444055	0.860394	0.00435716
TAB2|PTGDS	0.947144	0.665614	1.34775	0.762854
TAB2|SREBF1	0.796678	0.555039	1.14351	0.21769
TAB2|TIMELESS	1.02377	0.734732	1.4265	0.889634
TAB2|TYMS	0.923372	0.666678	1.2789	0.631433
TAB2|CRTC2	1.7892	1.2554	2.54998	0.00129012
TAB2|TBL1XR1	1.1689	0.841016	1.62462	0.352819
TAB2|WDR5	1.08413	0.783069	1.50095	0.626479
TAB2|CDK1	1.25826	0.91568	1.729	0.156564
TAB2|FBXL6	1.18491	0.850166	1.65146	0.31651
TOB1|AHCY	0.790755	0.568155	1.10057	0.163969
TOB1|ATF5	0.958708	0.654747	1.40378	0.828417
TOB1|BHLHE40	0.761231	0.526908	1.09976	0.146118
TOB1|CDK4	0.867498	0.620298	1.21321	0.4062
TOB1|EGR1	0.743837	0.541465	1.02185	0.0677646
TOB1|ID2	1.06303	0.709402	1.59294	0.767074
TOB1|JUN	0.681876	0.487345	0.954058	0.0254564
TOB1|JUND	0.881319	0.581067	1.33672	0.552221
TOB1|KLF10	0.879684	0.595605	1.29926	0.519404
TOB1|MAGED1	0.898565	0.651407	1.2395	0.514592
TOB1|NFIL3	0.921024	0.620675	1.36672	0.682874
TOB1|NR2F6	1.23449	0.890024	1.71227	0.20695
TOB1|PPP1CB	0.816012	0.585773	1.13675	0.229301
TOB1|SREBF1	0.71499	0.50099	1.0204	0.0645044
TOB1|TOP2A	0.834431	0.594886	1.17043	0.294445
TOB1|TYMS	0.837562	0.58203	1.20528	0.339818
TOB1|CRTC2	1.01384	0.676327	1.51978	0.946955
TOB1|WDR5	0.849422	0.584476	1.23447	0.392209
TUBB3|ARNT2	1.48423	1.07859	2.04244	0.0153332
TUBB3|EGR3	1.02246	0.743757	1.40561	0.891188
TUBB3|IL6	1.16069	0.843116	1.59788	0.360899
TUBB3|KCND2	1.04363	0.73818	1.47546	0.809017
TUBB3|KCNMA1	0.8739	0.607291	1.25755	0.467926
TUBB3|KMT2A	1.30561	0.914817	1.86334	0.141727
TUBB3|MAPK10	1.08317	0.783626	1.49721	0.628602
TUBB3|OPN3	1.00312	0.718458	1.40058	0.985386
TUBB3|OPRL1	0.992614	0.717948	1.37236	0.964224
TUBB3|PER3	1.23073	0.889235	1.70337	0.210566
TUBB3|PPARA	1.06768	0.772196	1.47625	0.691979
TUBB3|RORA	0.939491	0.659914	1.33751	0.729094
TUBB3|SIK1	1.01081	0.731773	1.39626	0.947967
TUBB3|SIX3	1.47738	0.995902	2.19162	0.0524334
TUBB3|TH	1.42995	1.01318	2.01815	0.0419056
TUBB3|USP2	0.891185	0.625388	1.26995	0.523793
TUBB3|CHD9	1.17471	0.834347	1.65394	0.356287
TUBB3|ELOVL3	1.15811	0.804556	1.66702	0.429629
TUBB3|KLF15	1.23863	0.900819	1.70313	0.187799
TUBB3|MEF2C	1.09668	0.798432	1.50634	0.568748
TUBB3|NR3C1	1.1826	0.813112	1.71999	0.38021
TUBB3|SMARCD3	1.11932	0.789846	1.58623	0.526278
TUBB3|CSF2	1.21409	0.859154	1.71566	0.271533
TUBB3|FBXL17	1.06531	0.735315	1.5434	0.738018
TUBB3|FBXL22	1.12682	0.814415	1.55905	0.47107
TUBB3|FBXL8	1.28628	0.913653	1.81087	0.149155
TUBB3|SRD5A1	1.33629	0.922134	1.93646	0.125605
UGP2|ATF5	1.24085	0.891683	1.72674	0.200557
UGP2|CAVIN3	0.971507	0.688596	1.37065	0.869255
UGP2|GFPT1	0.915094	0.64302	1.30229	0.622112
UGP2|GNAQ	0.791546	0.546481	1.14651	0.216207
UGP2|ID2	1.61547	1.16945	2.23161	0.00361987
UGP2|ID4	1.69253	1.06709	2.68455	0.02536
UGP2|KLF10	0.866869	0.631337	1.19027	0.377129
UGP2|MYBBP1A	1.03035	0.749181	1.41703	0.854115
UGP2|NAMPT	0.902031	0.653946	1.24423	0.52979
UGP2|NFIL3	0.829829	0.601674	1.1445	0.255472
UGP2|OGT	1.41528	1.01896	1.96574	0.0382649
UGP2|PRKDC	0.935676	0.681197	1.28522	0.681416
UGP2|PTGDS	0.916694	0.640907	1.31116	0.633827
UGP2|SREBF1	0.829858	0.59004	1.16715	0.283836
UGP2|TIMELESS	0.958533	0.679651	1.35185	0.809226
UGP2|TOP2A	1.13057	0.77471	1.64988	0.524561
UGP2|TYMS	1.00177	0.727186	1.38003	0.99137
UGP2|CRTC2	1.40125	0.993213	1.97693	0.0547086
UGP2|TBL1XR1	1.01434	0.736418	1.39715	0.930552
UGP2|WDR5	0.877123	0.637324	1.20715	0.421047
UGP2|CDK1	0.963547	0.701402	1.32367	0.818711
UGP2|FBXL6	1.01159	0.710626	1.44001	0.949008
ADA|ARNTL2	1.13222	0.823683	1.55633	0.444261
ADA|CAVIN3	1.04567	0.734158	1.48937	0.804527
ADA|CIPC	1.14027	0.829173	1.56809	0.419356
ADA|CREM	1.06567	0.769255	1.4763	0.702119
ADA|EZH2	1.16498	0.846053	1.60413	0.349453
ADA|FBXW11	0.959337	0.684944	1.34365	0.809165
ADA|GFPT1	1.18189	0.803463	1.73855	0.396059
ADA|GNAQ	1.08603	0.7588	1.55437	0.651897
ADA|ID2	1.20265	0.842706	1.71633	0.309214
ADA|ID4	1.2499	0.907965	1.7206	0.171346
ADA|IL6	0.986662	0.665121	1.46365	0.946794
ADA|KMT2A	1.12963	0.791358	1.61249	0.502056
ADA|MAPK10	2.12875	1.40454	3.22637	0.000369218
ADA|METTL3	1.00444	0.725642	1.39037	0.978673
ADA|NCOR1	1.07284	0.779593	1.47639	0.666041
ADA|PER3	0.957635	0.658852	1.39191	0.82052
ADA|PML	1.21569	0.84974	1.73924	0.285126
ADA|PTGDS	1.03591	0.752899	1.42529	0.828463
ADA|RBM4B	1.2157	0.883536	1.67273	0.230327
ADA|ROCK2	1.02107	0.739785	1.4093	0.89909
ADA|SETX	1.01924	0.739789	1.40424	0.90722
ADA|SIRT1	1.23101	0.893632	1.69577	0.203445
ADA|SUV39H1	1.21925	0.886794	1.67633	0.222333
ADA|SUV39H2	1.12637	0.814999	1.55669	0.471027
ADA|TH	1.27821	0.837664	1.95044	0.254948
ADA|CHD9	1.01704	0.697034	1.48396	0.930149
ADA|CRTC3	1.07964	0.784356	1.48609	0.638326
ADA|HELZ2	1.16441	0.846972	1.60082	0.348621
ADA|KLF15	1.55164	0.995222	2.41914	0.0525225
ADA|MEF2D	1.0042	0.701521	1.43746	0.981743
ADA|NR3C1	0.93909	0.665255	1.32564	0.720878
ADA|SMARCD3	1.0727	0.766247	1.50171	0.682654
ADA|TBL1X	1.13073	0.823009	1.55352	0.448392
ADA|CHEK1	0.886888	0.639759	1.22948	0.471345
ADA|FBXL17	1.22418	0.850756	1.76152	0.275963
ADA|FBXL6	0.94529	0.645397	1.38453	0.772612
ADA|FBXL8	1.4252	0.96921	2.09571	0.0717037
ADA|SRD5A1	0.906703	0.646056	1.27251	0.571141
AGRP|ATOH7	0.962157	0.699147	1.32411	0.812819
AGRP|CHRNB2	0.866758	0.602263	1.24741	0.441406
AGRP|DDC	0.767281	0.525865	1.11953	0.169368
AGRP|KCND2	0.933026	0.619238	1.40582	0.740317
AGRP|KCNMA1	0.536022	0.348946	0.823393	0.00441023
AGRP|MTNR1B	0.956088	0.673155	1.35794	0.801937
AGRP|MTTP	0.965057	0.677879	1.3739	0.843544
AGRP|NKX2-1	1.04213	0.7336	1.48041	0.817794
AGRP|NLGN1	0.718304	0.522496	0.987492	0.0416024
AGRP|NTRK3	0.727453	0.498371	1.06183	0.0991402
AGRP|OPN4	0.799653	0.540441	1.18319	0.26337
AGRP|PPARGC1A	0.762186	0.547391	1.06127	0.10786
AGRP|PRKAA2	0.901452	0.647726	1.25457	0.538431
AGRP|PROK1	0.833417	0.603402	1.15111	0.268774
AGRP|PROK2	0.800417	0.577281	1.1098	0.181825
AGRP|PROX1	0.975239	0.707569	1.34417	0.878271
AGRP|RORB	0.792109	0.569777	1.1012	0.165602
AGRP|SIK1	0.863825	0.600361	1.24291	0.430367
AGRP|SIX3	0.787665	0.563524	1.10096	0.162407
AGRP|TH	1.16115	0.824859	1.63454	0.391795
AGRP|ELOVL3	1.0155	0.687632	1.49971	0.938352
AGRP|CSF2	1.18305	0.831184	1.68387	0.350656
AGRP|HNF4A	0.855274	0.604405	1.21027	0.37747
AHCY|BHLHE40	1.07087	0.770228	1.48885	0.683846
AHCY|CLDN4	1.3695	0.962297	1.94901	0.0807237
AHCY|EGR1	0.911865	0.660162	1.25954	0.57559
AHCY|JUN	0.993653	0.723609	1.36447	0.96861
AHCY|JUND	1.47767	1.05869	2.06246	0.0217228
AHCY|MAGED1	1.00378	0.685377	1.4701	0.984541
AHCY|NR2F6	1.73825	1.13223	2.66864	0.0114795
AHCY|PPP1CB	1.31205	0.943822	1.82395	0.106104
ARNT2|EGR3	0.832695	0.603336	1.14925	0.265384
ARNT2|IL6	0.839849	0.607404	1.16125	0.291103
ARNT2|KCND2	0.716785	0.513626	1.0003	0.0502063
ARNT2|KCNMA1	0.590869	0.415147	0.840968	0.00348085
ARNT2|MAPK10	0.734958	0.513599	1.05172	0.0921496
ARNT2|OPN3	0.705566	0.49701	1.00164	0.0510791
ARNT2|OPRL1	0.540741	0.393386	0.743293	0.000152125
ARNT2|PER3	0.705975	0.488708	1.01983	0.0635507
ARNT2|PPARA	0.828393	0.582955	1.17717	0.293652
ARNT2|RORA	0.721971	0.50731	1.02746	0.0703765
ARNT2|SIK1	1.08123	0.782724	1.49356	0.635657
ARNT2|SIX3	0.987269	0.683894	1.42522	0.945465
ARNT2|TH	1.07769	0.773868	1.5008	0.6579
ARNT2|USP2	0.602787	0.429003	0.846968	0.00353252
ARNT2|CHD9	0.78499	0.526284	1.17087	0.235348
ARNT2|ELOVL3	0.878736	0.615939	1.25366	0.475825
ARNT2|KLF15	1.13163	0.823553	1.55496	0.445656
ARNT2|MEF2C	0.766775	0.553998	1.06128	0.1093
ARNT2|NR3C1	0.686249	0.452679	1.04033	0.0761145
ARNT2|CSF2	0.943966	0.675345	1.31943	0.735732
ARNT2|FBXL17	0.935078	0.632751	1.38186	0.736221
ARNT2|FBXL22	0.664007	0.482006	0.91473	0.0122355
ARNT2|FBXL8	1.0118	0.700235	1.46199	0.950199
ARNT2|SRD5A1	0.700606	0.44946	1.09209	0.116178
ARNTL2|CAVIN3	1.036	0.74014	1.45014	0.836673
ARNTL2|CIPC	1.12564	0.816815	1.55122	0.469487
ARNTL2|CREM	1.09254	0.771124	1.54793	0.618565
ARNTL2|EZH2	1.26266	0.917264	1.73813	0.152623
ARNTL2|FBXW11	1.06321	0.768984	1.47002	0.71077
ARNTL2|GFPT1	1.10747	0.761955	1.60967	0.592629
ARNTL2|GNAQ	1.19246	0.838084	1.69667	0.32795
ARNTL2|ID2	1.33568	0.940659	1.8966	0.105663
ARNTL2|ID4	1.15455	0.83986	1.58716	0.376094
ARNTL2|KMT2A	1.19139	0.819847	1.7313	0.358452
ARNTL2|MAPK10	1.66071	1.08157	2.54996	0.0204306
ARNTL2|METTL3	1.34774	0.981107	1.85139	0.0654428
ARNTL2|NCOR1	1.03993	0.757075	1.42845	0.808999
ARNTL2|OGT	1.30312	0.902639	1.88129	0.157594
ARNTL2|PML	1.31509	0.933972	1.85173	0.116708
ARNTL2|PTGDS	0.892979	0.64895	1.22877	0.487046
ARNTL2|RBM4B	1.20307	0.87399	1.65606	0.256835
ARNTL2|ROCK2	1.15078	0.838089	1.58012	0.385332
ARNTL2|SETX	1.19652	0.870849	1.64397	0.268361
ARNTL2|SIRT1	1.31019	0.940293	1.82561	0.110436
ARNTL2|SUV39H1	1.20448	0.873166	1.66151	0.256969
ARNTL2|SUV39H2	1.09392	0.78151	1.53122	0.60085
ARNTL2|CRTC3	1.07013	0.773782	1.47997	0.682022
ARNTL2|HELZ2	1.34741	0.980199	1.85219	0.0662441
ARNTL2|KLF15	1.31824	0.858636	2.02386	0.206526
ARNTL2|MEF2D	1.0118	0.714449	1.4329	0.947333
ARNTL2|NR3C1	1.03617	0.690769	1.55429	0.863626
ARNTL2|SMARCD3	1.22248	0.851887	1.75428	0.275677
ARNTL2|TBL1X	1.17558	0.855822	1.61482	0.317929
ARNTL2|CHEK1	1.23589	0.868439	1.75882	0.239421
ARNTL2|FBXL17	1.14386	0.770787	1.6975	0.504558
ARNTL2|FBXL6	1.15341	0.806356	1.64983	0.434527
ARNTL2|FBXL8	1.46509	0.966658	2.22054	0.07184
ARNTL2|SRD5A1	1.42999	0.959118	2.13202	0.0792371
ATF5|CAVIN3	0.748394	0.531446	1.0539	0.0970414
ATF5|CDK4	0.661538	0.438765	0.997418	0.048575
ATF5|EGR1	0.730596	0.498682	1.07036	0.107182
ATF5|GFPT1	0.91002	0.616155	1.34404	0.635578
ATF5|GNAQ	0.941909	0.637281	1.39215	0.764007
ATF5|ID2	1.44491	1.03192	2.02319	0.0321208
ATF5|KLF10	0.99524	0.717113	1.38124	0.977239
ATF5|MAGED1	0.870337	0.58929	1.28542	0.485185
ATF5|MYBBP1A	1.05567	0.757572	1.47106	0.748964
ATF5|NAMPT	0.817054	0.586311	1.13861	0.232742
ATF5|NFIL3	0.850925	0.60462	1.19757	0.354504
ATF5|OGT	1.38374	0.961714	1.99096	0.0801767
ATF5|PRKDC	0.878918	0.632951	1.22047	0.440996
ATF5|PTGDS	0.862566	0.593611	1.25338	0.438087
ATF5|SREBF1	0.777158	0.562635	1.07347	0.126078
ATF5|TOP2A	1.00279	0.722149	1.3925	0.986727
ATF5|TYMS	0.765241	0.555848	1.05351	0.100929
ATF5|CRTC2	1.2551	0.913395	1.72463	0.161128
ATF5|TBL1XR1	1.09391	0.792627	1.50971	0.585016
ATF5|WDR5	0.755553	0.546269	1.04502	0.0902886
ATF5|CDK1	1.10761	0.795242	1.54267	0.545436
ATOH7|CHRNB2	0.832504	0.584658	1.18541	0.309318
ATOH7|KCNMA1	0.601706	0.405518	0.892809	0.0116317
ATOH7|MTNR1B	0.952989	0.670678	1.35413	0.78821
ATOH7|MTTP	0.848521	0.598931	1.20212	0.355381
ATOH7|NKX2-1	1.13653	0.796584	1.62154	0.480333
ATOH7|NLGN1	0.728002	0.529452	1.00101	0.0507315
ATOH7|NTRK3	0.898627	0.601633	1.34223	0.601571
ATOH7|OPN4	0.798681	0.552462	1.15463	0.23194
ATOH7|PPARGC1A	0.726551	0.526486	1.00264	0.0519058
ATOH7|PRKAA2	0.801402	0.570376	1.126	0.201961
ATOH7|PROK1	0.847397	0.613022	1.17138	0.316154
ATOH7|PROK2	0.75853	0.546908	1.05204	0.0977204
ATOH7|PROX1	0.786197	0.566275	1.09153	0.150763
ATOH7|RORB	0.628305	0.453551	0.87039	0.00519401
ATOH7|SIK1	0.9103	0.636146	1.3026	0.607232
ATOH7|SIX3	0.802302	0.573987	1.12144	0.197334
ATOH7|TH	1.11118	0.78783	1.56726	0.54794
ATOH7|ELOVL3	0.826744	0.545293	1.25347	0.370236
ATOH7|CSF2	1.24905	0.887509	1.75788	0.20213
ATOH7|HNF4A	0.664654	0.480185	0.919988	0.0137878
BHLHE40|CLDN4	1.19845	0.860862	1.66841	0.283536
BHLHE40|EGR1	1.03712	0.732177	1.46906	0.83745
BHLHE40|JUN	0.9212	0.663366	1.27925	0.624179
BHLHE40|JUND	1.37068	0.997438	1.88359	0.0518781
BHLHE40|MAGED1	0.881827	0.606571	1.28199	0.510064
BHLHE40|NR2F6	1.34385	0.905483	1.99445	0.142351
BHLHE40|PPP1CA	1.289	0.938017	1.77132	0.117487
BHLHE40|PPP1CB	1.13849	0.801826	1.6165	0.468363
CAVIN3|CIPC	1.08553	0.756294	1.55811	0.656244
CAVIN3|EZH2	1.13098	0.812655	1.57398	0.465488
CAVIN3|FBXW11	1.1455	0.824912	1.59068	0.41741
CAVIN3|GFPT1	1.07585	0.781446	1.48115	0.654032
CAVIN3|GNAQ	1.23656	0.900233	1.69854	0.189849
CAVIN3|ID2	1.25191	0.910301	1.7217	0.167002
CAVIN3|ID4	1.52876	1.06832	2.18765	0.0202637
CAVIN3|KLF10	1.04415	0.747134	1.45924	0.80028
CAVIN3|METTL3	1.19844	0.858929	1.67216	0.2868
CAVIN3|MYBBP1A	1.13775	0.815635	1.58708	0.44729
CAVIN3|NAMPT	0.977323	0.705086	1.35467	0.890482
CAVIN3|NCOR1	0.97077	0.695095	1.35578	0.861819
CAVIN3|NFIL3	1.28056	0.920041	1.78234	0.142662
CAVIN3|OGT	1.41939	1.03225	1.95172	0.0311385
CAVIN3|PML	1.40013	1.01522	1.93096	0.040162
CAVIN3|PRKDC	1.0119	0.7239	1.41449	0.944796
CAVIN3|PTGDS	0.914469	0.660169	1.26673	0.590713
CAVIN3|RBM4B	1.23582	0.86592	1.76373	0.243332
CAVIN3|ROCK2	1.1022	0.782572	1.55239	0.577593
CAVIN3|SETX	1.07582	0.757442	1.52803	0.683104
CAVIN3|SIRT1	1.16682	0.815518	1.66944	0.398591
CAVIN3|SREBF1	1.00289	0.704305	1.42806	0.987222
CAVIN3|SUV39H1	1.16591	0.825022	1.64764	0.38435
CAVIN3|SUV39H2	1.16528	0.798912	1.69967	0.42705
CAVIN3|TIMELESS	1.11723	0.812672	1.53592	0.494842
CAVIN3|TOP2A	1.14494	0.785019	1.66989	0.482092
CAVIN3|TYMS	1.23966	0.889561	1.72756	0.204506
CAVIN3|CRTC2	1.27581	0.896108	1.8164	0.176573
CAVIN3|CRTC3	1.15716	0.793187	1.68815	0.448728
CAVIN3|HELZ2	1.27985	0.903635	1.8127	0.164715
CAVIN3|MEF2D	1.14979	0.836323	1.58074	0.390112
CAVIN3|TBL1X	1.0828	0.760105	1.54249	0.659481
CAVIN3|TBL1XR1	1.14688	0.822555	1.59907	0.419036
CAVIN3|CHEK1	1.04771	0.712319	1.54101	0.812853
CAVIN3|WDR5	1.13517	0.810363	1.59017	0.460974
CAVIN3|CDK1	1.09364	0.784831	1.52395	0.596981
CAVIN3|FBXL6	1.32836	0.966759	1.82521	0.0798705
CDK4|EGR1	0.682366	0.481523	0.96698	0.0316547
CDK4|ID2	1.93531	1.29139	2.90031	0.00137954
CDK4|JUN	0.70634	0.468629	1.06463	0.0967558
CDK4|MAGED1	0.937368	0.673329	1.30495	0.701592
CDK4|NR2F6	1.26812	0.918824	1.75022	0.148466
CDK4|OGT	1.92454	1.1896	3.11355	0.00764642
CDK4|SREBF1	0.881172	0.637835	1.21734	0.442957
CDK4|TOP2A	1.2217	0.888718	1.67945	0.217449
CDK4|TYMS	0.94131	0.647226	1.36902	0.751641
CDK4|CRTC2	1.63155	1.09433	2.43248	0.0162909
CDK4|TBL1XR1	1.30255	0.848037	2.00067	0.227363
CHRNB2|DDC	0.863716	0.618072	1.20699	0.390834
CHRNB2|KCNH7	0.868916	0.599802	1.25877	0.457477
CHRNB2|MTNR1B	1.06806	0.76683	1.48763	0.696907
CHRNB2|MTTP	0.97246	0.707977	1.33575	0.863094
CHRNB2|NKX2-1	1.35292	0.955131	1.91637	0.0888419
CHRNB2|NLGN1	1.00193	0.720818	1.39266	0.990863
CHRNB2|NTRK3	0.699313	0.506325	0.965859	0.029946
CHRNB2|OPN4	0.772601	0.562185	1.06177	0.111735
CHRNB2|PPARGC1A	0.755475	0.54645	1.04445	0.0897397
CHRNB2|PROK1	1.04143	0.757312	1.43215	0.802763
CHRNB2|PROK2	0.898569	0.649439	1.24327	0.518538
CHRNB2|RORB	0.827161	0.594224	1.15141	0.260809
CHRNB2|SIX3	1.06229	0.742631	1.51954	0.74077
CHRNB2|GHRHR	1.1694	0.791822	1.72702	0.431498
CHRNB2|HNF4A	0.954093	0.694653	1.31043	0.771636
CIPC|CREM	0.803155	0.579686	1.11277	0.187615
CIPC|EZH2	0.904532	0.635581	1.28729	0.577325
CIPC|ID4	1.37937	1.00191	1.89902	0.0486489
CIPC|IL6	0.888547	0.613595	1.2867	0.53162
CIPC|NCOR1	0.788994	0.560463	1.11071	0.174396
CIPC|PML	0.893885	0.602303	1.32663	0.577612
CIPC|PTGDS	0.855505	0.61854	1.18325	0.345624
CIPC|RBM4B	1.10917	0.807505	1.52352	0.522328
CIPC|ROCK2	0.921583	0.638214	1.33077	0.663114
CIPC|SETX	0.754537	0.537168	1.05986	0.104248
CIPC|SIRT1	0.986149	0.713854	1.36231	0.932579
CIPC|SUV39H1	1.04909	0.763044	1.44236	0.767972
CIPC|SUV39H2	0.729787	0.528737	1.00729	0.0553897
CIPC|CRTC3	0.906296	0.657661	1.24893	0.547605
CIPC|HELZ2	0.993852	0.719444	1.37292	0.970158
CIPC|NR3C1	0.979346	0.698411	1.37329	0.903695
CIPC|SMARCD3	0.915993	0.638608	1.31386	0.633523
CIPC|TBL1X	1.09541	0.797765	1.5041	0.573231
CIPC|CHEK1	0.93627	0.67516	1.29836	0.693024
CIPC|SRD5A1	0.824786	0.59006	1.15289	0.259594
CLDN4|EGR1	0.827269	0.574815	1.1906	0.307345
CLDN4|JUN	0.839898	0.588254	1.19919	0.336928
CLDN4|JUND	0.967297	0.687217	1.36153	0.848816
CLDN4|PPP1CA	0.8536	0.615945	1.18295	0.341711
CLDN4|UBC	0.969877	0.696688	1.35019	0.856206
CREM|ID4	1.41065	1.02695	1.93773	0.033659
CREM|IL6	0.922137	0.642355	1.32378	0.660349
CREM|KMT2A	1.00478	0.717517	1.40705	0.977861
CREM|MAPK10	1.69329	1.14144	2.51195	0.0088603
CREM|NCOR1	0.957972	0.658927	1.39274	0.822068
CREM|OPN3	0.623308	0.435515	0.892079	0.00975792
CREM|PER3	1.23214	0.837739	1.81222	0.288911
CREM|PTGDS	0.753563	0.535225	1.06097	0.105035
CREM|RBM4B	1.23614	0.882852	1.7308	0.217043
CREM|SIRT1	1.1425	0.827049	1.57826	0.419044
CREM|SUV39H1	1.21419	0.862312	1.70965	0.266341
CREM|SUV39H2	0.884173	0.636841	1.22756	0.462154
CREM|TH	1.14172	0.765637	1.70253	0.515637
CREM|CHD9	0.975368	0.679568	1.39992	0.892397
CREM|CRTC3	1.0998	0.794043	1.52328	0.567082
CREM|HELZ2	1.04283	0.734309	1.48099	0.814711
CREM|NR3C1	0.811077	0.589982	1.11503	0.197233
CREM|SMARCD3	0.987403	0.708511	1.37607	0.940326
CREM|TBL1X	1.17587	0.844824	1.63665	0.336866
CREM|CHEK1	0.907168	0.659457	1.24792	0.549323
CREM|FBXL17	1.02211	0.727571	1.43588	0.899665
CREM|FBXL8	1.7045	1.15433	2.51688	0.00732501
CREM|SRD5A1	0.898661	0.651807	1.23901	0.514351
DDC|KCNH7	0.874137	0.636325	1.20083	0.406356
DDC|MTNR1B	1.21923	0.887318	1.6753	0.221484
DDC|MTTP	1.03413	0.737531	1.44999	0.845723
DDC|NKX2-1	0.957442	0.695464	1.31811	0.789751
DDC|NLGN1	0.883462	0.59259	1.31711	0.543102
DDC|NTRK3	0.836116	0.605411	1.15474	0.277226
DDC|OPN4	0.76727	0.547872	1.07453	0.123156
DDC|PPARGC1A	0.758727	0.530327	1.08549	0.130781
DDC|PROK1	1.04402	0.738457	1.47601	0.80737
DDC|PROK2	0.842211	0.591922	1.19833	0.339879
DDC|RORB	0.734003	0.501328	1.07467	0.111889
DDC|SOX14	0.778922	0.566102	1.07175	0.124931
DDC|GHRHR	0.940269	0.684468	1.29167	0.703822
DDC|HNF4A	1.03323	0.730866	1.46067	0.853199
DDC|OPN5	0.856503	0.620771	1.18175	0.345611
EGR1|ID2	2.24563	1.42904	3.52884	0.00045139
EGR1|JUN	1.22133	0.886176	1.68323	0.221847
EGR1|JUND	1.1773	0.822709	1.68472	0.372035
EGR1|MAGED1	1.36314	0.981498	1.89318	0.064526
EGR1|MYBBP1A	2.02094	1.26229	3.23554	0.00338982
EGR1|NR2F6	1.38376	1.00084	1.9132	0.0494085
EGR1|PPP1CA	1.07097	0.744458	1.54068	0.711737
EGR1|PPP1CB	1.08655	0.788369	1.49751	0.612054
EGR1|SREBF1	1.24231	0.880689	1.75243	0.216407
EGR1|TOP2A	1.10535	0.788172	1.55017	0.561597
EGR1|TYMS	1.28423	0.852107	1.93549	0.231983
EGR1|CRTC2	1.82597	1.19704	2.78536	0.00519418
EGR1|TBL1XR1	1.77247	1.13699	2.76315	0.0115144
EGR1|WDR5	1.5476	0.992861	2.41229	0.0538142
EGR3|IL6	1.00751	0.733216	1.3844	0.963216
EGR3|KCND2	0.986951	0.695884	1.39976	0.941273
EGR3|KMT2A	0.992283	0.674889	1.45894	0.968578
EGR3|MAPK10	1.2178	0.885006	1.67575	0.226321
EGR3|OPN3	1.07073	0.771508	1.48601	0.682766
EGR3|OPRL1	0.719469	0.521315	0.992942	0.0451713
EGR3|PER3	1.46768	1.06368	2.02512	0.019502
EGR3|PPARA	1.12589	0.814955	1.55546	0.4721
EGR3|RORA	0.963755	0.651469	1.42574	0.853407
EGR3|SIK1	1.11993	0.803665	1.56065	0.503501
EGR3|SIX3	1.53158	1.03242	2.27208	0.0341317
EGR3|TH	1.47732	1.05318	2.07226	0.0238184
EGR3|USP2	0.952366	0.659404	1.37549	0.794701
EGR3|CHD9	0.973109	0.678277	1.3961	0.882326
EGR3|ELOVL3	1.24394	0.841922	1.83792	0.273078
EGR3|KLF15	1.32042	0.957418	1.82106	0.0901405
EGR3|MEF2C	1.26559	0.920732	1.73962	0.146738
EGR3|SMARCD3	1.34182	0.944809	1.90566	0.100431
EGR3|CSF2	1.56386	1.05408	2.32018	0.0263063
EGR3|FBXL17	1.09283	0.76392	1.56336	0.62702
EGR3|FBXL22	1.13818	0.808718	1.60186	0.45789
EGR3|FBXL8	1.10654	0.785582	1.55862	0.562452
EGR3|SRD5A1	1.06235	0.728296	1.54962	0.75353
EZH2|FBXW11	0.899683	0.653515	1.23858	0.516898
EZH2|GFPT1	0.967973	0.652461	1.43606	0.87151
EZH2|GNAQ	0.888813	0.613778	1.28709	0.532664
EZH2|ID2	1.10041	0.759839	1.59363	0.612576
EZH2|ID4	1.25472	0.905448	1.73871	0.172809
EZH2|IL6	1.01631	0.681311	1.51602	0.936808
EZH2|KLF10	1.14321	0.773897	1.68876	0.501362
EZH2|METTL3	0.913748	0.664869	1.25579	0.578208
EZH2|NAMPT	1.19575	0.835449	1.71143	0.328465
EZH2|NCOR1	0.815735	0.592813	1.12248	0.211109
EZH2|PML	0.900915	0.645552	1.25729	0.539489
EZH2|PTGDS	0.842677	0.613242	1.15795	0.291155
EZH2|RBM4B	0.95791	0.682705	1.34405	0.80348
EZH2|ROCK2	0.94737	0.688501	1.30357	0.739886
EZH2|SETX	0.865035	0.626092	1.19517	0.379386
EZH2|SIRT1	0.83897	0.580892	1.21171	0.349205
EZH2|SUV39H1	0.973561	0.694232	1.36528	0.876579
EZH2|CRTC3	0.918814	0.642299	1.31437	0.642995
EZH2|HELZ2	1.01282	0.73576	1.39421	0.937728
EZH2|MEF2D	0.842468	0.601853	1.17928	0.317808
EZH2|NR3C1	0.803705	0.556387	1.16096	0.244187
EZH2|TBL1X	1.02915	0.736215	1.43864	0.866485
EZH2|FBXL6	1.29097	0.919031	1.81344	0.140755
FBXW11|ID2	1.57208	1.10143	2.24384	0.0126961
FBXW11|ID4	1.4261	1.01857	1.99669	0.0387219
FBXW11|METTL3	1.06553	0.774047	1.46677	0.697098
FBXW11|NCOR1	0.847181	0.596018	1.20418	0.355303
FBXW11|PML	1.01957	0.732625	1.41891	0.90849
FBXW11|PTGDS	1.02012	0.741372	1.40368	0.90263
FBXW11|RBM4B	0.958676	0.648516	1.41717	0.832405
FBXW11|ROCK2	0.980008	0.696341	1.37923	0.907791
FBXW11|SETX	1.09199	0.763369	1.56207	0.629977
FBXW11|SUV39H1	1.26793	0.878323	1.83037	0.205039
FBXW11|TIMELESS	1.05288	0.712764	1.55529	0.795741
FBXW11|HELZ2	1.06202	0.762933	1.47836	0.721413
FBXW11|MEF2D	1.17102	0.833447	1.64531	0.362866
FBXW11|TBL1X	1.1633	0.808463	1.67388	0.41522
FBXW11|FBXL6	1.07206	0.745163	1.54237	0.707703
GFPT1|GNAQ	1.15759	0.837846	1.59937	0.374924
GFPT1|ID2	1.68641	1.22788	2.31618	0.00124664
GFPT1|ID4	1.55023	1.03922	2.3125	0.0316723
GFPT1|KLF10	0.959147	0.692381	1.32869	0.801934
GFPT1|METTL3	0.886587	0.590781	1.3305	0.5611
GFPT1|MYBBP1A	0.977424	0.699571	1.36564	0.89355
GFPT1|NAMPT	1.2063	0.878259	1.65686	0.246752
GFPT1|NFIL3	0.855342	0.620885	1.17833	0.339081
GFPT1|OGT	1.57238	1.14448	2.16026	0.00522728
GFPT1|PML	1.11798	0.79425	1.57367	0.522587
GFPT1|PRKDC	0.791509	0.565194	1.10845	0.17359
GFPT1|PTGDS	1.08468	0.765953	1.53603	0.647022
GFPT1|SREBF1	0.806842	0.534924	1.21699	0.306073
GFPT1|TIMELESS	0.933136	0.67867	1.28301	0.670123
GFPT1|TYMS	0.952845	0.678124	1.33886	0.780746
GFPT1|MEF2D	1.15768	0.813471	1.64754	0.416058
GFPT1|TBL1XR1	1.27265	0.887047	1.82587	0.190485
GFPT1|WDR5	0.993061	0.7081	1.3927	0.967813
GFPT1|CDK1	1.14055	0.826866	1.57323	0.422889
GFPT1|FBXL6	1.23777	0.897538	1.70697	0.193338
GNAQ|ID2	1.57468	1.14588	2.16392	0.00511643
GNAQ|ID4	1.72024	1.14083	2.59392	0.00963285
GNAQ|KLF10	0.805776	0.567549	1.144	0.227183
GNAQ|METTL3	1.14854	0.779911	1.69141	0.483129
GNAQ|MYBBP1A	0.976009	0.683503	1.39369	0.893715
GNAQ|NAMPT	1.14412	0.829966	1.57717	0.411061
GNAQ|NFIL3	0.917091	0.659814	1.27469	0.606406
GNAQ|OGT	1.4666	1.06429	2.02098	0.019242
GNAQ|PML	1.31946	0.949419	1.83374	0.0987653
GNAQ|PRKDC	0.775993	0.54233	1.11033	0.165312
GNAQ|PTGDS	0.922284	0.661936	1.28503	0.632606
GNAQ|SREBF1	0.825382	0.555188	1.22707	0.342851
GNAQ|TIMELESS	0.963651	0.699602	1.32736	0.820714
GNAQ|TYMS	0.842929	0.589191	1.20594	0.349718
GNAQ|HELZ2	1.37294	0.911045	2.06901	0.12984
GNAQ|MEF2D	1.14331	0.816445	1.60103	0.435658
GNAQ|TBL1XR1	1.23569	0.865213	1.7648	0.24451
GNAQ|WDR5	0.973411	0.666828	1.42095	0.888951
GNAQ|CDK1	0.891286	0.628972	1.263	0.517553
GNAQ|FBXL6	1.15658	0.842043	1.5886	0.369034
ID2|KLF10	0.62809	0.455439	0.866191	0.00456957
ID2|MAGED1	0.494004	0.314438	0.776116	0.00221652
ID2|MYBBP1A	0.694968	0.504934	0.95652	0.0255677
ID2|NAMPT	0.708359	0.515446	0.973474	0.0335279
ID2|NFIL3	0.730214	0.530493	1.00513	0.0537808
ID2|OGT	0.830442	0.604836	1.1402	0.250657
ID2|PML	0.795407	0.574766	1.10075	0.167312
ID2|PRKDC	0.602733	0.436857	0.831594	0.00204996
ID2|PTGDS	0.759525	0.544206	1.06004	0.10584
ID2|SETX	0.79103	0.542148	1.15416	0.22393
ID2|SREBF1	0.558119	0.39715	0.78433	0.000781482
ID2|TIMELESS	0.711292	0.517328	0.977979	0.035991
ID2|TOP2A	0.776518	0.550543	1.09525	0.14945
ID2|TYMS	0.618823	0.44621	0.858211	0.00402296
ID2|CRTC2	0.636827	0.452356	0.896525	0.00971267
ID2|HELZ2	0.981277	0.664526	1.44901	0.924284
ID2|MEF2D	0.646328	0.467082	0.894362	0.00844695
ID2|TBL1XR1	0.756415	0.54754	1.04497	0.0904253
ID2|WDR5	0.67391	0.488164	0.930331	0.0164436
ID2|CDK1	0.726303	0.527881	0.999309	0.0495057
ID2|FBXL6	0.69142	0.5024	0.951555	0.0235293
ID4|IL6	1.09911	0.770023	1.56883	0.602716
ID4|KLF10	0.661489	0.435737	1.0042	0.0523443
ID4|KMT2A	0.805297	0.581973	1.11432	0.191296
ID4|METTL3	0.64239	0.458007	0.901001	0.0103497
ID4|MYBBP1A	0.80293	0.535656	1.20357	0.287883
ID4|NAMPT	0.829005	0.563201	1.22026	0.341731
ID4|NCOR1	0.617594	0.445865	0.855468	0.00374317
ID4|NFIL3	0.618945	0.412866	0.927887	0.0202184
ID4|OGT	0.798102	0.526575	1.20964	0.287818
ID4|OPN3	0.729554	0.516009	1.03147	0.0743276
ID4|PER3	0.907916	0.634635	1.29887	0.596991
ID4|PML	0.627925	0.441181	0.893714	0.00976809
ID4|PPARA	0.732376	0.511775	1.04807	0.0885232
ID4|PRKDC	0.619221	0.408093	0.939576	0.0242635
ID4|PTGDS	0.782979	0.563145	1.08863	0.145685
ID4|RBM4B	0.756933	0.549054	1.04352	0.0891438
ID4|ROCK2	0.679767	0.489032	0.944892	0.0216002
ID4|SETX	0.726493	0.524921	1.00547	0.0539701
ID4|SIRT1	0.729761	0.531339	1.00228	0.0516686
ID4|SUV39H1	0.761288	0.551126	1.05159	0.0979738
ID4|SUV39H2	0.748979	0.545361	1.02862	0.074159
ID4|TIMELESS	0.723816	0.499747	1.04835	0.0872382
ID4|TYMS	0.660817	0.442896	0.985962	0.0424367
ID4|CHD9	0.76506	0.545555	1.07288	0.120612
ID4|CRTC3	0.683412	0.497131	0.939495	0.0190605
ID4|HELZ2	0.824291	0.596611	1.13886	0.241359
ID4|MEF2D	0.663943	0.459815	0.958692	0.0288871
ID4|NR3C1	0.741106	0.538445	1.02004	0.0660321
ID4|SMARCD3	0.705918	0.507075	0.982735	0.0390997
ID4|TBL1X	0.881533	0.641943	1.21054	0.435851
ID4|TBL1XR1	0.706718	0.453039	1.10244	0.126001
ID4|CHEK1	0.704596	0.513085	0.967591	0.0304991
ID4|WDR5	0.707223	0.474339	1.05444	0.0891642
ID4|CDK1	0.844092	0.577982	1.23272	0.380392
ID4|FBXL17	0.706942	0.509024	0.981814	0.0385007
ID4|FBXL6	0.587728	0.397963	0.867981	0.00754719
ID4|FBXL8	0.842088	0.598279	1.18525	0.324392
ID4|SRD5A1	0.767214	0.557708	1.05542	0.103423
IL6|KCND2	0.947438	0.67495	1.32993	0.754998
IL6|KCNMA1	0.779463	0.53599	1.13353	0.192241
IL6|KMT2A	1.02616	0.735285	1.4321	0.879311
IL6|MAPK10	1.09664	0.798096	1.50687	0.569358
IL6|NCOR1	1.02091	0.697071	1.4952	0.915344
IL6|OPN3	0.91909	0.666111	1.26815	0.607483
IL6|OPRL1	0.919438	0.665616	1.27005	0.610341
IL6|PER3	1.15306	0.838162	1.58625	0.381504
IL6|PPARA	0.991872	0.720841	1.36481	0.960032
IL6|PRKAA2	0.849084	0.589756	1.22244	0.378966
IL6|RBM4B	1.13524	0.791184	1.62892	0.491109
IL6|RORA	1.02806	0.721797	1.46427	0.878117
IL6|SIK1	0.968349	0.698339	1.34276	0.84708
IL6|SIRT1	1.01114	0.704414	1.45143	0.952092
IL6|SIX3	1.29772	0.892997	1.88586	0.171773
IL6|SUV39H1	1.03867	0.709115	1.52139	0.845516
IL6|SUV39H2	0.847385	0.57854	1.24116	0.395075
IL6|TH	1.3054	0.933642	1.82518	0.119127
IL6|USP2	1.02788	0.720189	1.46704	0.87956
IL6|CHD9	1.05882	0.766813	1.46201	0.728476
IL6|CRTC3	1.10148	0.767594	1.5806	0.599893
IL6|ELOVL3	1.01563	0.711925	1.4489	0.93181
IL6|HELZ2	1.07622	0.728498	1.5899	0.712186
IL6|KLF15	1.26038	0.910703	1.74432	0.162781
IL6|MEF2C	1.14199	0.830241	1.5708	0.414358
IL6|NR3C1	0.97983	0.694745	1.3819	0.907534
IL6|SMARCD3	1.08506	0.784155	1.50144	0.622256
IL6|TBL1X	1.16674	0.817795	1.66457	0.395017
IL6|CHEK1	1.00329	0.69709	1.44398	0.98591
IL6|CSF2	1.23391	0.851711	1.78762	0.266433
IL6|FBXL17	1.11213	0.803612	1.5391	0.521461
IL6|FBXL22	1.19724	0.847134	1.69204	0.307731
IL6|FBXL8	1.03168	0.744705	1.42924	0.851238
IL6|SRD5A1	1.19069	0.852026	1.66396	0.306723
JUN|JUND	1.21229	0.862051	1.70484	0.268442
JUN|MAGED1	1.14411	0.79985	1.63655	0.461034
JUN|NR2F6	1.49646	1.03351	2.16679	0.0328035
JUN|PPP1CA	1.26337	0.902428	1.76868	0.173233
JUN|PPP1CB	1.11123	0.806219	1.53163	0.519428
JUN|SREBF1	1.07036	0.717775	1.59614	0.738756
JUN|TOP2A	1.29533	0.887846	1.88982	0.179368
JUND|PPP1CA	1.07677	0.783931	1.47899	0.647866
JUND|PPP1CB	0.965281	0.656184	1.41998	0.857597
KCND2|KCNMA1	0.93148	0.672581	1.29004	0.669232
KCND2|OPRL1	0.879746	0.626147	1.23606	0.46023
KCND2|PRKAA2	0.923741	0.65505	1.30264	0.65104
KCND2|PROX1	0.910356	0.626345	1.32315	0.622524
KCND2|RORA	1.07682	0.783752	1.47947	0.647938
KCND2|SIK1	1.08344	0.788596	1.48853	0.620941
KCND2|SIX3	1.25141	0.897813	1.74426	0.185595
KCND2|TH	1.42093	1.03248	1.95553	0.0310736
KCND2|USP2	0.796302	0.579314	1.09457	0.160531
KCND2|ELOVL3	1.07062	0.77807	1.47318	0.675184
KCND2|KLF15	1.48536	1.06842	2.065	0.0185885
KCND2|MEF2C	1.16492	0.80431	1.6872	0.419264
KCND2|CSF2	1.18146	0.857237	1.6283	0.308299
KCND2|FBXL22	0.89592	0.648643	1.23746	0.504792
KCNH7|MTNR1B	1.13581	0.82154	1.57031	0.440974
KCNH7|MTTP	1.27231	0.876763	1.84631	0.20491
KCNH7|NKX2-1	1.06824	0.773614	1.47507	0.688464
KCNH7|NTRK3	0.953544	0.686794	1.3239	0.776319
KCNH7|OPN4	0.985265	0.704964	1.37701	0.930739
KCNH7|PPARGC1A	0.629276	0.409869	0.966134	0.0342204
KCNH7|PROK1	1.35145	0.941602	1.93968	0.102346
KCNH7|PROK2	0.954238	0.639178	1.42459	0.818787
KCNH7|SOX14	1.08037	0.780034	1.49634	0.641828
KCNH7|GHRHR	1.1334	0.825028	1.55703	0.4396
KCNH7|HNF4A	1.2684	0.900973	1.78568	0.173067
KCNH7|OPN5	1.13637	0.818076	1.57851	0.445808
KCNMA1|OPRL1	1.05407	0.72759	1.52706	0.780663
KCNMA1|PRKAA2	1.03617	0.746344	1.43854	0.831917
KCNMA1|PROK1	1.02275	0.688779	1.51866	0.911197
KCNMA1|PROX1	1.11453	0.786995	1.57838	0.54136
KCNMA1|RORA	1.01566	0.726808	1.41931	0.927478
KCNMA1|SIK1	1.14188	0.830112	1.57073	0.414787
KCNMA1|SIX3	1.12834	0.819538	1.5535	0.459227
KCNMA1|TH	1.46944	1.07004	2.01792	0.0173948
KCNMA1|USP2	0.806793	0.584189	1.11422	0.192452
KCNMA1|ELOVL3	1.15069	0.836962	1.58202	0.387481
KCNMA1|KLF15	1.29718	0.933258	1.80301	0.12143
KCNMA1|CSF2	1.53376	1.11596	2.10799	0.00838475
KCNMA1|FBXL22	1.04223	0.716977	1.51502	0.828443
KLF10|METTL3	1.34029	0.85976	2.08941	0.196033
KLF10|MYBBP1A	1.05341	0.766747	1.44726	0.74814
KLF10|NAMPT	0.935693	0.679303	1.28885	0.684133
KLF10|NFIL3	1.09195	0.793633	1.50239	0.589002
KLF10|NR2F6	1.51558	1.05906	2.16889	0.0229808
KLF10|OGT	1.36611	0.990994	1.88321	0.0568156
KLF10|PML	1.1103	0.751583	1.64023	0.599197
KLF10|PRKDC	0.903054	0.657496	1.24032	0.528823
KLF10|PTGDS	1.01955	0.718206	1.44732	0.913767
KLF10|SREBF1	0.74642	0.529678	1.05185	0.0946987
KLF10|TIMELESS	1.04215	0.747757	1.45244	0.807424
KLF10|TOP2A	1.08269	0.760914	1.54055	0.658831
KLF10|TYMS	1.12705	0.818971	1.55103	0.462856
KLF10|CRTC2	1.36595	0.987073	1.89025	0.059909
KLF10|MEF2D	1.01326	0.685891	1.49688	0.94724
KLF10|TBL1XR1	1.21985	0.887893	1.67592	0.2201
KLF10|WDR5	0.953495	0.693448	1.31106	0.769455
KLF10|CDK1	1.04924	0.763955	1.44107	0.766534
KLF10|FBXL6	0.879648	0.636262	1.21614	0.43779
KMT2A|MAPK10	1.74132	1.20995	2.50605	0.00282709
KMT2A|OPN3	0.692248	0.493468	0.971103	0.0331918
KMT2A|PER3	0.969032	0.689796	1.3613	0.856058
KMT2A|PTGDS	0.785749	0.550193	1.12215	0.184802
KMT2A|SUV39H2	0.962289	0.668526	1.38514	0.83613
KMT2A|TH	1.1227	0.760146	1.65818	0.560786
KMT2A|CHD9	0.929841	0.663223	1.30364	0.673075
KMT2A|KLF15	1.39366	0.929763	2.08901	0.107984
KMT2A|NR3C1	0.746352	0.53879	1.03387	0.0784746
KMT2A|SMARCD3	1.03103	0.750532	1.41635	0.850398
KMT2A|CHEK1	0.815884	0.559134	1.19053	0.29124
KMT2A|FBXL17	0.858712	0.62537	1.17912	0.346443
KMT2A|FBXL8	1.11544	0.80582	1.54403	0.510178
KMT2A|SRD5A1	0.807615	0.58671	1.11169	0.190017
MAGED1|NR2F6	1.23157	0.896412	1.69203	0.198721
MAGED1|PPP1CB	1.29037	0.912671	1.82438	0.149079
MAGED1|SREBF1	0.79496	0.5694	1.10987	0.177752
MAGED1|TOP2A	1.0668	0.770869	1.47634	0.696472
MAGED1|TYMS	1.04479	0.723583	1.50858	0.815163
MAGED1|CRTC2	1.56281	1.01795	2.3993	0.0412196
MAGED1|CDK1	0.970692	0.653869	1.44103	0.882692
MAPK10|OPN3	0.738261	0.537597	1.01383	0.0607767
MAPK10|OPRL1	0.742966	0.528446	1.04457	0.087428
MAPK10|PER3	0.780056	0.566347	1.07441	0.128361
MAPK10|PPARA	0.719042	0.523105	0.98837	0.0421501
MAPK10|PTGDS	0.640799	0.435768	0.9423	0.0236949
MAPK10|SIK1	1.07703	0.761864	1.52258	0.674388
MAPK10|SUV39H1	0.622722	0.396355	0.978372	0.0398964
MAPK10|SUV39H2	0.681052	0.463189	1.00139	0.0508295
MAPK10|TH	1.2269	0.857586	1.75525	0.263078
MAPK10|CHD9	0.651679	0.469471	0.904604	0.0104926
MAPK10|CRTC3	0.492912	0.301333	0.806294	0.00484031
MAPK10|KLF15	1.12967	0.80794	1.57952	0.475887
MAPK10|MEF2C	0.912791	0.65733	1.26753	0.585947
MAPK10|NR3C1	0.632223	0.447421	0.893356	0.00934308
MAPK10|SMARCD3	0.619695	0.439488	0.873792	0.00634309
MAPK10|CHEK1	0.653289	0.447943	0.952769	0.0270178
MAPK10|CSF2	1.2599	0.856605	1.85307	0.240527
MAPK10|FBXL17	0.667301	0.467735	0.952013	0.0256673
MAPK10|FBXL22	1.34246	0.889279	2.02659	0.161055
MAPK10|FBXL8	0.855965	0.620231	1.18129	0.344015
MAPK10|SRD5A1	0.610504	0.432056	0.862654	0.00514968
METTL3|NAMPT	1.09167	0.758269	1.57167	0.63712
METTL3|NCOR1	0.655354	0.473126	0.90777	0.0110202
METTL3|NFIL3	0.864877	0.575646	1.29943	0.484606
METTL3|PML	0.866816	0.624377	1.20339	0.39317
METTL3|PTGDS	0.867303	0.631155	1.19181	0.379988
METTL3|ROCK2	0.913696	0.662059	1.26097	0.582908
METTL3|SETX	0.903228	0.652991	1.24936	0.538613
METTL3|SUV39H1	1.23489	0.867317	1.75824	0.241868
METTL3|TIMELESS	0.966377	0.647829	1.44156	0.866886
METTL3|HELZ2	0.927779	0.673028	1.27896	0.647174
METTL3|MEF2D	0.990919	0.706579	1.38968	0.957836
METTL3|NR3C1	0.76139	0.53887	1.0758	0.122175
METTL3|TBL1X	1.10545	0.78226	1.56216	0.569912
METTL3|FBXL6	0.864875	0.579654	1.29044	0.477054
MTNR1B|MTTP	0.873898	0.622878	1.22608	0.43527
MTNR1B|NKX2-1	0.928516	0.666917	1.29273	0.660462
MTNR1B|NLGN1	0.84808	0.592668	1.21356	0.367441
MTNR1B|NTRK3	0.813556	0.587359	1.12686	0.214461
MTNR1B|OPN4	0.73753	0.52922	1.02783	0.0722016
MTNR1B|PPARGC1A	0.79651	0.562443	1.12799	0.199993
MTNR1B|PROK1	0.887133	0.623527	1.26218	0.505604
MTNR1B|PROK2	0.740144	0.512697	1.06849	0.108206
MTNR1B|PROX1	0.875713	0.581105	1.31968	0.525901
MTNR1B|RORB	0.788292	0.552555	1.1246	0.189446
MTNR1B|SIX3	0.694072	0.457612	1.05272	0.0857531
MTNR1B|SOX14	0.837067	0.60887	1.15079	0.273453
MTNR1B|GHRHR	0.868423	0.629644	1.19775	0.389797
MTNR1B|HNF4A	0.776111	0.54666	1.10187	0.156354
MTNR1B|OPN5	0.807361	0.587373	1.10974	0.187366
MTTP|NKX2-1	1.11427	0.799239	1.55348	0.523345
MTTP|NLGN1	0.862932	0.609417	1.22191	0.406154
MTTP|NTRK3	0.729592	0.528957	1.00633	0.0546667
MTTP|OPN4	0.831148	0.601398	1.14867	0.262565
MTTP|PPARGC1A	0.642887	0.463288	0.89211	0.00821858
MTTP|PROK1	1.02436	0.743631	1.41105	0.882928
MTTP|PROK2	0.84453	0.611901	1.1656	0.304015
MTTP|RORB	0.793646	0.571711	1.10174	0.167272
MTTP|SIX3	0.977469	0.68338	1.39812	0.900689
MTTP|GHRHR	0.884581	0.627156	1.24767	0.484599
MTTP|HNF4A	0.978395	0.711367	1.34566	0.893156
MYBBP1A|NAMPT	0.915559	0.665463	1.25965	0.587853
MYBBP1A|NFIL3	1.0434	0.759584	1.43326	0.793101
MYBBP1A|OGT	1.61868	1.16045	2.25786	0.00456329
MYBBP1A|PML	1.09233	0.739274	1.61399	0.657505
MYBBP1A|PRKDC	0.734334	0.532547	1.01258	0.0596056
MYBBP1A|PTGDS	0.957651	0.678753	1.35115	0.805389
MYBBP1A|SREBF1	0.816817	0.576569	1.15717	0.254892
MYBBP1A|TIMELESS	1.02246	0.725944	1.44008	0.898872
MYBBP1A|TOP2A	0.958898	0.659055	1.39516	0.826356
MYBBP1A|TYMS	1.12637	0.81654	1.55376	0.468424
MYBBP1A|CRTC2	1.49296	1.06448	2.09393	0.0202323
MYBBP1A|TBL1XR1	1.05323	0.76461	1.4508	0.750942
MYBBP1A|WDR5	0.87516	0.632406	1.2111	0.421112
MYBBP1A|CDK1	1.10017	0.799245	1.51441	0.558182
MYBBP1A|FBXL6	1.04982	0.739195	1.49098	0.785908
NAMPT|NFIL3	1.12237	0.816662	1.5425	0.476734
NAMPT|OGT	1.15801	0.842714	1.59127	0.365641
NAMPT|PML	1.20469	0.837161	1.73357	0.315945
NAMPT|PRKDC	1.0469	0.760829	1.44054	0.778359
NAMPT|PTGDS	0.950081	0.679294	1.32881	0.764821
NAMPT|SREBF1	1.00048	0.707869	1.41404	0.99784
NAMPT|TIMELESS	1.14909	0.830386	1.59011	0.40175
NAMPT|TOP2A	1.28956	0.903912	1.83973	0.160701
NAMPT|TYMS	1.22141	0.884141	1.68733	0.225097
NAMPT|CRTC2	1.42568	1.01461	2.00331	0.0410018
NAMPT|MEF2D	0.788433	0.563104	1.10393	0.166296
NAMPT|TBL1XR1	1.0934	0.786755	1.51957	0.594906
NAMPT|WDR5	1.18541	0.861225	1.63162	0.296744
NAMPT|CDK1	1.16235	0.845403	1.59813	0.354377
NAMPT|FBXL6	0.959433	0.697562	1.31961	0.798998
NCOR1|PML	1.0464	0.731111	1.49765	0.804198
NCOR1|PTGDS	1.03561	0.753495	1.42335	0.829271
NCOR1|RBM4B	1.46352	1.04146	2.05663	0.0282382
NCOR1|ROCK2	1.22606	0.890641	1.68781	0.211379
NCOR1|SETX	0.992242	0.722094	1.36346	0.96169
NCOR1|SIRT1	1.13807	0.782874	1.65442	0.498046
NCOR1|SUV39H1	1.28632	0.926426	1.78604	0.132685
NCOR1|SUV39H2	1.05566	0.728544	1.52965	0.774688
NCOR1|CRTC3	1.01928	0.715245	1.45255	0.915849
NCOR1|HELZ2	1.12159	0.816133	1.54136	0.479327
NCOR1|MEF2D	0.868735	0.57591	1.31045	0.502279
NCOR1|NR3C1	0.984435	0.686217	1.41225	0.932101
NCOR1|TBL1X	1.17125	0.8482	1.61733	0.33704
NCOR1|CHEK1	0.908645	0.639772	1.29051	0.592518
NCOR1|SRD5A1	1.14517	0.77813	1.68535	0.491733
NFIL3|OGT	1.36974	0.993828	1.88783	0.0545885
NFIL3|PML	1.19914	0.822129	1.74903	0.345699
NFIL3|PRKDC	1.03272	0.751228	1.4197	0.842801
NFIL3|PTGDS	0.933828	0.660838	1.31959	0.69797
NFIL3|SREBF1	0.880442	0.622666	1.24493	0.471266
NFIL3|TIMELESS	1.25425	0.903362	1.74143	0.176064
NFIL3|TOP2A	0.921706	0.62397	1.36151	0.682101
NFIL3|TYMS	1.08928	0.789235	1.50339	0.602929
NFIL3|CRTC2	1.19194	0.851357	1.66877	0.306463
NFIL3|MEF2D	1.10377	0.756672	1.61008	0.608281
NFIL3|TBL1XR1	1.07735	0.776872	1.49404	0.655187
NFIL3|WDR5	0.971523	0.698599	1.35107	0.863677
NFIL3|CDK1	1.08467	0.788945	1.49125	0.616773
NFIL3|FBXL6	0.992764	0.71928	1.37023	0.964769
NKX2-1|NLGN1	0.810706	0.55948	1.17474	0.26746
NKX2-1|NTRK3	0.933778	0.673466	1.29471	0.681128
NKX2-1|OPN4	0.868622	0.621289	1.21442	0.410068
NKX2-1|PPARGC1A	0.763039	0.531776	1.09488	0.142113
NKX2-1|PROK1	0.808051	0.569228	1.14707	0.233131
NKX2-1|PROK2	0.92502	0.652794	1.31077	0.661192
NKX2-1|RORB	0.929803	0.656447	1.31699	0.681978
NKX2-1|SOX14	0.878263	0.638481	1.2081	0.424917
NKX2-1|GHRHR	0.933608	0.67643	1.28856	0.676045
NKX2-1|HNF4A	0.784415	0.557221	1.10424	0.164028
NKX2-1|OPN5	0.956117	0.695958	1.31353	0.781826
NLGN1|NTRK3	0.896296	0.624581	1.28622	0.552441
NLGN1|OPN4	0.99014	0.698856	1.40283	0.955547
NLGN1|PPARGC1A	0.838789	0.6101	1.1532	0.279096
NLGN1|PROK1	1.09341	0.79461	1.50458	0.583464
NLGN1|PROK2	0.979999	0.712481	1.34796	0.901149
NLGN1|PROX1	1.16443	0.830454	1.63273	0.377388
NLGN1|RORB	1.0015	0.727609	1.37848	0.992684
NLGN1|SIK1	1.19218	0.835447	1.70123	0.332574
NLGN1|SIX3	1.03753	0.737229	1.46016	0.832619
NLGN1|TH	1.47064	1.04402	2.07157	0.0273555
NLGN1|CSF2	1.47627	1.04387	2.08778	0.0276126
NLGN1|GHRHR	1.2622	0.827348	1.9256	0.279919
NLGN1|HNF4A	1.1076	0.797313	1.53863	0.54229
NR2F6|PPP1CB	0.824244	0.572847	1.18597	0.297782
NR2F6|SREBF1	0.575316	0.413586	0.80029	0.00102743
NR2F6|TOP2A	0.720877	0.522609	0.994362	0.0461065
NR2F6|TYMS	0.852411	0.590547	1.23039	0.39379
NTRK3|OPN4	0.91345	0.665083	1.25456	0.576054
NTRK3|PPARGC1A	1.17918	0.840881	1.65358	0.339385
NTRK3|PROK1	1.26001	0.903912	1.75639	0.172623
NTRK3|PROK2	1.01269	0.724238	1.41603	0.94123
NTRK3|RORB	0.723067	0.485028	1.07793	0.111471
NTRK3|SIX3	0.985177	0.664031	1.46164	0.940853
NTRK3|GHRHR	1.1711	0.828637	1.65509	0.370838
NTRK3|HNF4A	1.56084	1.13518	2.14611	0.00613715
NTRK3|OPN5	1.19854	0.80705	1.77992	0.36943
OGT|PML	0.714826	0.507731	1.00639	0.0544211
OGT|PRKDC	0.524013	0.374154	0.733895	0.000169815
OGT|PTGDS	0.958702	0.684456	1.34283	0.806212
OGT|SREBF1	0.567129	0.391242	0.822086	0.0027515
OGT|TIMELESS	0.809266	0.588479	1.11289	0.192935
OGT|TOP2A	0.774087	0.523803	1.14396	0.198785
OGT|TYMS	0.832871	0.59746	1.16104	0.280592
OGT|CRTC2	0.835045	0.57241	1.21818	0.349465
OGT|MEF2D	0.456999	0.330454	0.632002	2.20209e-06
OGT|TBL1XR1	0.745645	0.531713	1.04565	0.0889023
OGT|WDR5	0.62076	0.442663	0.870511	0.0057137
OGT|CDK1	0.835842	0.603904	1.15686	0.279559
OGT|FBXL6	0.697483	0.504895	0.963532	0.0288667
OPN3|OPRL1	0.882696	0.613489	1.27003	0.501464
OPN3|PER3	0.971586	0.706807	1.33555	0.859062
OPN3|PPARA	1.11493	0.811226	1.53235	0.502511
OPN3|PTGDS	0.915187	0.633475	1.32218	0.636824
OPN3|SIK1	1.09117	0.771903	1.54248	0.621295
OPN3|TH	1.26779	0.886211	1.81367	0.19403
OPN3|CHD9	1.29709	0.936962	1.79563	0.11698
OPN3|KLF15	1.21365	0.873323	1.68661	0.248807
OPN3|MEF2C	0.895433	0.640677	1.25149	0.517887
OPN3|NR3C1	0.912413	0.636088	1.30878	0.618485
OPN3|SMARCD3	1.22841	0.886663	1.70186	0.216171
OPN3|CSF2	1.30122	0.853078	1.98478	0.221594
OPN3|FBXL17	1.23464	0.881725	1.72882	0.219769
OPN3|FBXL8	1.25099	0.909044	1.72156	0.169256
OPN3|SRD5A1	0.991906	0.684822	1.43669	0.965706
OPN4|PPARGC1A	0.701606	0.496311	0.991819	0.0448057
OPN4|PROK1	1.09885	0.775915	1.55618	0.595473
OPN4|PROK2	0.967336	0.676776	1.38264	0.855411
OPN4|RORB	1.09066	0.771414	1.54203	0.623315
OPN4|SIX3	1.04272	0.699079	1.55527	0.837535
OPN4|SOX14	1.13088	0.813685	1.57173	0.463962
OPN4|GHRHR	1.19718	0.86528	1.6564	0.277283
OPN4|HNF4A	1.33439	0.968049	1.83936	0.0781271
OPN4|OPN5	1.07688	0.769336	1.50735	0.665989
OPRL1|PER3	1.24855	0.861876	1.80871	0.240434
OPRL1|RORA	1.31795	0.921266	1.88544	0.130763
OPRL1|SIK1	1.16593	0.84503	1.60869	0.349929
OPRL1|SIX3	1.29412	0.901822	1.85707	0.16176
OPRL1|TH	1.60802	1.13779	2.27258	0.00711547
OPRL1|USP2	0.93149	0.657563	1.31953	0.689579
OPRL1|ELOVL3	1.2279	0.847611	1.7788	0.277628
OPRL1|KLF15	1.48789	1.0812	2.04756	0.014719
OPRL1|MEF2C	1.17875	0.840709	1.65272	0.340219
OPRL1|CSF2	1.36133	0.961139	1.92814	0.0824243
OPRL1|FBXL22	1.16737	0.834013	1.63397	0.36705
PER3|PPARA	0.970008	0.705178	1.33429	0.851521
PER3|PTGDS	0.657853	0.434066	0.997015	0.0483751
PER3|SIK1	1.03272	0.731848	1.45728	0.85462
PER3|SUV39H2	0.751043	0.503383	1.12055	0.160792
PER3|TH	1.17549	0.823802	1.67731	0.372724
PER3|CHD9	1.08686	0.786903	1.50115	0.613208
PER3|KLF15	1.44565	1.02888	2.03122	0.0336638
PER3|MEF2C	0.941252	0.672382	1.31764	0.724266
PER3|NR3C1	0.885603	0.626743	1.25138	0.491006
PER3|SMARCD3	1.07542	0.773661	1.49488	0.665208
PER3|CHEK1	0.760605	0.510134	1.13405	0.17937
PER3|CSF2	1.01019	0.686984	1.48546	0.958894
PER3|FBXL17	1.10362	0.783939	1.55366	0.572073
PER3|FBXL8	1.25689	0.913241	1.72986	0.160602
PER3|SRD5A1	1.03848	0.73648	1.46431	0.829493
PML|PRKDC	0.813657	0.548377	1.20727	0.30568
PML|PTGDS	0.838297	0.60957	1.15285	0.277921
PML|ROCK2	0.994536	0.700534	1.41192	0.975553
PML|SETX	0.773168	0.531774	1.12414	0.177925
PML|SUV39H1	1.10267	0.746537	1.62871	0.623337
PML|TIMELESS	0.814448	0.584495	1.13487	0.225312
PML|TYMS	0.83892	0.572859	1.22855	0.366836
PML|HELZ2	0.968038	0.674762	1.38878	0.859976
PML|MEF2D	0.810935	0.588465	1.11751	0.200231
PML|TBL1X	1.02867	0.70792	1.49475	0.882133
PML|CDK1	0.888939	0.617884	1.2789	0.525838
PML|FBXL6	0.952503	0.683516	1.32734	0.773796
PPARA|PTGDS	0.675919	0.450745	1.01358	0.0581303
PPARA|SIK1	0.886621	0.635348	1.23727	0.479091
PPARA|SIX3	1.39081	0.916871	2.10973	0.120728
PPARA|TH	1.03776	0.733929	1.46737	0.833901
PPARA|CHD9	1.01242	0.707756	1.44822	0.946138
PPARA|KLF15	1.43881	1.02573	2.01825	0.0351107
PPARA|MEF2C	0.775731	0.558118	1.07819	0.130592
PPARA|NR3C1	0.775139	0.519959	1.15556	0.211199
PPARA|SMARCD3	1.1215	0.799648	1.57289	0.50642
PPARA|CSF2	1.64183	1.07616	2.50482	0.021418
PPARA|FBXL8	1.57992	1.14374	2.18244	0.00552419
PPARA|SRD5A1	0.989973	0.680986	1.43916	0.957895
PPARGC1A|PRKAA2	1.05904	0.726047	1.54477	0.765828
PPARGC1A|PROK1	1.3267	0.965453	1.82311	0.0813043
PPARGC1A|PROK2	1.04896	0.763102	1.4419	0.768407
PPARGC1A|PROX1	1.47993	1.05302	2.07993	0.0239791
PPARGC1A|RORB	1.01392	0.736193	1.39642	0.932531
PPARGC1A|SIX3	0.953445	0.673243	1.35027	0.788301
PPARGC1A|TH	1.38267	0.977738	1.9553	0.0668584
PPARGC1A|GHRHR	0.941004	0.659422	1.34283	0.737496
PPARGC1A|HNF4A	1.17592	0.853343	1.62044	0.321903
PRKAA2|PROK1	0.970348	0.683521	1.37754	0.866295
PRKAA2|PROK2	1.12745	0.775419	1.63931	0.529911
PRKAA2|PROX1	1.11005	0.804207	1.5322	0.525502
PRKAA2|RORA	0.996963	0.694817	1.4305	0.986827
PRKAA2|RORB	1.04082	0.707813	1.5305	0.838844
PRKAA2|SIK1	1.16393	0.843687	1.60572	0.355155
PRKAA2|SIX3	1.30091	0.945939	1.78909	0.105639
PRKAA2|TH	1.64573	1.19834	2.26016	0.00208547
PRKAA2|USP2	0.931804	0.661886	1.31179	0.685657
PRKAA2|ELOVL3	1.01798	0.729962	1.41965	0.91635
PRKAA2|CSF2	1.35217	0.983468	1.8591	0.0632625
PRKAA2|FBXL22	1.07756	0.753118	1.54177	0.68277
PRKAA2|HNF4A	1.02111	0.688156	1.51515	0.917374
PRKDC|PTGDS	0.974855	0.69375	1.36986	0.883349
PRKDC|SREBF1	0.905181	0.649091	1.26231	0.557126
PRKDC|TIMELESS	1.26524	0.870443	1.83909	0.217633
PRKDC|TYMS	1.32702	0.965059	1.82473	0.0816658
PRKDC|CRTC2	1.6483	1.19555	2.27251	0.00228835
PRKDC|TBL1XR1	1.55018	1.12703	2.13221	0.00703524
PRKDC|WDR5	1.42089	1.03431	1.95194	0.0301434
PRKDC|CDK1	1.17702	0.856355	1.61776	0.315199
PRKDC|FBXL6	0.973172	0.688383	1.37578	0.877651
PROK1|PROK2	0.879427	0.640346	1.20777	0.427341
PROK1|PROX1	1.11199	0.794987	1.55541	0.535264
PROK1|RORB	0.952603	0.693338	1.30882	0.764502
PROK1|SIK1	1.00825	0.70056	1.45108	0.964718
PROK1|SIX3	1.04983	0.749598	1.47031	0.777215
PROK1|SOX14	0.820813	0.586313	1.1491	0.250012
PROK1|TH	1.21689	0.845602	1.75121	0.290528
PROK1|ELOVL3	1.04136	0.690357	1.57083	0.846773
PROK1|CSF2	1.29147	0.894813	1.86396	0.171847
PROK1|GHRHR	1.00198	0.718049	1.39817	0.990736
PROK1|HNF4A	0.921016	0.669988	1.2661	0.612322
PROK1|OPN5	0.806397	0.565192	1.15054	0.23537
PROK2|PROX1	1.33999	0.953872	1.88239	0.0914812
PROK2|RORB	0.989532	0.720204	1.35958	0.948239
PROK2|SIK1	1.27037	0.885548	1.82242	0.193677
PROK2|SIX3	1.14758	0.815313	1.61525	0.429966
PROK2|SOX14	1.16214	0.799265	1.68977	0.431411
PROK2|TH	1.37433	0.970387	1.94643	0.0733457
PROK2|GHRHR	1.22218	0.866244	1.72437	0.253291
PROK2|HNF4A	1.06065	0.769899	1.4612	0.718681
PROK2|OPN5	1.30227	0.872946	1.94274	0.195616
PROX1|RORB	0.74171	0.524868	1.04814	0.0903602
PROX1|SIK1	1.16003	0.833311	1.61485	0.379103
PROX1|SIX3	1.09782	0.797867	1.51053	0.566554
PROX1|TH	1.17615	0.848771	1.6298	0.329651
PROX1|USP2	0.737007	0.494083	1.09937	0.134746
PROX1|ELOVL3	0.801366	0.553312	1.16062	0.241299
PROX1|CSF2	1.07835	0.762558	1.52491	0.669626
PROX1|HNF4A	0.740639	0.511224	1.07301	0.112419
PTGDS|RBM4B	1.22017	0.880261	1.69133	0.232309
PTGDS|ROCK2	1.17515	0.854302	1.6165	0.321174
PTGDS|SETX	1.09606	0.795683	1.50983	0.574591
PTGDS|SIRT1	1.06669	0.769683	1.47831	0.698203
PTGDS|SREBF1	0.938519	0.639811	1.37668	0.745485
PTGDS|SUV39H1	1.16076	0.840841	1.60239	0.36484
PTGDS|SUV39H2	1.08329	0.781188	1.50223	0.631499
PTGDS|TH	1.60292	1.01971	2.51969	0.0408988
PTGDS|TIMELESS	0.988083	0.708492	1.37801	0.943683
PTGDS|TYMS	0.931963	0.64755	1.34129	0.704461
PTGDS|CHD9	1.26934	0.873084	1.84545	0.211619
PTGDS|CRTC3	1.11165	0.798366	1.54788	0.530862
PTGDS|HELZ2	1.23852	0.897088	1.70989	0.193608
PTGDS|KLF15	2.0626	1.24505	3.41698	0.00493938
PTGDS|MEF2D	0.995672	0.72033	1.37626	0.97905
PTGDS|NR3C1	1.16523	0.820815	1.65417	0.392317
PTGDS|SMARCD3	1.48805	1.01166	2.18877	0.0435054
PTGDS|TBL1X	1.15563	0.833921	1.60144	0.384887
PTGDS|TBL1XR1	0.991785	0.693232	1.41892	0.963995
PTGDS|CHEK1	1.006	0.724831	1.39624	0.971464
PTGDS|WDR5	0.994927	0.693039	1.42832	0.978005
PTGDS|CDK1	1.16067	0.819619	1.64364	0.401259
PTGDS|FBXL17	1.13791	0.802994	1.6125	0.467618
PTGDS|FBXL6	1.00003	0.716313	1.39612	0.999859
PTGDS|FBXL8	1.53771	1.04961	2.25278	0.0272126
PTGDS|SRD5A1	1.14288	0.815953	1.60079	0.437255
RBM4B|ROCK2	0.878385	0.623506	1.23745	0.458359
RBM4B|SETX	0.842252	0.605253	1.17205	0.308536
RBM4B|SIRT1	0.70298	0.511686	0.965788	0.0296468
RBM4B|SUV39H1	1.09046	0.793215	1.49908	0.593828
RBM4B|SUV39H2	0.823219	0.592974	1.14287	0.245165
RBM4B|CRTC3	0.864059	0.623378	1.19766	0.380404
RBM4B|HELZ2	0.973103	0.705586	1.34205	0.867971
RBM4B|NR3C1	0.816012	0.58975	1.12908	0.219745
RBM4B|SMARCD3	0.954306	0.660906	1.37796	0.802952
RBM4B|TBL1X	0.915405	0.666335	1.25758	0.585408
RBM4B|CHEK1	0.812346	0.585649	1.12679	0.21317
RBM4B|SRD5A1	0.88442	0.617955	1.26578	0.501926
ROCK2|SETX	1.1256	0.816134	1.55241	0.470721
ROCK2|SUV39H1	1.16936	0.845118	1.61801	0.345007
ROCK2|HELZ2	1.11929	0.813974	1.53914	0.488022
ROCK2|TBL1X	0.987627	0.714386	1.36538	0.939944
ROCK2|CHEK1	0.960457	0.655913	1.4064	0.835741
RORA|SIK1	1.0983	0.799064	1.50959	0.56343
RORA|SIX3	1.14507	0.821494	1.59611	0.423997
RORA|TH	1.40036	1.01585	1.93039	0.0397814
RORA|USP2	0.797208	0.579844	1.09605	0.162922
RORA|ELOVL3	1.14283	0.823964	1.58509	0.423783
RORA|KLF15	1.42266	1.02798	1.96887	0.0334694
RORA|CSF2	1.24913	0.902464	1.72895	0.179858
RORA|FBXL22	0.96586	0.697993	1.33652	0.833974
RORB|SIK1	1.48862	1.03951	2.13174	0.029895
RORB|SIX3	1.06481	0.755166	1.50142	0.7202
RORB|TH	1.42217	0.998808	2.02498	0.0507785
RORB|GHRHR	1.23142	0.830005	1.82698	0.301018
RORB|HNF4A	1.37739	0.992316	1.91189	0.0556382
SETX|SIRT1	1.18799	0.822938	1.71498	0.357765
SETX|SUV39H1	1.17356	0.848798	1.62257	0.332945
SETX|SUV39H2	1.05944	0.72034	1.55817	0.76925
SETX|CRTC3	0.966892	0.667709	1.40013	0.858538
SETX|HELZ2	1.21998	0.888157	1.67578	0.219577
SETX|TBL1X	1.13291	0.821913	1.56157	0.445974
SETX|CHEK1	1.04653	0.724782	1.5111	0.808295
SIK1|SIX3	1.24804	0.895628	1.73911	0.190591
SIK1|TH	1.06155	0.772238	1.45925	0.712935
SIK1|USP2	0.861512	0.626701	1.1843	0.358551
SIK1|CHD9	0.956854	0.660517	1.38614	0.815582
SIK1|ELOVL3	1.04521	0.75935	1.43867	0.786216
SIK1|KLF15	0.981903	0.711367	1.35533	0.91157
SIK1|MEF2C	0.935063	0.674788	1.29573	0.686653
SIK1|SMARCD3	0.741755	0.494688	1.11222	0.148352
SIK1|CSF2	1.15068	0.836789	1.58231	0.387814
SIK1|FBXL17	0.850833	0.57591	1.257	0.417207
SIK1|FBXL22	1.04793	0.76278	1.43968	0.772645
SIK1|FBXL8	0.984875	0.684212	1.41766	0.934641
SIK1|HNF4A	1.09155	0.728041	1.63655	0.671628
SIRT1|SUV39H1	0.958996	0.692953	1.32718	0.800615
SIRT1|SUV39H2	0.78583	0.57228	1.07907	0.136323
SIRT1|CRTC3	0.837433	0.608718	1.15208	0.275669
SIRT1|HELZ2	0.956551	0.683309	1.33906	0.795773
SIRT1|NR3C1	0.786612	0.569464	1.08656	0.145318
SIRT1|SMARCD3	0.835825	0.59579	1.17257	0.299138
SIRT1|TBL1X	1.04191	0.752286	1.44303	0.804863
SIRT1|CHEK1	0.86078	0.62663	1.18242	0.354706
SIRT1|FBXL8	0.991425	0.671233	1.46435	0.96548
SIRT1|SRD5A1	0.672564	0.486839	0.929142	0.0161418
SIX3|TH	1.25796	0.91182	1.7355	0.162195
SIX3|USP2	0.623468	0.44046	0.882516	0.00770095
SIX3|ELOVL3	0.832098	0.600449	1.15311	0.269529
SIX3|KLF15	1.0191	0.707916	1.46708	0.918921
SIX3|MEF2C	0.651165	0.440431	0.962729	0.0315269
SIX3|CSF2	1.09546	0.795025	1.50942	0.577223
SIX3|FBXL22	0.833954	0.595769	1.16736	0.289982
SIX3|HNF4A	1.06078	0.741429	1.51768	0.746793
SREBF1|TIMELESS	1.04737	0.705165	1.55566	0.818622
SREBF1|TOP2A	1.0188	0.73916	1.40424	0.909417
SREBF1|TYMS	1.03967	0.751999	1.43738	0.81391
SREBF1|CRTC2	1.38465	1.00354	1.91049	0.0475397
SREBF1|TBL1XR1	1.36666	0.972661	1.92025	0.0718272
SREBF1|WDR5	1.0318	0.745612	1.42783	0.850201
SREBF1|CDK1	1.30768	0.920688	1.85734	0.13403
SREBF1|FBXL6	1.41738	0.922703	2.17727	0.11124
SUV39H1|SUV39H2	0.855797	0.610916	1.19884	0.365215
SUV39H1|CRTC3	0.90503	0.654592	1.25128	0.546026
SUV39H1|HELZ2	1.18444	0.861476	1.62848	0.297396
SUV39H1|NR3C1	0.846626	0.606676	1.18148	0.327493
SUV39H1|SMARCD3	1.04249	0.734296	1.48002	0.815994
SUV39H1|TBL1X	0.891253	0.648309	1.22524	0.47833
SUV39H1|CHEK1	0.777556	0.556292	1.08683	0.140854
SUV39H1|SRD5A1	0.846911	0.588654	1.21847	0.370635
SUV39H2|CRTC3	0.965846	0.702974	1.32702	0.830237
SUV39H2|HELZ2	1.27713	0.909185	1.79397	0.15829
SUV39H2|NR3C1	0.815061	0.592829	1.1206	0.208049
SUV39H2|SMARCD3	0.990353	0.708539	1.38426	0.954752
SUV39H2|TBL1X	1.0748	0.773089	1.49427	0.66785
SUV39H2|CHEK1	0.93715	0.682352	1.28709	0.688448
SUV39H2|FBXL17	1.02876	0.726291	1.4572	0.873173
SUV39H2|FBXL8	1.43588	0.967446	2.13113	0.0725435
SUV39H2|SRD5A1	0.933187	0.667274	1.30507	0.686156
TH|USP2	0.675109	0.489511	0.931075	0.016603
TH|CHD9	0.996136	0.699742	1.41807	0.982856
TH|ELOVL3	0.69473	0.504297	0.957074	0.0258543
TH|KLF15	1.12542	0.815982	1.55221	0.471352
TH|MEF2C	0.645372	0.459357	0.906712	0.0115865
TH|NR3C1	0.849583	0.588225	1.22707	0.384821
TH|SMARCD3	0.828617	0.56316	1.2192	0.340031
TH|CHEK1	0.842978	0.562397	1.26354	0.408132
TH|CSF2	0.991746	0.721676	1.36288	0.959242
TH|FBXL17	0.905685	0.620757	1.32139	0.607256
TH|FBXL22	0.538483	0.387425	0.748438	0.000228724
TH|FBXL8	0.786336	0.53471	1.15637	0.221864
TH|SRD5A1	0.897664	0.615232	1.30975	0.575424
TIMELESS|TYMS	1.17765	0.817663	1.69612	0.379682
TIMELESS|HELZ2	1.09957	0.747559	1.61733	0.629715
TIMELESS|MEF2D	0.874062	0.624926	1.22252	0.431687
TIMELESS|TBL1XR1	1.39354	0.973962	1.99388	0.0694291
TIMELESS|WDR5	0.906518	0.628063	1.30843	0.600152
TIMELESS|CDK1	0.940733	0.660811	1.33923	0.734581
TIMELESS|FBXL6	1.03355	0.751681	1.42112	0.839044
TOP2A|TYMS	0.86954	0.607934	1.24372	0.443952
TOP2A|CRTC2	1.21014	0.855798	1.7112	0.280574
TOP2A|TBL1XR1	1.06161	0.744163	1.51448	0.741534
TOP2A|WDR5	1.00904	0.700857	1.45274	0.9614
TOP2A|FBXL6	0.975833	0.65735	1.44862	0.903401
TYMS|CRTC2	1.21611	0.884414	1.6722	0.228563
TYMS|MEF2D	1.21486	0.822566	1.79425	0.327959
TYMS|TBL1XR1	1.18519	0.862195	1.62919	0.29528
TYMS|WDR5	1.02385	0.745512	1.40612	0.884205
TYMS|CDK1	0.969995	0.702822	1.33873	0.852977
TYMS|FBXL6	1.01768	0.716596	1.44527	0.921989
USP2|ELOVL3	1.19058	0.863537	1.64148	0.287068
USP2|KLF15	1.49381	1.07602	2.07383	0.0164994
USP2|MEF2C	1.23069	0.849635	1.78265	0.272197
USP2|CSF2	1.45197	1.05274	2.0026	0.0230087
USP2|FBXL22	1.24592	0.905791	1.71377	0.176476
CHD9|KLF15	1.22342	0.852843	1.75502	0.273374
CHD9|NR3C1	0.72144	0.511596	1.01736	0.0626246
CHD9|SMARCD3	1.08158	0.785676	1.48893	0.630596
CHD9|CHEK1	0.86217	0.58377	1.27334	0.456027
CHD9|FBXL17	0.927033	0.66004	1.30203	0.661995
CHD9|FBXL8	1.22859	0.894514	1.68744	0.203558
CHD9|SRD5A1	0.848537	0.603638	1.19279	0.344509
CRTC2|TBL1XR1	0.941667	0.678319	1.30726	0.719509
CRTC2|WDR5	0.623743	0.450379	0.86384	0.00449861
CRTC2|CDK1	0.697643	0.503485	0.966675	0.030492
CRTC3|HELZ2	1.19464	0.859333	1.66077	0.290034
CRTC3|NR3C1	0.835337	0.602961	1.15727	0.279358
CRTC3|SMARCD3	0.808434	0.573104	1.1404	0.225699
CRTC3|TBL1X	1.21533	0.878246	1.6818	0.239339
CRTC3|CHEK1	0.948805	0.690601	1.30355	0.745737
CRTC3|SRD5A1	0.77522	0.557687	1.07761	0.129729
ELOVL3|KLF15	1.19939	0.855155	1.6822	0.29216
ELOVL3|CSF2	1.22158	0.889267	1.67807	0.216644
ELOVL3|FBXL22	1.12488	0.814184	1.55414	0.475524
HELZ2|MEF2D	0.866926	0.600692	1.25116	0.445526
HELZ2|NR3C1	0.744272	0.521576	1.06205	0.103505
HELZ2|SMARCD3	0.969779	0.678743	1.38561	0.866145
HELZ2|TBL1X	1.02963	0.749259	1.41491	0.857127
HELZ2|CHEK1	0.784665	0.55858	1.10226	0.161968
HELZ2|FBXL6	1.02151	0.700131	1.4904	0.912089
HELZ2|SRD5A1	0.902368	0.618705	1.31609	0.593665
KLF15|MEF2C	0.77427	0.561448	1.06777	0.118731
KLF15|NR3C1	0.690284	0.474868	1.00342	0.0521278
KLF15|SMARCD3	0.57843	0.376538	0.888572	0.0124429
KLF15|CSF2	1.06934	0.762621	1.49941	0.697501
KLF15|FBXL17	0.829665	0.564281	1.21986	0.342386
KLF15|FBXL22	0.619588	0.450396	0.852337	0.00326263
KLF15|FBXL8	0.711039	0.492493	1.02656	0.0687525
KLF15|SRD5A1	0.620299	0.420021	0.916074	0.0163676
MEF2C|CSF2	1.3311	0.912605	1.94151	0.137519
MEF2C|FBXL8	1.05545	0.722943	1.54089	0.779829
MEF2D|CDK1	0.878259	0.594738	1.29694	0.513961
MEF2D|FBXL6	1.21982	0.88383	1.68355	0.226758
NR3C1|SMARCD3	1.06202	0.773028	1.45906	0.710381
NR3C1|TBL1X	1.11705	0.79352	1.5725	0.525798
NR3C1|CHEK1	0.994197	0.723237	1.36667	0.971406
NR3C1|FBXL17	1.13575	0.817275	1.57833	0.448357
NR3C1|FBXL8	1.41103	1.00456	1.98197	0.0470095
NR3C1|SRD5A1	1.13258	0.823107	1.55842	0.444544
SMARCD3|TBL1X	1.02926	0.726567	1.45807	0.871049
SMARCD3|CHEK1	0.808287	0.580065	1.1263	0.208632
SMARCD3|FBXL17	1.01734	0.740849	1.39703	0.915378
SMARCD3|FBXL8	1.03822	0.754431	1.42877	0.817897
SMARCD3|SRD5A1	0.909406	0.661646	1.24994	0.558419
TBL1X|CHEK1	0.85348	0.618964	1.17685	0.333774
TBL1X|FBXL8	1.00029	0.685558	1.45951	0.998803
TBL1X|SRD5A1	1.03748	0.733765	1.4669	0.835071
TBL1XR1|WDR5	0.885157	0.644317	1.21602	0.451518
TBL1XR1|CDK1	1.04246	0.75723	1.43513	0.798759
TBL1XR1|FBXL6	0.996157	0.692286	1.43341	0.983455
CHEK1|FBXL17	1.09266	0.771582	1.54735	0.617644
CHEK1|FBXL8	1.535	1.04839	2.24749	0.0276042
CHEK1|SRD5A1	1.00988	0.725642	1.40547	0.953493
WDR5|CDK1	1.03171	0.749724	1.41976	0.848022
WDR5|FBXL6	1.33865	0.914115	1.96034	0.133986
CSF2|FBXL22	0.785607	0.565188	1.09199	0.150945
GHRHR|OPN5	0.868378	0.626933	1.20281	0.395859
CDK1|FBXL6	0.872001	0.627277	1.2122	0.415104
FBXL17|FBXL8	1.06169	0.767034	1.46953	0.718174
FBXL17|SRD5A1	0.824248	0.597479	1.13708	0.239035
FBXL8|SRD5A1	0.835999	0.603242	1.15856	0.281962
