# Supplementary material for: A circadian rhythm-related gene signature associated with tumor immunity, cisplatin efficacy, and prognosis in bladder cancer
Source: Aging (Albany NY). 2021 Dec 3;13(23):25153–79. doi: 10.18632/aging.203733 (PMC8714136; doi:10.18632/aging.203733)
Supplement: Supplementary Table 8 [file aging-13-203733-s008.xls]

## Sheet: risk_GSE32894
Supplementary Table 8. The evaluated CRRS and risk stratification of the patients from GSE32894.
id	CRRS	risk
UC_0546_1	0.0757161	low
UC_0040_1	0.103632	low
UC_0775_1	0.103632	low
UC_0394_1	0.103632	low
UC_0776_1	0.103632	low
UC_0780_1	0.103632	low
UC_0770_1	0.103632	low
UC_0238_1	0.103632	low
UC_0753_1	0.103632	low
UC_0211_2	0.103632	low
UC_0006_2	0.103632	low
UC_0537_1	0.103632	low
UC_0719_1	0.103632	low
UC_0335_1	0.103632	low
UC_0723_1	0.103632	low
UC_0429_1a	0.103632	low
UC_0712_1	0.103632	low
UC_0703_1	0.103632	low
UC_0706_1	0.103632	low
UC_0598_1	0.103632	low
UC_0692_1	0.103632	low
UC_0557_1	0.103632	low
UC_0101_1	0.103632	low
UC_0415_1	0.103632	low
UC_0624_1	0.103632	low
UC_0783_1	0.103632	low
UC_0620_1	0.103632	low
UC_0606_1	0.103632	low
UC_0593_1	0.103632	low
UC_0209_1	0.103632	low
UC_0301_1	0.103632	low
UC_0573_1	0.103632	low
UC_0248_2	0.103632	low
UC_0530_1	0.103632	low
UC_0554_1	0.103632	low
UC_0495_1	0.103632	low
UC_0208_1	0.103632	low
UC_0525_1	0.103632	low
UC_0468_1	0.103632	low
UC_0162_1	0.103632	low
UC_0491_1	0.103632	low
UC_0354_2c	0.103632	low
UC_0438_1	0.103632	low
UC_0372_1	0.103632	low
UC_0218_2	0.103632	low
UC_0414_1	0.103632	low
UC_0042_2a	0.103632	low
UC_0342_1	0.103632	low
UC_0398_1	0.103632	low
UC_0009_1	0.103632	low
UC_0395_1a	0.103632	low
UC_0025_1	0.103632	low
UC_0067_1	0.103632	low
UC_0279_1	0.103632	low
UC_0312_1	0.103632	low
UC_0274_1	0.103632	low
UC_0257_1	0.103632	low
UC_0114_1	0.103632	low
UC_0210_2	0.103632	low
UC_0106_2	0.103632	low
UC_0033_2	0.103632	low
UC_0302_1	0.103632	low
UC_0290_1	0.103632	low
UC_0185_1	0.103632	low
UC_0075_1	0.103632	low
UC_0145_1	0.103632	low
UC_0170_1	0.103632	low
UC_0112_1	0.103632	low
UC_0384_1	0.117251	low
UC_0456_2	0.14217	low
UC_0016_1	0.14217	low
UC_0214_1	0.14217	low
UC_0339_1	0.14217	low
UC_0600_1	0.14217	low
UC_0766_1	0.14217	low
UC_0778_1	0.14217	low
UC_0601_1	0.14217	low
UC_0200_1	0.14217	low
UC_0750_1	0.14217	low
UC_0475_1	0.14217	low
UC_0713_1	0.14217	low
UC_0619_1	0.14217	low
UC_0782_1	0.14217	low
UC_0321_1	0.14217	low
UC_0697_1	0.14217	low
UC_0700_1	0.14217	low
UC_0397_1	0.14217	low
UC_0696_1	0.14217	low
UC_0574_1	0.14217	low
UC_0093_1	0.14217	low
UC_0628_1	0.14217	low
UC_0613_1	0.14217	low
UC_0612_1	0.14217	low
UC_0592_1	0.14217	low
UC_0545_1	0.14217	low
UC_0328_1	0.14217	low
UC_0610_1	0.14217	low
UC_0583_1	0.14217	low
UC_0159_1	0.14217	low
UC_0120_1	0.14217	low
UC_0494_1	0.14217	low
UC_0513_1b	0.14217	low
UC_0138_1	0.14217	low
UC_0283_1	0.14217	low
UC_0519_1	0.14217	low
UC_0349_3	0.14217	low
UC_0368_1	0.14217	low
UC_0445_1	0.14217	low
UC_0284_1	0.14217	low
UC_0329_1	0.14217	low
UC_0207_1	0.14217	low
UC_0122_1	0.14217	low
UC_0176_2	0.14217	low
UC_0203_1	0.14217	low
UC_0069_1	0.14217	low
UC_0080_1	0.14217	low
UC_0049_2	0.14217	low
UC_0008_1	0.14217	low
UC_0580_1	0.144102	low
UC_0344_1	0.147107	low
UC_0760_1	0.181173	low
UC_0007_1	0.181173	low
UC_0576_1	0.181173	low
UC_0493_1	0.181173	low
UC_0224_1	0.197689	low
UC_0567_1	0.197689	low
UC_0779_1	0.197689	low
UC_0701_1	0.197689	low
UC_0034_1	0.197689	low
UC_0607_1	0.197689	low
UC_0322_2	0.197689	low
UC_0595_1	0.197689	low
UC_0447_1	0.197689	low
UC_0533_1	0.197689	low
UC_0561_1a	0.197689	low
UC_0287_1	0.197689	low
UC_0018_1	0.201812	low
UC_0046_1	0.201812	low
UC_0152_1	0.201812	low
UC_0375_1	0.201812	low
UC_0558_1	0.201812	low
UC_0230_1	0.201812	low
UC_0614_1	0.206194	low
UC_0752_1	0.206194	low
UC_0745_1	0.206194	low
UC_0715_1	0.206194	low
UC_0386_1	0.206194	low
UC_0327_1	0.206194	low
UC_0726_1	0.206194	low
UC_0743_1	0.206194	low
UC_0720_1	0.206194	low
UC_0710_1	0.206194	low
UC_0487_1	0.206194	low
UC_0584_1	0.206194	low
UC_0622_1	0.206194	low
UC_0625_1	0.206194	low
UC_0343_1	0.206194	low
UC_0575_1	0.206194	low
UC_0616_1	0.206194	low
UC_0089_1	0.206194	low
UC_0542_2	0.206194	low
UC_0544_1	0.206194	low
UC_0240_1	0.206194	low
UC_0578_1	0.206194	low
UC_0536_1	0.206194	low
UC_0295_2c	0.206194	low
UC_0565_1	0.206194	low
UC_0115_1	0.206194	low
UC_0548_1	0.206194	low
UC_0267_3	0.206194	low
UC_0215_1	0.206194	low
UC_0374_2a	0.206194	low
UC_0369_1	0.206194	low
UC_0010_1	0.206194	low
UC_0506_1	0.206194	low
UC_0393_1	0.206194	low
UC_0421_1	0.206194	low
UC_0405_1	0.206194	low
UC_0367_1	0.206194	low
UC_0037_1	0.206194	low
UC_0070_1	0.206194	low
UC_0100_1	0.206194	low
UC_0024_1	0.206194	low
UC_0001_1	0.206194	low
UC_0195_1	0.220159	low
UC_0521_1	0.248545	low
UC_0765_1	0.248545	low
UC_0781_1	0.248545	low
UC_0125_1	0.248545	low
UC_0588_1	0.257177	low
UC_0611_1	0.28287	low
UC_0499_1	0.28287	low
UC_0336_2	0.28287	low
UC_0721_1	0.28287	low
UC_0724_1	0.28287	low
UC_0605_1	0.28287	low
UC_0043_1	0.28287	low
UC_0591_1	0.28287	low
UC_0066_3	0.28287	low
UC_0095_1	0.28287	low
UC_0461_1	0.28287	low
UC_0555_1	0.28287	low
UC_0528_1	0.28287	low
UC_0132_2	0.28287	low
UC_0299_1	0.28287	low
UC_0023_1	0.28287	low
UC_0086_1	0.28287	low
UC_0260_1	0.28287	low
UC_0166_1	0.28287	low
UC_0376_1	0.286715	low
UC_0577_1	0.292694	low
UC_0361_1	0.292694	low
UC_0017_1	0.319304	high
UC_0615_1	0.360473	high
UC_0718_1	0.360473	high
UC_0626_1	0.360473	high
UC_0539_1	0.393334	high
UC_0516_1	0.49059	high
UC_0563_1	0.494521	high
UC_0707_1	0.558216	high
UC_0030_1	0.609411	high
