# Supplementary material for: A circadian rhythm-related gene signature associated with tumor immunity, cisplatin efficacy, and prognosis in bladder cancer
Source: Aging (Albany NY). 2021 Dec 3;13(23):25153–79. doi: 10.18632/aging.203733 (PMC8714136; doi:10.18632/aging.203733)
Supplement: Supplementary Table 11 [file aging-13-203733-s010.xls]

## Sheet: ssgseaOut
Supplementary Table 11. The GSVA scores of the 7 gene clusters representing different immune and inflammatory responses.
id	TCGA-FD-A6TF-01A	TCGA-XF-AAMR-01A	TCGA-XF-A8HF-01A	TCGA-ZF-AA4U-01A	TCGA-ZF-AA54-01A	TCGA-GU-A766-01A	TCGA-XF-AAML-01A	TCGA-ZF-AA58-01A	TCGA-G2-AA3B-01A	TCGA-K4-A54R-01A	TCGA-DK-A1AA-01A	TCGA-CU-A5W6-01A	TCGA-DK-AA6R-01A	TCGA-BT-A3PH-01A	TCGA-DK-A3IQ-01A	TCGA-E7-A4XJ-01A	TCGA-XF-A9T6-01A	TCGA-ZF-AA5H-01A	TCGA-DK-A3WX-01A	TCGA-YF-AA3L-01A	TCGA-BT-A2LA-01A	TCGA-4Z-AA87-01A	TCGA-BT-A2LB-01A	TCGA-XF-A8HB-01A	TCGA-DK-A2I6-01A	TCGA-ZF-AA4X-01A	TCGA-BT-A20P-01A	TCGA-CF-A3MF-01A	TCGA-CF-A47T-01A	TCGA-YC-A8S6-01A	TCGA-DK-A3IS-01A	TCGA-XF-A9SJ-01A	TCGA-DK-AA6T-01A	TCGA-E7-A5KE-01A	TCGA-ZF-AA4V-01A	TCGA-ZF-AA53-01A	TCGA-ZF-A9RM-01A	TCGA-CU-A72E-01A	TCGA-FD-A62O-01A	TCGA-BL-A3JM-01A	TCGA-FJ-A3ZF-01A	TCGA-CU-A0YO-01A	TCGA-CF-A5UA-01A	TCGA-K4-AAQO-01A	TCGA-ZF-A9R7-01A	TCGA-FD-A3SO-01A	TCGA-E7-A97P-01A	TCGA-GU-A767-01A	TCGA-4Z-AA81-01A
IgG	0.202784	0.0888672	0.197519	0.0792295	0.123937	0.200777	0.242489	0.322177	0.280405	0.101066	0.164789	0.23871	0.102581	0.150988	0.0696274	0.120636	0.146271	0.230912	0.221921	0.104057	0.0338935	0.280497	0.22889	0.151061	0.15644	0.168471	0.17872	0.257979	0.164353	0.126021	0.0238334	0.211806	0.643333	0.160277	0.185261	0.230224	0.128606	0.182019	0.140364	0.133755	0.0164525	0.165551	0.227386	0.19091	0.297865	0.246012	0.201028	0.116121	0.17765
HCK	0.637115	0.647414	0.622207	0.418048	0.846153	0.815938	0.49378	0.868243	0.475828	0.692922	0.484918	0.523529	0.510834	0.464427	0.638316	0.390925	0.626298	0.713623	0.677172	0.523015	0.370627	0.64435	0.644166	0.505416	0.516476	0.333132	0.419481	0.408964	0.341331	0.668481	0.437877	0.716346	0.741274	0.299461	0.61927	0.803652	0.263849	0.609584	0.415261	0.583297	0.313612	0.594516	0.495774	0.635523	0.682315	0.71823	0.689789	0.488688	0.572255
MHC-II	0.772906	0.854288	0.802028	0.770966	0.93595	0.936336	0.905489	0.941865	0.828946	0.859125	0.745109	0.784588	0.714	0.681233	0.78705	0.62714	0.79698	0.866679	0.826141	0.767339	0.560502	0.80098	0.816427	0.770493	0.696542	0.825366	0.722277	0.634964	0.511764	0.866105	0.818771	0.88514	0.97026	0.584177	0.868441	0.898956	0.574869	0.750381	0.645929	0.747641	0.557445	0.876969	0.701553	0.851021	0.932467	0.877323	0.907715	0.721534	0.890496
LCK	0.481272	0.487311	0.4812	0.352958	0.648181	0.742378	0.44093	0.731944	0.469367	0.609437	0.447881	0.430241	0.43865	0.396722	0.426405	0.419249	0.482901	0.63513	0.624236	0.411112	0.261757	0.543575	0.558488	0.369207	0.40832	0.347563	0.342298	0.414543	0.396969	0.614888	0.374777	0.602206	0.773714	0.340272	0.540576	0.612106	0.324058	0.438099	0.410235	0.41665	0.326632	0.565826	0.405584	0.570931	0.693336	0.527994	0.647873	0.419192	0.550648
MHC-I	0.824361	0.86159	0.869142	0.904455	0.913313	0.964714	0.91811	0.951789	0.925134	0.888526	0.833639	0.832577	0.8316	0.765793	0.841753	0.808889	0.890115	0.954258	0.87304	0.849096	0.853495	0.861194	0.905827	0.860598	0.870821	0.842745	0.898059	0.825549	0.821242	0.90035	0.966936	0.940387	0.901942	0.744483	0.902856	0.944734	0.824356	0.800688	0.779545	0.877468	0.795153	0.934998	0.865333	0.872041	0.949193	0.903405	0.967323	0.879575	0.93802
STAT1	0.673799	0.56935	0.625964	0.69374	0.851803	0.994568	0.791881	0.990395	0.842872	0.921247	0.644936	0.69494	0.923755	0.492019	0.522025	0.480092	0.763644	0.966133	0.921213	0.498379	0.550268	0.730145	0.871408	0.571271	0.77788	0.631389	0.609326	0.454591	0.452304	0.666737	0.770502	0.885764	0.744678	0.485015	0.841951	0.917798	0.556589	0.577469	0.536817	0.77887	0.536352	0.851568	0.531047	0.755125	0.952412	0.874066	0.989181	0.631551	0.923536
Interferon	0.6419	0.722935	0.648767	0.682569	0.864459	0.97526	0.71638	0.966011	0.792551	0.833826	0.722343	0.859592	0.947379	0.485152	0.575884	0.532857	0.896212	0.935428	0.703952	0.556486	0.556723	0.433348	0.915221	0.730523	0.573266	0.795871	0.751234	0.535516	0.549625	0.589272	0.688185	0.769838	0.528878	0.394411	0.745746	0.880951	0.66473	0.652651	0.562223	0.737657	0.477723	0.753827	0.652206	0.658898	0.861135	0.771519	0.908536	0.817819	0.841255
[truncated: 206 more columns]
