# Supplementary material for: A circadian rhythm-related gene signature associated with tumor immunity, cisplatin efficacy, and prognosis in bladder cancer
Source: Aging (Albany NY). 2021 Dec 3;13(23):25153–79. doi: 10.18632/aging.203733 (PMC8714136; doi:10.18632/aging.203733)
Supplement: Supplementary Table 12 [file aging-13-203733-s011.xls]

## Sheet: riskTest
Supplementary Table 12. The calculated CRRS of IMvigor210 cohort.
id	CRRS	risk
SAM4918c524b83a	0.408353	low
SAM18039827e1b9	0.408353	low
SAMd86389d0d768	0.408353	low
SAM17c45bf16bb6	0.408353	low
SAMf82bbdc267c8	0.408353	low
SAMba7176afe070	0.408353	low
SAM63b2189c36d7	0.408353	low
SAMbcbc7957c264	0.408353	low
SAM5a2347c0498a	0.408353	low
SAM1ac4e3dee297	0.408353	low
SAM6792d6e98068	0.408353	low
SAMf28c01545593	0.408353	low
SAM9539a4f19ebc	0.408353	low
SAMc57eadb2d82b	0.408353	low
SAM7c67b05aa109	0.408353	low
SAM2c9586161ce6	0.408353	low
SAM8533e5e261d6	0.408353	low
SAMe3d4266775a9	0.408353	low
SAM4caabd64e7fd	0.408353	low
SAM58e7832f4e7d	0.408353	low
SAM27299aed7681	0.408353	low
SAM065890737112	0.408353	low
SAMb470eb8f04be	0.408353	low
SAMb8070b7937e7	0.408353	low
SAM08cce2fa88f2	0.408353	low
SAMb0a83e5fbde9	0.408353	low
SAM54e58f1b0230	0.529498	low
SAMdab9ca8fb5de	0.543605	low
SAMaf7578d55754	0.543605	low
SAM8e43e9caf307	0.543605	low
SAM99b1f6a9534e	0.543605	low
SAMabc151b01ea3	0.543605	low
SAMbf91f27e7f9b	0.543605	low
SAM85e41e7f33f9	0.543605	low
SAM5fc9ae0aed1f	0.543605	low
SAM3f2033c90438	0.543605	low
SAMc97f35a29d16	0.543605	low
SAMbd8ee73983b8	0.543605	low
SAMd0e47be700b0	0.543605	low
SAM4edbe45817b3	0.543605	low
SAM5ffd7e4cd794	0.543605	low
SAM3779e979db6b	0.543605	low
SAM9d2494119c05	0.543605	low
SAMf2ce197162ce	0.543605	low
SAMcee0fa8c05b4	0.543605	low
SAM7fb7a13c096b	0.543605	low
SAM7ee2b6e4d6b3	0.543605	low
SAMa1871f491b02	0.543605	low
SAM73b653ae20d1	0.543605	low
SAM7a9093b9c7e9	0.543605	low
SAM2de7cffb5f72	0.543605	low
SAM2dc578e0165f	0.543605	low
SAMd98bac0a070f	0.543605	low
SAM4b0175e8db6e	0.543605	low
SAMe07c4560772d	0.543605	low
SAM81b71522417a	0.543605	low
SAMaff272833538	0.543605	low
SAM563d6233dfa2	0.543605	low
SAMe3210d3632b4	0.543605	low
SAM23095936e611	0.543605	low
SAM957378bd907f	0.543605	low
SAM187e056d6a2a	0.543605	low
SAMdad5c29dc105	0.543605	low
SAM032c642382a7	0.543605	low
SAMcb132b0cdd2c	0.543605	low
SAM29da928587ad	0.543605	low
SAMaabf4afe4213	0.543605	low
SAM7893196e0e89	0.543605	low
SAMb8f13a0525a6	0.543605	low
SAMbe83eae4026e	0.543605	low
SAM87a8e18eb45b	0.543605	low
SAM8a42c0d59187	0.543605	low
SAM0d855cff64e6	0.543605	low
SAM9b9d48b0b02c	0.543605	low
SAMcc4675f394a1	0.543605	low
SAMe7bf6c015192	0.543605	low
SAMeb29625f76a5	0.543605	low
SAMb4c7a001537d	0.543605	low
SAMee3844cc0b9f	0.543605	low
SAMae02629a97f7	0.543605	low
SAM1f83ebd6be9b	0.543605	low
SAM36851bc8b9ae	0.543605	low
SAMa424c75831b4	0.543605	low
SAM99a46b9eec27	0.543605	low
SAM5b57e47fdcb3	0.543605	low
SAMb15ad09d6e24	0.543605	low
SAMdee1011782cd	0.543605	low
SAMf20b827dca51	0.543605	low
SAM8e8ef2368dfa	0.543605	low
SAMae4da274eded	0.543605	low
SAM3cb94b0d5297	0.543605	low
SAMd4c0837b0997	0.543605	low
SAM26104d5adc89	0.543605	low
SAMe9ae8beb82fa	0.543605	low
SAM9a2cf3c06fb3	0.543605	low
SAM5cc2d9036053	0.543605	low
SAM85f0a3ac1c45	0.543605	low
SAMe5bc41772bc9	0.543605	low
SAM09c84ec0cf34	0.543605	low
SAM557dde1b9f3e	0.543605	low
SAM553c3c35b847	0.543605	low
SAMbfdffb97c446	0.543605	low
SAM5e3bae090b8c	0.543605	low
SAM3e8baff50d7a	0.543605	low
SAM3785587846ce	0.543605	low
SAM5c139c5c1c4f	0.543605	low
SAM12502d970c10	0.543605	low
SAM49f9b2e57aa5	0.543605	low
SAMe7bcab05402e	0.543605	low
SAM52e3fa3ad574	0.543605	low
SAM2070b416069c	0.543605	low
SAM31f41dd0d6ca	0.543605	low
SAM9aa6a095a9d6	0.543605	low
SAM9725303dce0c	0.543605	low
SAM18be5b395318	0.543605	low
SAM28e6031ac18b	0.543605	low
SAMc0da5d48686d	0.543605	low
SAMc0ef41aa6c8b	0.543605	low
SAMf2aae1443f67	0.543605	low
SAM2bba8cb35e48	0.543605	low
SAM7114d99032ec	0.543605	low
SAM181b638b8248	0.543605	low
SAM5d1dfd5207f5	0.543605	low
SAMe97af0feefdf	0.543605	low
SAM75142fcab9df	0.543605	low
SAM1e9c4d1d39ae	0.543605	low
SAMba1a34b5a060	0.543605	low
SAM07a93a28f801	0.543605	low
SAM4b7ea015fd9e	0.543605	low
SAM94859b440b1d	0.543605	low
SAM76a431ba6ce1	0.543605	low
SAMda4d892fddc8	0.543605	low
SAMbc8dc3a7b54e	0.543605	low
SAM80c6183220e6	0.543605	low
SAMad83c9c53537	0.543605	low
SAM2b672f4336c7	0.543605	low
SAMe94c30c30616	0.543605	low
SAM9306c5c92444	0.543605	low
SAM0257bbbbd388	0.543605	low
SAM3b1066e5801b	0.543605	low
SAM8b4b8b0f9e73	0.543605	low
SAM3a1c9632ff7b	0.543605	low
SAMcf018fee2acd	0.543605	low
SAM6964a6d7b967	0.543605	low
SAM9daccafc18db	0.543605	low
SAM6157c8f38b72	0.543605	low
SAM1abf01dd4544	0.543605	low
SAM91c47b054ffb	0.543605	low
SAM5fe7a81a39dd	0.543605	low
SAM31d9176e11fb	0.543605	low
SAMcc7a42d87e9c	0.543605	low
SAM3e04eb914f3d	0.543605	low
SAM822b226466a1	0.543605	low
SAMa535fcdf18a0	0.543605	low
SAM548551ef782c	0.543605	low
SAM7edacb3deb65	0.543605	low
SAMd5ab7fbfab4e	0.543605	low
SAM6ff654a20f98	0.543605	low
SAMe50d15fde368	0.543605	low
SAM6f2a102a99df	0.543605	low
SAM6662f5181f87	0.543605	low
SAMb15ac6e4c4ef	0.543605	low
SAM4581bac493af	0.543605	low
SAMaaf505c36f93	0.543605	low
SAM8a1b0e02ee42	0.543605	low
SAMfed609955db9	0.543605	low
SAMbda79f955628	0.543605	low
SAMeb587a68006b	0.543605	low
SAM25510f300d79	0.543605	low
SAM8f2275c36e8c	0.543605	low
SAMc919aebc7fdd	0.543605	low
SAMd3bd67996035	0.543605	low
SAMe1eb5d988760	0.543605	low
SAMae1690469964	0.543605	low
SAMd697ba701077	0.543605	low
SAM716f54e468f4	0.543605	low
SAM73663ee4a96e	0.543605	low
SAM075e037d95bc	0.543605	low
SAM560f23d6a3ad	0.543605	low
SAM61b9d4d84c64	0.543605	low
SAM14df63a65411	0.543605	low
SAM3b15b4c6311d	0.543605	low
SAM28687037e4ff	0.543605	low
SAMeaa477a5384b	0.543605	low
SAMc1251c7bfee2	0.543605	low
SAM7b40007f4aa4	0.543605	low
SAM670649e105b5	0.543605	low
SAM6d2ae0c39b96	0.543605	low
SAMe712352fb82a	0.543605	low
SAM2570ff4aae6e	0.543605	low
SAM62fb1388c871	0.543605	low
SAM1fa6bcb7fc48	0.543605	low
SAMd3601288319e	0.543605	low
SAM6cb230f208a8	0.543605	low
SAM0684af734db1	0.543605	low
SAM681e4bf7cf85	0.543605	low
SAMc1b27bc16435	0.543605	low
SAMf275eb859a39	0.543605	low
SAM1bcc62d8290c	0.59492	low
SAM95c70496ffb5	0.704874	low
SAMa0ca029b7afd	0.704874	low
SAM714285adf612	0.704874	low
SAM3f446449bf81	0.704874	low
SAM9eebdef2858a	0.704874	low
SAM4501e41e4751	0.704874	low
SAM31291c256373	0.704874	low
SAM0a0f2bac4b20	0.704874	low
SAM1f3c93814cb9	0.704874	low
SAMd215b503f99a	0.704874	low
SAM491e341d5a82	0.704874	low
SAMfddc359e862b	0.704874	low
SAM9448d858692c	0.704874	low
SAMf3a9bce50099	0.704874	low
SAM978a587b207e	0.704874	low
SAM3894ac3956a5	0.704874	low
SAM1ab1b28d9f2b	0.704874	low
SAM0bdb3428bd13	0.704874	low
SAMff41c4e8c08f	0.704874	low
SAM2624229effe8	0.704874	low
SAM0a7c2091dd56	0.704874	low
SAM7746b76437e6	0.704874	low
SAM675a12a09c15	0.704874	low
SAM5d989c86255e	0.704874	low
SAM45c8e6412c66	0.704874	low
SAMd135d5867fe3	0.704874	low
SAM8e469834acc1	0.704874	low
SAM59fda9035d1d	0.704874	low
SAMe0c49ea0df5d	0.704874	low
SAMb2e4a082541a	0.704874	low
SAM0571f17f4045	0.704874	low
SAM9681450bbc90	0.704874	low
SAM166a419a4e5a	0.704874	low
SAM1a87df750b9d	0.704874	low
SAMaf42c1541269	0.704874	low
SAMc692536a795a	0.704874	low
SAM23aa15d4a0b0	0.704874	low
SAM1c0ecfb3eb63	0.704874	low
SAM961d04c42bd9	0.704874	low
SAM6780ed436b55	0.704874	low
SAMce39dd79b441	0.704874	low
SAM0ce9c983b20f	0.704874	low
SAM63405b04ab2d	0.704874	low
SAMdf3e42c8672a	0.704874	low
SAM9cafb905b36a	0.704874	low
SAMd2492b2a31bb	0.704874	low
SAM2f228939632f	0.704874	low
SAM297c0301e861	0.704874	low
SAMeff2ce356ccb	0.704874	low
SAM025b45c27e05	0.704874	low
SAMfd947610629d	0.704874	low
SAM49d48750e294	0.704874	low
SAMef0e3d2415fd	0.704874	low
SAM2dc3f04e45e9	0.704874	low
SAM0f956e757453	0.704874	low
SAMa1e62d323e1d	0.704874	low
SAM753d4bb52dbe	0.704874	low
SAMb2f1d0e54ece	0.704874	low
SAM97a00e0929fb	0.704874	low
SAM568ce160abd9	0.704874	low
SAMc0d625a50eb8	0.704874	low
SAMab8052a03398	0.704874	low
SAM75f12d1a55fc	0.704874	low
SAM9e11ec6bea80	0.704874	low
SAM61baf919bb01	0.704874	low
SAMdb3f50c9129c	0.704874	low
SAM5cfa1699bdb7	0.704874	low
SAM18b9351e265a	0.704874	low
SAM1f66db567eb5	0.704874	low
SAM59f392864f5d	0.704874	low
SAM39eb94fa504d	0.704874	low
SAM415f36ad349e	0.704874	low
SAM34430ef08e5b	0.704874	low
SAM5767dd75d142	0.704874	low
SAMe9475f77504b	0.704874	low
SAM727c0e92a2a7	0.704874	low
SAM3330c03fdf00	0.704874	low
SAM203dcf14f927	0.704874	low
SAM771445e92421	0.704874	low
SAMd7d57ee3a863	0.704874	low
SAM2eb07dedf07f	0.704874	low
SAM6083aac8db99	0.704874	low
SAMbf1a3ae828e6	0.704874	low
SAMc2a1820d4e6b	0.704874	low
SAM1c8b086175ca	0.704874	low
SAMaec7380f9ab0	0.704874	low
SAM1dda30f1c5be	0.704874	low
SAM14938611a2d3	0.704874	low
SAM2e9ac0b1b250	0.704874	low
SAMb3c02294aba7	0.704874	low
SAMfb7aec7cb0e2	0.704874	low
SAMb419a8fcbfcd	0.704874	low
SAM36a9225b0222	0.704874	low
SAMe41b1e773582	0.770179	low
SAM4305ab968b90	0.770179	low
SAMd1bd63734394	0.770179	low
SAM468a9e1dc821	0.770179	low
SAM110501d0eedb	0.770179	low
SAM5234688806a7	0.770179	low
SAMa321770ac31c	0.770179	low
SAM2e7aa8fa0ab3	0.770179	low
SAM3ee5dcd894f0	0.770179	low
SAMb0d11db9aa79	0.770179	low
SAMd35318127278	0.770179	low
SAM00b9e5c52da9	0.791965	low
SAMb8101c538753	0.791965	low
SAM7d7c54623618	0.791965	low
SAMd027124354ce	0.791965	low
SAMc6eff056c89a	0.822015	low
SAM04c589eb3fb3	0.843916	low
SAM943df5cf15df	0.843916	low
SAM7aa01fc49a80	0.843916	low
SAMb963dda93cfd	0.843916	low
SAMa913c6139ec8	0.843916	low
SAMdcae54fcd7fa	0.843916	low
SAMe56c96c51190	0.843916	low
SAM7d2dfba6cd84	0.843916	low
SAMffa5c7cad0e5	0.843916	low
SAM572f19794c96	0.843916	low
SAM47fc46c3d6be	0.843916	low
SAM8884fe446d20	0.843916	low
SAM19fec8f3b3bd	0.976755	low
SAM52500cabdd36	0.998666	low
SAM698d8d76b934	1.02691	low
SAM59b825252c0d	1.02691	low
SAMbcb07ba81cee	1.02691	low
SAM7bff231634e9	1.02691	low
SAM59289ca42c99	1.09428	low
SAM7829a341b9f3	1.09428	low
SAM7f0d9cc7f001	1.09428	low
SAM9410b866974a	1.09428	low
SAM65afda25b920	1.09428	low
SAM30b5c6c54cf7	1.09428	low
SAMd636e3461955	1.09428	low
SAM30cf07d4874f	1.09428	low
SAM9fb814c22bdb	1.09428	low
SAM7538ad9ff524	1.09428	low
SAM6dd7ad1d797d	1.09428	low
SAMd43f8933066b	1.09428	low
SAMa9ca8536d2b1	1.09428	low
SAM7fb6987514a4	1.09428	low
SAM36d87392593b	1.09428	low
SAM18bc1078bc15	1.12206	low
SAMcabb6d58ff55	1.12206	low
SAMe7e4f7c076a7	1.22948	high
SAMbe25e2c88f3e	1.22948	high
SAM18a4dabbc557	1.42301	high
SAM6cbc10abddb0	1.59423	high
SAMa90d73f8d891	4.05846	high
