# Supplementary material for: A circadian rhythm-related gene signature associated with tumor immunity, cisplatin efficacy, and prognosis in bladder cancer
Source: Aging (Albany NY). 2021 Dec 3;13(23):25153–79. doi: 10.18632/aging.203733 (PMC8714136; doi:10.18632/aging.203733)
Supplement: Supplementary Table 15 [file aging-13-203733-s013.xls]

## Sheet: GSVA_limma
Supplementary Table 15. The differential analysis of the phenotypes via limma package.
gene	logFC	AveExpr	t	P.Value	adj.P.Val	B
HALLMARK_KRAS_SIGNALING_DN	0.0774117	0.0612353	9.7523	2.67678e-20	1.33839e-18	35.2725
HALLMARK_COAGULATION	0.134147	0.0308688	7.75012	7.66606e-14	3.75637e-12	20.6396
HALLMARK_INFLAMMATORY_RESPONSE	0.161803	0.00246033	7.59036	2.27028e-13	1.08974e-11	19.5746
HALLMARK_COMPLEMENT	0.128642	0.00551548	7.3627	1.03699e-12	4.87385e-11	18.0857
HALLMARK_PANCREAS_BETA_CELLS	0.0861545	0.0670433	6.84294	2.92623e-11	1.34606e-09	14.8177
HALLMARK_KRAS_SIGNALING_UP	0.106895	0.00686633	6.69484	7.32948e-11	3.29827e-09	13.9208
HALLMARK_APICAL_JUNCTION	0.0944636	-6.48721e-05	6.59015	1.38978e-10	6.11504e-09	13.2963
HALLMARK_IL6_JAK_STAT3_SIGNALING	0.140517	0.00679769	6.52595	2.04969e-10	8.81367e-09	12.9173
HALLMARK_EPITHELIAL_MESENCHYMAL_TRANSITION	0.169749	-0.000929089	6.52326	2.0832e-10	8.81367e-09	12.9014
HALLMARK_ANGIOGENESIS	0.138398	0.0215354	6.40213	4.30117e-10	1.76348e-08	12.1946
HALLMARK_HEDGEHOG_SIGNALING	0.0879885	0.020932	5.70272	2.2955e-08	9.18199e-07	8.32841
HALLMARK_DNA_REPAIR	-0.0698976	-0.0508182	-5.53479	5.64907e-08	2.20314e-06	7.45627
HALLMARK_APICAL_SURFACE	0.0705326	0.0156589	5.53273	5.71084e-08	2.20314e-06	7.44575
HALLMARK_HYPOXIA	0.0791232	-0.013797	5.46525	8.15045e-08	3.01567e-06	7.10167
HALLMARK_OXIDATIVE_PHOSPHORYLATION	-0.0947108	-0.0493851	-5.33877	1.5725e-07	5.66099e-06	6.46662
HALLMARK_TNFA_SIGNALING_VIA_NFKB	0.114383	-0.0119535	5.1894	3.36281e-07	1.17698e-05	5.73324
HALLMARK_PEROXISOME	-0.059453	-0.0169033	-5.18793	3.38778e-07	1.17698e-05	5.72611
HALLMARK_APOPTOSIS	0.0747366	-0.0107542	5.1465	4.16974e-07	1.37601e-05	5.52596
HALLMARK_ALLOGRAFT_REJECTION	0.122717	-0.0104213	5.0506	6.70864e-07	2.14676e-05	5.06806
HALLMARK_UV_RESPONSE_UP	0.0423533	-0.00476467	4.72554	3.18404e-06	9.87052e-05	3.57272
HALLMARK_MYOGENESIS	0.0781357	0.00505583	4.68893	3.77429e-06	0.000113229	3.40986
HALLMARK_IL2_STAT5_SIGNALING	0.0735755	-0.0155092	4.65321	4.45104e-06	0.00012908	3.25202
HALLMARK_ESTROGEN_RESPONSE_LATE	0.0443408	0.0026908	3.96574	8.66942e-05	0.00242744	0.428816
HALLMARK_INTERFERON_GAMMA_RESPONSE	0.0991402	-0.0229015	3.77836	0.000181888	0.00491097	-0.268758
HALLMARK_MTORC1_SIGNALING	0.0535431	-0.0356767	3.4389	0.000645502	0.0167831	-1.4521
HALLMARK_HEME_METABOLISM	0.0304823	-0.0110426	3.43426	0.000656325	0.0167831	-1.46754
HALLMARK_SPERMATOGENESIS	0.0378552	0.0259345	3.34388	0.000904139	0.0216993	-1.76457
HALLMARK_GLYCOLYSIS	0.0342271	-0.0266086	3.2918	0.00108398	0.0249315	-1.93233
HALLMARK_UV_RESPONSE_DN	0.0505708	-0.0277189	3.10735	0.00202251	0.0444952	-2.50632
HALLMARK_ADIPOGENESIS	-0.0309454	-0.0276218	-2.6736	0.00781169	0.164046	-3.73133
HALLMARK_FATTY_ACID_METABOLISM	-0.0302578	-0.019014	-2.64907	0.00839132	0.167826	-3.79533
HALLMARK_ANDROGEN_RESPONSE	0.0363423	-0.0262277	2.55921	0.0108583	0.206308	-4.02488
HALLMARK_XENOBIOTIC_METABOLISM	0.0266987	0.0136665	2.42881	0.0155886	0.280595	-4.34436
HALLMARK_G2M_CHECKPOINT	0.059856	-0.0216943	2.36406	0.018553	0.315401	-4.49695
HALLMARK_INTERFERON_ALPHA_RESPONSE	0.068925	-0.0314939	2.2719	0.0236232	0.377971	-4.70725
HALLMARK_E2F_TARGETS	0.0570635	-0.019367	2.03075	0.0429418	0.644128	-5.21888
HALLMARK_ESTROGEN_RESPONSE_EARLY	0.0233519	-0.0083981	1.89609	0.058669	0.821365	-5.48013
HALLMARK_BILE_ACID_METABOLISM	-0.0210371	0.00298953	-1.80951	0.0711229	0.924598	-5.63881
HALLMARK_MITOTIC_SPINDLE	0.029323	-0.0410384	1.7997	0.0726619	0.924598	-5.65632
HALLMARK_TGF_BETA_SIGNALING	0.0334732	-0.0222376	1.77899	0.0760008	0.924598	-5.693
HALLMARK_WNT_BETA_CATENIN_SIGNALING	0.0212905	-0.0153486	1.58964	0.112707	1	-6.00893
HALLMARK_PROTEIN_SECRETION	0.0248385	-0.0229667	1.42928	0.153705	1	-6.24905
HALLMARK_P53_PATHWAY	0.0156648	-0.0257617	1.18283	0.23758	1	-6.5688
HALLMARK_CHOLESTEROL_HOMEOSTASIS	0.016404	-0.0219052	1.16031	0.246616	1	-6.59504
HALLMARK_PI3K_AKT_MTOR_SIGNALING	0.009027	-0.0350252	0.808179	0.419468	1	-6.93995
HALLMARK_REACTIVE_OXYGEN_SPECIES_PATHWAY	0.00994512	-0.0320121	0.689106	0.491157	1	-7.02877
HALLMARK_MYC_TARGETS_V2	-0.0154104	-0.0410576	-0.62191	0.534355	1	-7.07266
HALLMARK_MYC_TARGETS_V1	-0.0104488	-0.0415016	-0.480665	0.631017	1	-7.15029
HALLMARK_UNFOLDED_PROTEIN_RESPONSE	0.00121758	-0.0416545	0.0933165	0.925699	1	-7.26117
HALLMARK_NOTCH_SIGNALING	0.0012176	-0.0226659	0.0900591	0.928285	1	-7.26147
