# Supplementary material for: A circadian rhythm-related gene signature associated with tumor immunity, cisplatin efficacy, and prognosis in bladder cancer
Source: Aging (Albany NY). 2021 Dec 3;13(23):25153–79. doi: 10.18632/aging.203733 (PMC8714136; doi:10.18632/aging.203733)
Supplement: Supplementary Table 16 [file aging-13-203733-s014.xls]

## Sheet: GSEA_high_CRRS
Supplementary Table 16. The GSEA results in the subgroup with high CRRS.
NAME	GS<br> follow link to MSigDB	GS DETAILS	SIZE	ES	NES	NOM p-val	FDR q-val	FWER p-val	RANK AT MAX	LEADING EDGE
HALLMARK_EPITHELIAL_MESENCHYMAL_TRANSITION	HALLMARK_EPITHELIAL_MESENCHYMAL_TRANSITION	Details ...	198	0.695303	3.57743	0	0	0	3599	tags=71%, list=18%, signal=86%
HALLMARK_INFLAMMATORY_RESPONSE	HALLMARK_INFLAMMATORY_RESPONSE	Details ...	199	0.63898	3.24775	0	0	0	3403	tags=56%, list=17%, signal=67%
HALLMARK_INTERFERON_GAMMA_RESPONSE	HALLMARK_INTERFERON_GAMMA_RESPONSE	Details ...	198	0.572579	2.9175	0	0	0	4517	tags=62%, list=23%, signal=79%
HALLMARK_TNFA_SIGNALING_VIA_NFKB	HALLMARK_TNFA_SIGNALING_VIA_NFKB	Details ...	199	0.562737	2.88401	0	0	0	4282	tags=61%, list=22%, signal=77%
HALLMARK_ALLOGRAFT_REJECTION	HALLMARK_ALLOGRAFT_REJECTION	Details ...	195	0.554775	2.79932	0	0	0	4259	tags=56%, list=22%, signal=71%
HALLMARK_COMPLEMENT	HALLMARK_COMPLEMENT	Details ...	200	0.525024	2.6847	0	0	0	4923	tags=61%, list=25%, signal=81%
HALLMARK_MTORC1_SIGNALING	HALLMARK_MTORC1_SIGNALING	Details ...	195	0.514303	2.62747	0	0	0	4431	tags=52%, list=23%, signal=66%
HALLMARK_APICAL_JUNCTION	HALLMARK_APICAL_JUNCTION	Details ...	198	0.500573	2.54145	0	0	0	3976	tags=46%, list=20%, signal=57%
HALLMARK_IL6_JAK_STAT3_SIGNALING	HALLMARK_IL6_JAK_STAT3_SIGNALING	Details ...	87	0.554652	2.51328	0	0	0	4396	tags=59%, list=22%, signal=75%
HALLMARK_INTERFERON_ALPHA_RESPONSE	HALLMARK_INTERFERON_ALPHA_RESPONSE	Details ...	95	0.542718	2.48163	0	0	0	3677	tags=53%, list=19%, signal=65%
HALLMARK_COAGULATION	HALLMARK_COAGULATION	Details ...	138	0.476361	2.31239	0	0	0	4314	tags=49%, list=22%, signal=63%
HALLMARK_HYPOXIA	HALLMARK_HYPOXIA	Details ...	196	0.45083	2.28896	0	0	0	4540	tags=49%, list=23%, signal=63%
HALLMARK_IL2_STAT5_SIGNALING	HALLMARK_IL2_STAT5_SIGNALING	Details ...	197	0.444514	2.26261	0	0	0	3804	tags=43%, list=19%, signal=52%
HALLMARK_APOPTOSIS	HALLMARK_APOPTOSIS	Details ...	160	0.447292	2.22398	0	0	0	3665	tags=41%, list=19%, signal=50%
HALLMARK_G2M_CHECKPOINT	HALLMARK_G2M_CHECKPOINT	Details ...	194	0.436609	2.22232	0	0	0	4707	tags=48%, list=24%, signal=63%
HALLMARK_KRAS_SIGNALING_UP	HALLMARK_KRAS_SIGNALING_UP	Details ...	198	0.440229	2.19637	0	0	0	4555	tags=49%, list=23%, signal=64%
HALLMARK_E2F_TARGETS	HALLMARK_E2F_TARGETS	Details ...	198	0.42257	2.15017	0	0	0	4773	tags=46%, list=24%, signal=60%
HALLMARK_UV_RESPONSE_DN	HALLMARK_UV_RESPONSE_DN	Details ...	141	0.426355	2.04926	0	0	0	3053	tags=40%, list=16%, signal=48%
HALLMARK_REACTIVE_OXYGEN_SPECIES_PATHWAY	HALLMARK_REACTIVE_OXYGEN_SPECIES_PATHWAY	Details ...	49	0.497853	2.01301	0	0	0	2018	tags=33%, list=10%, signal=36%
HALLMARK_MYOGENESIS	HALLMARK_MYOGENESIS	Details ...	198	0.40014	2.01204	0	0	0	4284	tags=41%, list=22%, signal=53%
HALLMARK_MITOTIC_SPINDLE	HALLMARK_MITOTIC_SPINDLE		198	0.395799	1.9868	0	0	0	4359	tags=47%, list=22%, signal=60%
HALLMARK_ANGIOGENESIS	HALLMARK_ANGIOGENESIS		36	0.519823	1.93538	0	0.000108586	0.001	4812	tags=67%, list=25%, signal=88%
HALLMARK_GLYCOLYSIS	HALLMARK_GLYCOLYSIS		198	0.378434	1.93139	0	0.000103865	0.001	4117	tags=40%, list=21%, signal=51%
HALLMARK_P53_PATHWAY	HALLMARK_P53_PATHWAY		194	0.364293	1.86625	0	0.000784985	0.005	2987	tags=35%, list=15%, signal=40%
HALLMARK_ANDROGEN_RESPONSE	HALLMARK_ANDROGEN_RESPONSE		98	0.392996	1.80376	0	0.000753586	0.005	3559	tags=40%, list=18%, signal=48%
HALLMARK_MYC_TARGETS_V1	HALLMARK_MYC_TARGETS_V1		196	0.323482	1.65357	0	0.00315077	0.027	3311	tags=29%, list=17%, signal=35%
HALLMARK_TGF_BETA_SIGNALING	HALLMARK_TGF_BETA_SIGNALING		54	0.401562	1.63381	0.00274725	0.00433554	0.037	2983	tags=35%, list=15%, signal=41%
HALLMARK_PROTEIN_SECRETION	HALLMARK_PROTEIN_SECRETION		95	0.356844	1.62999	0	0.0041807	0.037	5030	tags=45%, list=26%, signal=61%
HALLMARK_ESTROGEN_RESPONSE_LATE	HALLMARK_ESTROGEN_RESPONSE_LATE		197	0.31516	1.62217	0	0.00436138	0.04	4555	tags=41%, list=23%, signal=52%
HALLMARK_APICAL_SURFACE	HALLMARK_APICAL_SURFACE		44	0.401997	1.55661	0.0192837	0.00725616	0.068	2642	tags=36%, list=14%, signal=42%
HALLMARK_ESTROGEN_RESPONSE_EARLY	HALLMARK_ESTROGEN_RESPONSE_EARLY		197	0.305289	1.5503	0	0.00743395	0.072	3863	tags=36%, list=20%, signal=44%
HALLMARK_HEME_METABOLISM	HALLMARK_HEME_METABOLISM		191	0.301164	1.51286	0	0.0101421	0.097	3687	tags=31%, list=19%, signal=38%
HALLMARK_UNFOLDED_PROTEIN_RESPONSE	HALLMARK_UNFOLDED_PROTEIN_RESPONSE		108	0.312944	1.4535	0.00337838	0.0172747	0.167	4276	tags=37%, list=22%, signal=47%
HALLMARK_UV_RESPONSE_UP	HALLMARK_UV_RESPONSE_UP		156	0.296482	1.44915	0.00763359	0.0175706	0.175	4450	tags=34%, list=23%, signal=44%
HALLMARK_PI3K_AKT_MTOR_SIGNALING	HALLMARK_PI3K_AKT_MTOR_SIGNALING		105	0.305334	1.43982	0.015625	0.0182664	0.184	4765	tags=37%, list=24%, signal=49%
HALLMARK_HEDGEHOG_SIGNALING	HALLMARK_HEDGEHOG_SIGNALING		36	0.347596	1.28391	0.130542	0.0660796	0.542	5354	tags=47%, list=27%, signal=65%
HALLMARK_WNT_BETA_CATENIN_SIGNALING	HALLMARK_WNT_BETA_CATENIN_SIGNALING		42	0.325676	1.27323	0.132275	0.0695217	0.571	2681	tags=24%, list=14%, signal=28%
HALLMARK_CHOLESTEROL_HOMEOSTASIS	HALLMARK_CHOLESTEROL_HOMEOSTASIS		73	0.293462	1.26705	0.0979229	0.0715549	0.592	4917	tags=37%, list=25%, signal=49%
HALLMARK_XENOBIOTIC_METABOLISM	HALLMARK_XENOBIOTIC_METABOLISM		197	0.224306	1.15054	0.12605	0.178435	0.905	3657	tags=27%, list=19%, signal=33%
HALLMARK_MYC_TARGETS_V2	HALLMARK_MYC_TARGETS_V2		58	0.24395	1.00946	0.424658	0.460466	0.998	2989	tags=24%, list=15%, signal=28%
HALLMARK_NOTCH_SIGNALING	HALLMARK_NOTCH_SIGNALING		32	0.249583	0.900243	0.606299	0.765696	1	3026	tags=25%, list=15%, signal=30%
HALLMARK_KRAS_SIGNALING_DN	HALLMARK_KRAS_SIGNALING_DN		197	0.162795	0.831026	0.929961	0.899094	1	5648	tags=33%, list=29%, signal=46%
HALLMARK_PANCREAS_BETA_CELLS	HALLMARK_PANCREAS_BETA_CELLS		40	0.165269	0.633079	0.981912	0.994248	1	2873	tags=18%, list=15%, signal=20%
